# Supplementary material for: Unbiased Approach for the Identification of Molecular Mechanisms Sensitive to Chemical Exposures
Source: Preprints.org preprint supplement (doi:10.20944/preprints202006.0261.v1), 2020-06-21
Supplement: Supplementary file 1 [file supplementary]

## Sheet: Data File 1
Supplemental File 1. Chemical-gene interaction dataset extracted from CTD. The dataset includes only data from experiments that used high-throughput gene expression analysis and used human, rat or mouse whole organism, tissue or cells. Annotation about use of chemicals was added manually.
Chemical Term	Gene Term	Action Direction	Taxonomy Accession	PMID	Use 1	Use 2	Use 3	Use description
Diethylnitrosamine	43160	-	Rattus	19638242	drug of abuse	0	0	tobacco smoke
1-Methyl-4-phenylpyridinium	43160	-	Homo	24810058	agricultural	0	0	herbicide, research
Propylthiouracil	43160	+	Rattus	24780913	pharmaceutical	0	0	antithyroid
entinostat	43160	+	Homo	26272509	pharmaceutical	0	0	histone deacetylase inhibitor
Antirheumatic Agents	43160	-	Homo	24449571	pharmaceutical	0	0	antirheumatic agents
Aflatoxin B1	43160	-	Homo	21632981	pollutant	0	0	fungal toxin
Carbon Tetrachloride	43160	-	Mus	27339419	industrial	0	0	cleaning and other
bisphenol A	43160	-	Rattus	25181051	industrial	0	0	monomer of polycarbonate plastic
Hydrogen Peroxide	43160	1	Homo	23410634	industrial	0	0	industrial, pharmaceutical
Soot	43160	+	Mus	26551751	pollutant	0	0	air pollutant
Benzo(a)pyrene	43160	+	Mus	22228805	pollutant	0	0	product of incomplete combustion of organic material
Cyclosporine	43160	-	Homo	20106945	pharmaceutical	0	0	immune suppressant
Copper Sulfate	43160	-	Homo	19549813	agricultural	0	0	fungicide and herbicide, niche uses
Valproic Acid	43160	1	Homo	25979313	pharmaceutical	0	0	treatment of epilepsy, bipolar disorder and migraine headaches
Valproic Acid	43160	+	Homo	24383497	pharmaceutical	0	0	treatment of epilepsy, bipolar disorder and migraine headaches						agricultural
Acetaminophen	43160	-	Homo	29067470	pharmaceutical	0	0	painkiller
Tretinoin	43160	-	Homo	21934132	pharmaceutical	0	0	treatment of acne and acute promyelocytic leukemia
titanium dioxide	43160	-	Mus	23557971	food component	cosmetics	industrial	pigments, sunscreen and other
Tetrachlorodibenzodioxin	43160	1	Mus	26377647	pollutant	0	0	product of incomplete combustion of organic material
cobaltous chloride	43160	+	Homo	23052192	industrial	0	0	moisture detector
Valproic Acid	43160	+	Homo	26272509	pharmaceutical	0	0	treatment of epilepsy, bipolar disorder and migraine headaches
2,3,7,8-tetrachlorodibenzofuran	43160	-	Rattus	21724226	pollutant	0	0	product of incomplete combustion of organic material
Thimerosal	43160	+	Homo	27188386	pharmaceutical	0	0	antiseptic and antifungal agent
Vitamin K 3	43160	1	Homo	23410634	pharmaceutical	0	0	binding of calcium in bones and other tissues
Tetrachlorodibenzodioxin	43160	-	Rattus	21215274	pollutant	0	0	product of incomplete combustion of organic material
Diclofenac	43160	+	Mus	26934552	pharmaceutical	0	0	nonsteroidal anti-inflammatory drug
Nickel	43160	-	Homo	24768652	industrial	0	0	multiple industrial applications
Cyclosporine	43160	-	Mus	19770486	pharmaceutical	0	0	immune suppressant
methylmercuric chloride	43160	-	Homo	28001369	pollutant	0	0	naturally occuring or results from mining and other activities
Chloroprene	43160	-	Mus	23125180	industrial	0	0	production of neoprene
Fenretinide	43160	-	Mus	28973697	pharmaceutical	0	0	treatment of cancer
p-Chloromercuribenzoic Acid	43160	-	Homo	26272509	research	0	0	protease inhibitor
Valproic Acid	43160	+	Homo	28001369	pharmaceutical	0	0	treatment of epilepsy, bipolar disorder and migraine headaches
Tetrachlorodibenzodioxin	43160	-	Mus	19770486	pollutant	0	0	product of incomplete combustion of organic material
potassium chromate(VI)	43160	-	Homo	22714537	research	0	0	oxidizing agent in organic synthesis
(+)-JQ1 compound	43160	-	Homo	26752646	research	0	0	BET bromodomain inhibitor
Carbamazepine	43160	1	Homo	25979313	pharmaceutical	0	0	reatment of epilepsy and neuropathic pain
Acetaminophen	43160	-	Homo	25704631	pharmaceutical	0	0	painkiller
Quercetin	43160	-	Homo	21632981	food component	0	0	food additive
Cuprizone	43160	-	Rattus	26577399	research	0	0	demyelination agent
Aflatoxin B1	43160	-	Homo	22100608	pollutant	0	0	fungal toxin
Poly(amidoamine)	43160	+	Homo	23806026	pharmaceutical	0	0	drug delivery
Progesterone	43160	-	Homo	21540246	pharmaceutical	cosmetics	endobiotic	hormone
Nanotubes, Carbon	43160	-	Mus	25554681	industrial	0	0	multiple industrial applications
Nickel	43160	+	Homo	24768652	industrial	0	0	multiple industrial applications
Topotecan	43160	+	Rattus	25729387	pharmaceutical	0	0	chemotherapeutic agent that is a topoisomerase inhibitor
titanium dioxide	43160	+	Mus	23557971	food component	cosmetics	industrial	pigments, sunscreen and other
Cuprizone	43160	-	Rattus	27523638	research	0	0	demyelination agent
Soot	43160	-	Mus	26551751	pollutant	0	0	air pollutant
nefazodone	43160	-	Rattus	24136188	pharmaceutical	0	0	antidepressant
Tetrachlorodibenzodioxin	43160	-	Rattus	21724226	pollutant	0	0	product of incomplete combustion of organic material
benzo(k)fluoranthene	43160	+	Mus	26377693	pollutant	0	0	product of incomplete combustion of organic material
Silicon Dioxide	43160	-	Mus	23221170	industrial	0	0	multiple industrial applications
nimesulide	43160	-	Rattus	24136188	pharmaceutical	0	0	nonsteroidal anti-inflammatory drug
furan	43160	-	Rattus	25539665	pollutant	0	0	thermal degradation of natural food constituents
benz(a)anthracene	43160	+	Mus	26377693	pollutant	0	0	product of incomplete combustion of organic material
Valproic Acid	43160	+	Homo	29154799	pharmaceutical	0	0	treatment of epilepsy, bipolar disorder and migraine headaches
1,4-bis(2-(3,5-dichloropyridyloxy))benzene	43160	-	Mus	28903501	research	0	0	potent CAR ligand
Nickel	43160	-	Homo	25583101	industrial	0	0	multiple industrial applications
Valproic Acid	43160	-	Mus	24896083	pharmaceutical	0	0	treatment of epilepsy, bipolar disorder and migraine headaches
propiconazole	43160	-	Mus	21278054	agricultural	0	0	demethylation inhibiting fungicide
Tetrachlorodibenzodioxin	43160	-	Homo	21632981	pollutant	0	0	product of incomplete combustion of organic material
Nanotubes, Carbon	43160	-	Mus	25554681	industrial	0	0	multiple industrial applications
Benzo(a)pyrene	43160	-	Homo	22316170	pollutant	0	0	product of incomplete combustion of organic material
Flutamide	43160	-	Rattus	24136188	pharmaceutical	0	0	nonsteroidal antiandrogen to treat prostate cancer
ethylene dichloride	43160	-	Mus	28189721	industrial	0	0	intermediate in PVC production
Azathioprine	43160	-	Homo	22623647	pharmaceutical	0	0	immune suppressant
Endosulfan	43160	-	Rattus	29391264	agricultural	0	0	organochlorine insecticide
Valproic Acid	43160	+	Homo	23179753	pharmaceutical	0	0	treatment of epilepsy, bipolar disorder and migraine headaches
tert-Butylhydroperoxide	43160	1	Homo	23410634	industrial	0	0	chemical synthesis
Cyclosporine	43160	-	Homo	27989131	pharmaceutical	0	0	immune suppressant
Dietary Sucrose	43160	+	Rattus	26033743	food component	0	0	food
oxaliplatin	43160	+	Rattus	25729387	pharmaceutical	0	0	treatment of colorectal cancer
Nickel	43160	+	Homo	25583101	industrial	0	0	multiple industrial applications
Phenobarbital	43160	-	Mus	19482888	pharmaceutical	0	0	treatment of epilepsy
Glafenine	43160	-	Rattus	24136188	pharmaceutical	0	0	nonsteroidal anti-inflammatory drug
Nanotubes, Carbon	43160	-	Mus	25620056	industrial	0	0	multiple industrial applications
Thioacetamide	43160	-	Rattus	23411599	research	0	0	source of sulfide ions
2,3,4,7,8-pentachlorodibenzofuran	43160	-	Rattus	21724226	pollutant	0	0	product of incomplete combustion of organic material
perfluorooctanoic acid	43161	-	Homo	23146750	industrial	0	0	surfactant
Dibutyl Phthalate	43161	+	Mus	17361019	industrial	0	0	plasticizer
Valproic Acid	43161	1	Homo	25979313	pharmaceutical	0	0	treatment of epilepsy, bipolar disorder and migraine headaches
Fenretinide	43161	-	Mus	28973697	pharmaceutical	0	0	treatment of cancer
2,4-dinitrotoluene	43161	1	Rattus	21346803	industrial	0	0	precursor to toluene diisocyanate
7,8-Dihydro-7,8-dihydroxybenzo(a)pyrene 9,10-oxide	43161	+	Homo	20382639	pollutant	0	0	metabolite of benzo(a)pyrene - product of incomplete combustion of organic material
Cadmium Chloride	43161	+	Mus	24982889	industrial	0	0	multiple industrial applications
Thapsigargin	43161	+	Homo	22378314	research	0	0	tumor promoter, inhibitor of the sarco/endoplasmic reticulum Ca²? ATPase
Buspirone	43161	+	Rattus	24136188	pharmaceutical	0	0	anxiolytic drug
Flutamide	43161	-	Rattus	24136188	pharmaceutical	0	0	nonsteroidal antiandrogen to treat prostate cancer
undecane	43161	-	Rattus	17337753	industrial	0	0	sex attractant for various types of moths and cockroaches
Trichloroethylene	43161	+	Rattus	19448997	industrial	0	0	solvent
Valproic Acid	43161	+	Mus	20546886	pharmaceutical	0	0	treatment of epilepsy, bipolar disorder and migraine headaches
Benzo(a)pyrene	43161	+	Homo	21632981	pollutant	0	0	product of incomplete combustion of organic material
bis(4-hydroxyphenyl)sulfone	43161	+	Homo	27685785	industrial	0	0	multiple industrial applications
propiconazole	43161	-	Mus	21278054	agricultural	0	0	demethylation inhibiting fungicide
Zinc	43161	+	Rattus	12672911	industrial	0	0	multiple industrial applications
Ethyl Methanesulfonate	43161	+	Homo	23649840	research	0	0	mutagen
Dietary Fats	43161	+	Mus	25016146	food component	0	0	food
jinfukang	43161	+	Homo	27392435	pharmaceutical	0	0	Chinese herbal medicine with potential immunopotentiation activity
Valproic Acid	43161	+	Homo	28001369	pharmaceutical	0	0	treatment of epilepsy, bipolar disorder and migraine headaches
bisphenol A	43161	1	Rattus	25181051	industrial	0	0	monomer of polycarbonate plastic
Aflatoxin B1	43161	-	Homo	22100608	pollutant	0	0	fungal toxin
Benzo(a)pyrene	43161	+	Homo	20106945	pollutant	0	0	product of incomplete combustion of organic material
Acetaminophen	43161	+	Homo	25704631	pharmaceutical	0	0	painkiller
tert-Butylhydroperoxide	43161	-	Homo	29432895	industrial	0	0	chemical synthesis
Nanotubes, Carbon	43161	-	Mus	25554681	industrial	0	0	multiple industrial applications
dimethyl-4-toluidine	43161	+	Rattus	27638505	pharmaceutical	0	0	use in dental materials and bone cements
Nickel	43161	-	Homo	24768652	industrial	0	0	multiple industrial applications
Cyclosporine	43161	-	Homo	20106945	pharmaceutical	0	0	immune suppressant
Heptachlor Epoxide	43161	-	Mus	25270620	agricultural	0	0	insecticide
(+)-JQ1 compound	43161	-	Homo	23086925	research	0	0	BET bromodomain inhibitor
2-methyl-2H-pyrazole-3-carboxylic acid (2-methyl-4-o-tolylazophenyl)amide	43161	-	Homo	29704546	research	0	0	AhR inhibitor
pirinixic acid	43161	+	Mus	23811191	research	0	0	peroxisome proliferator-activated receptor alpha (PPARa) agonist
pirinixic acid	43161	-	Mus	20813756	research	0	0	peroxisome proliferator-activated receptor alpha (PPARa) agonist
Sodium Selenite	43161	-	Mus	23274088	food component	industrial	0	glass production, dietary supplements
entinostat	43161	+	Homo	26272509	pharmaceutical	0	0	histone deacetylase inhibitor
nickel sulfate	43161	+	Homo	22714537	industrial	0	0	electroplating of nickel
Dietary Fats	43161	+	Mus	19467301	food component	0	0	food
Tetrachlorodibenzodioxin	43161	-	Rattus	21215274	pollutant	0	0	product of incomplete combustion of organic material
Valproic Acid	43161	+	Mus	21427059	pharmaceutical	0	0	treatment of epilepsy, bipolar disorder and migraine headaches
Valproic Acid	43161	1	Homo	25979313	pharmaceutical	0	0	treatment of epilepsy, bipolar disorder and migraine headaches
Acetaminophen	43161	+	Homo	22230336	pharmaceutical	0	0	painkiller
Phenobarbital	43161	-	Mus	23091169	pharmaceutical	0	0	treatment of epilepsy
Tetrachlorodibenzodioxin	43161	1	Rattus	22298810	pollutant	0	0	product of incomplete combustion of organic material
Ketolides	43161	+	Mus	24967691	pharmaceutical	0	0	antibiotics
Endosulfan	43161	-	Rattus	29391264	agricultural	0	0	organochlorine insecticide
S-2-pentyl-4-pentynoic hydroxamic acid	43161	+	Mus	21427059	pharmaceutical	0	0	derivative of valproic acid - treatment of epilepsy, bipolar disorder and migraine headaches
Acetaminophen	43161	-	Homo	29067470	pharmaceutical	0	0	painkiller
Flutamide	43161	-	Rattus	24136188	pharmaceutical	0	0	nonsteroidal antiandrogen to treat prostate cancer
K 7174	43161	+	Homo	24086573	research	0	0	cell adhesion inhibitor, proteasome inhibitor
Zearalenone	43161	+	Mus	25058043	pollutant	0	0	mycotoxin, is a potent estrogenic metabolite
O,O-diethyl O-3,5,6-trichloro-2-pyridyl phosphate	43161	+	Mus	21673326	agricultural	0	0	organophosphate pesticide
Nickel	43161	-	Homo	25583101	industrial	0	0	multiple industrial applications
Valproic Acid	43161	+	Homo	27188386	pharmaceutical	0	0	treatment of epilepsy, bipolar disorder and migraine headaches
Buspirone	43161	+	Rattus	24136188	pharmaceutical	0	0	anxiolytic drug
Propylthiouracil	43161	-	Rattus	24780913	pharmaceutical	0	0	antithyroid
(+)-JQ1 compound	43161	+	Homo	24796395	research	0	0	BET bromodomain inhibitor
Dibutyl Phthalate	43161	-	Rattus	21266533	industrial	0	0	plasticizer
Soman	43161	-	Rattus	19281266	chemical warfare	0	0	chemical warfare
Clofibrate	43161	-	Mus	17585979	pharmaceutical	0	0	controlling the high cholesterol and triacylglyceride
Glafenine	43161	-	Rattus	24136188	pharmaceutical	0	0	nonsteroidal anti-inflammatory drug
Hypochlorous Acid	43161	-	Mus	19376150	industrial	0	0	disinfection agents
Tetrachlorodibenzodioxin	43161	+	Homo	20106945	pollutant	0	0	product of incomplete combustion of organic material
methylmercuric chloride	43161	-	Homo	28001369	pollutant	0	0	naturally occuring or results from mining and other activities
Hypochlorous Acid	43161	-	Mus	19376150	industrial	0	0	disinfection agents
2,2',4,4'-tetrabromodiphenyl ether	43161	-	Homo	23146750	industrial	0	0	flame retardent
Valproic Acid	43161	+	Homo	19101580	pharmaceutical	0	0	treatment of epilepsy, bipolar disorder and migraine headaches
Tetrachlorodibenzodioxin	43161	+	Homo	21632981	pollutant	0	0	product of incomplete combustion of organic material
vinclozolin	43161	-	Rattus	23034163	agricultural	0	0	fungicide
bisphenol A	43161	1	Rattus	25181051	industrial	0	0	monomer of polycarbonate plastic
Proton Pump Inhibitors	43161	-	Rattus	25626140	pharmaceutical	0	0	Proton-pump inhibitors
Valproic Acid	43161	+	Homo	23179753	pharmaceutical	0	0	treatment of epilepsy, bipolar disorder and migraine headaches
panobinostat	43161	+	Homo	26272509	pharmaceutical	0	0	Anticancer drug, histone deacetylase inhibitor
Glafenine	43161	-	Rattus	24136188	pharmaceutical	0	0	nonsteroidal anti-inflammatory drug
Tetrachlorodibenzodioxin	43161	-	Rattus	21724226	pollutant	0	0	product of incomplete combustion of organic material
cobaltous chloride	43161	-	Rattus	24386269	industrial	0	0	moisture detector
Cyclosporine	43161	-	Homo	25562108	pharmaceutical	0	0	immune suppressant
Tetrachlorodibenzodioxin	43161	1	Homo	22298810	pollutant	0	0	product of incomplete combustion of organic material
Dibutyl Phthalate	43161	+	Mus	21266533	industrial	0	0	plasticizer
Tunicamycin	43161	+	Homo	22378314	research	0	0	causes cell cycle arrest in G1 phase
Valproic Acid	43161	1	Mus	17292431	pharmaceutical	0	0	treatment of epilepsy, bipolar disorder and migraine headaches
Phenobarbital	43161	-	Rattus	19162173	pharmaceutical	0	0	treatment of epilepsy
Thimerosal	43161	-	Homo	27188386	pharmaceutical	0	0	antiseptic and antifungal agent
pseudocumene	43161	-	Rattus	17337753	industrial	0	0	multiple industrial applications
valdecoxib	43161	-	Rattus	24136188	pharmaceutical	0	0	nonsteroidal anti-inflammatory drug
Propylthiouracil	43161	-	Rattus	24780913	pharmaceutical	0	0	antithyroid
Ammonium Chloride	43161	1	Rattus	16483693	agricultural	0	0	fertilizer
Cyclosporine	43161	-	Homo	20106945	pharmaceutical	0	0	immune suppressant
entinostat	43161	+	Homo	27188386	pharmaceutical	0	0	histone deacetylase inhibitor
decabromobiphenyl ether	43161	+	Rattus	23914054	industrial	0	0	flame retardent
Asbestos, Serpentine	43162	-	Homo	21148743	industrial	0	0	insulating material
cobaltous chloride	43162	+	Rattus	24386269	industrial	0	0	moisture detector
GSK-J4	43162	+	Homo	29301935	research	0	0	jumonji H3K27 demethylase inhibitor
zoledronic acid	43162	+	Homo	24714768	pharmaceutical	0	0	bone deseases treatment
(+)-JQ1 compound	43162	+	Homo	26752646	research	0	0	BET bromodomain inhibitor
Silicon Dioxide	43162	+	Homo	25351596	industrial	0	0	multiple industrial applications
pirinixic acid	43162	+	Mus	20813756	research	0	0	peroxisome proliferator-activated receptor alpha (PPARa) agonist
indole-3-carbinol	43162	1	Rattus	21396975	food component	0	0	anticarcinogenic properties
(+)-JQ1 compound	43162	+	Homo	27432991	research	0	0	BET bromodomain inhibitor
Valproic Acid	43162	+	Homo	28001369	pharmaceutical	0	0	treatment of epilepsy, bipolar disorder and migraine headaches
2',3,3',4',5-pentachloro-4-hydroxybiphenyl	43162	-	Rattus	19114083	industrial	pollutant	0	metabolit of PCB126
Fenretinide	43162	-	Mus	28973697	pharmaceutical	0	0	treatment of cancer
Cytarabine	43162	-	Homo	21198554	pharmaceutical	0	0	anticancer drug (leukemia)
Dasatinib	43162	-	Homo	20579391	pharmaceutical	0	0	chemotherapy medication (leukemia)
oxaliplatin	43162	-	Rattus	25729387	pharmaceutical	0	0	treatment of colorectal cancer
3-dinitrobenzene	43162	-	Rattus	21983209	industrial	0	0	intermediate in chemical industry
benzo(k)fluoranthene	43162	-	Mus	26377693	pollutant	0	0	product of incomplete combustion of organic material
butyraldehyde	43162	+	Homo	26079696	industrial	0	0	intermediate in chemical industry
Diuron	43162	+	Rattus	21551480	agricultural	0	0	algicide and herbicide, inhibitor of photosynthesis
bisphenol A	43162	-	Homo	29275510	industrial	0	0	monomer of polycarbonate plastic
propionaldehyde	43162	+	Homo	26079696	industrial	0	0	intermediate in chemical industry
Antirheumatic Agents	43162	-	Homo	24449571	pharmaceutical	0	0	antirheumatic agents
Methyl Methanesulfonate	43162	+	Homo	23649840	pharmaceutical	0	0	cancer terapy, alkylating agent
Lipopolysaccharides	43162	+	Homo	18192897	pollutant	0	0	component of Gram-negative bacteria
Quercetin	43162	-	Homo	21632981	food component	0	0	food additive
potassium chromate(VI)	43162	-	Homo	22079256	research	0	0	oxidizing agent in organic synthesis
Cyclosporine	43162	+	Homo	20106945	pharmaceutical	0	0	immune suppressant
Acetaminophen	43162	+	Homo	29067470	pharmaceutical	0	0	painkiller
(+)-JQ1 compound	43162	+	Homo	24796395	research	0	0	BET bromodomain inhibitor
bisphenol A	43162	+	Rattus	25181051	industrial	0	0	monomer of polycarbonate plastic
cobaltous chloride	43162	-	Homo	19320972	industrial	0	0	moisture detector
Valproic Acid	43162	+	Homo	23179753	pharmaceutical	0	0	treatment of epilepsy, bipolar disorder and migraine headaches
entinostat	43162	+	Homo	26272509	pharmaceutical	0	0	histone deacetylase inhibitor
Silicon Dioxide	43162	+	Homo	25895662	industrial	0	0	multiple industrial applications
N-(2-(1,1'-bicyclopropyl)-2-ylphenyl)-3-(difluoromethyl)-1-methyl-1H-pyrazole-4-carboxamide	43162	-	Mus	29244179	agricultural	0	0	fungicide (Sedaxane)
Topotecan	43162	-	Rattus	25729387	pharmaceutical	0	0	chemotherapeutic agent that is a topoisomerase inhibitor
Valproic Acid	43162	+	Homo	29154799	pharmaceutical	0	0	treatment of epilepsy, bipolar disorder and migraine headaches
fullerene C60	43162	-	Rattus	19167457	cosmetics	research	pharmaceutical	carbon nano-balls
(+)-JQ1 compound	43162	+	Homo	25307878	research	0	0	BET bromodomain inhibitor
Endosulfan	43162	-	Rattus	29391264	agricultural	0	0	organochlorine insecticide
Chloroprene	43162	-	Rattus	23125180	industrial	0	0	production of neoprene
Phenylmercuric Acetate	43162	-	Homo	26272509	agricultural	industrial	0	antifungal activity in agriculture and in leather processing
7,8-Dihydro-7,8-dihydroxybenzo(a)pyrene 9,10-oxide	43162	-	Homo	20382639	pollutant	0	0	metabolite of benzo(a)pyrene - product of incomplete combustion of organic material
Gentamicins	43162	-	Rattus	22061828	pharmaceutical	0	0	antibiotic
arsenic trioxide	43162	-	Homo	20458559	pharmaceutical	industrial	0	chemotherapeutic agent (leukemia), industrial intermediate
pentanal	43163	+	Homo	26079696	food component	0	0	fruit flavors
butyraldehyde	43163	+	Homo	26079696	industrial	0	0	intermediate in chemical industry
Silicon Dioxide	43163	+	Homo	25895662	industrial	0	0	multiple industrial applications
Air Pollutants	43163	+	Homo	21757418	pollutant	0	0	air pollutants
trichostatin A	43163	+	Homo	26705709	pharmaceutical	research	0	inhibits the class I and II mammalian histone deacetylase (HDAC)
Tunicamycin	43163	-	Homo	22378314	research	0	0	causes cell cycle arrest in G1 phase
Aldehydes	43163	+	Homo	25014914	industrial	0	0	multiple applications
Thapsigargin	43163	-	Homo	22378314	research	0	0	tumor promoter, inhibitor of the sarco/endoplasmic reticulum Ca²? ATPase
arsenic trioxide	43163	+	Homo	20458559	pharmaceutical	industrial	0	chemotherapeutic agent (leukemia), industrial intermediate
Endosulfan	43163	-	Rattus	29391264	agricultural	0	0	organochlorine insecticide
Valproic Acid	43163	+	Homo	23179753	pharmaceutical	0	0	treatment of epilepsy, bipolar disorder and migraine headaches
bisphenol A	43163	-	Homo	27685785	industrial	0	0	monomer of polycarbonate plastic
(+)-JQ1 compound	43163	-	Homo	24796395	research	0	0	BET bromodomain inhibitor
Propylthiouracil	43163	+	Rattus	24780913	pharmaceutical	0	0	antithyroid
propionaldehyde	43163	+	Homo	26079696	industrial	0	0	intermediate in chemical industry
Phenobarbital	43163	1	Homo	19084549	pharmaceutical	0	0	treatment of epilepsy
Formaldehyde	43163	-	Homo	28937961	industrial	research	cosmetics	multiple applications
Plant Extracts	43163	-	Homo	23557933	pharmaceutical	0	0	various pharmaceutical
Valproic Acid	43163	+	Homo	28001369	pharmaceutical	0	0	treatment of epilepsy, bipolar disorder and migraine headaches
valdecoxib	43164	+	Rattus	24136188	pharmaceutical	0	0	nonsteroidal anti-inflammatory drug
Valproic Acid	43164	1	Homo	25979313	pharmaceutical	0	0	treatment of epilepsy, bipolar disorder and migraine headaches
Atrazine	43164	-	Homo	22378314	agricultural	0	0	herbicide
Methyl Methanesulfonate	43164	+	Homo	23649840	pharmaceutical	0	0	cancer terapy, alkylating agent
2,4-dinitrotoluene	43164	1	Rattus	21346803	industrial	0	0	precursor to toluene diisocyanate
bisphenol A	43164	+	Rattus	25181051	industrial	0	0	monomer of polycarbonate plastic
Diethylhexyl Phthalate	43164	-	Mus	21318169	industrial	0	0	plasticizer
Nanotubes, Carbon	43164	+	Mus	25554681	industrial	0	0	multiple industrial applications
pirinixic acid	43164	+	Mus	23811191	research	0	0	peroxisome proliferator-activated receptor alpha (PPARa) agonist
nefazodone	43164	+	Rattus	24136188	pharmaceutical	0	0	antidepressant
Nanotubes, Carbon	43164	+	Mus	25620056	industrial	0	0	multiple industrial applications
Acetaminophen	43164	+	Homo	29067470	pharmaceutical	0	0	painkiller
Valproic Acid	43164	-	Homo	28001369	pharmaceutical	0	0	treatment of epilepsy, bipolar disorder and migraine headaches
Dibutyl Phthalate	43164	+	Mus	21266533	industrial	0	0	plasticizer
Dietary Fats	43164	+	Mus	19467301	food component	0	0	food
nimesulide	43164	+	Rattus	24136188	pharmaceutical	0	0	nonsteroidal anti-inflammatory drug
Cyclosporine	43164	+	Homo	25562108	pharmaceutical	0	0	immune suppressant
Copper Sulfate	43164	+	Homo	19549813	agricultural	0	0	fungicide and herbicide, niche uses
cobaltous chloride	43164	+	Homo	19376846	industrial	0	0	moisture detector
Plant Extracts	43164	+	Homo	23557933	pharmaceutical	0	0	various pharmaceutical
2,6-dinitrotoluene	43164	1	Rattus	21346803	industrial	0	0	intermediate in production of polyuretane foams, plasticiser
resveratrol	43164	+	Mus	25505154	food component	0	0	food additive, antioxidant, found in grapes
GSK-J4	43164	+	Homo	29301935	research	0	0	jumonji H3K27 demethylase inhibitor
Flutamide	43164	+	Rattus	24136188	pharmaceutical	0	0	nonsteroidal antiandrogen to treat prostate cancer
Soman	43164	+	Rattus	19281266	chemical warfare	0	0	chemical warfare
bisphenol A	43164	-	Homo	29275510	industrial	0	0	monomer of polycarbonate plastic
Oxygen	43164	+	Mus	22629407	environment	0	0	air component
leflunomide	43164	+	Rattus	24136188	pharmaceutical	0	0	used in active moderate-to-severe rheumatoid arthritis and psoriatic arthritis
Nanotubes, Carbon	43164	+	Mus	25554681	industrial	0	0	multiple industrial applications
Carbamazepine	43164	1	Homo	25979313	pharmaceutical	0	0	reatment of epilepsy and neuropathic pain
Nanotubes, Carbon	43164	+	Mus	25620056	industrial	0	0	multiple industrial applications
oxaliplatin	43164	-	Rattus	25729387	pharmaceutical	0	0	treatment of colorectal cancer
Ethinyl Estradiol	43164	+	Mus	17942748	pharmaceutical	0	0	used as birth control pill, mimics estrogen
bisphenol A	43165	1	Rattus	25181051	industrial	0	0	monomer of polycarbonate plastic
Endosulfan	43165	+	Rattus	29391264	agricultural	0	0	organochlorine insecticide
Valproic Acid	43165	-	Homo	23179753	pharmaceutical	0	0	treatment of epilepsy, bipolar disorder and migraine headaches
chromium hexavalent ion	43165	1	Mus	28472532	industrial	pollutant	0	used in dyes, produced as side-product of Cr(III) containing products
bisphenol A	43165	+	Rattus	29097150	industrial	0	0	monomer of polycarbonate plastic
Ethinyl Estradiol	43165	+	Rattus	29097150	pharmaceutical	0	0	used as birth control pill, mimics estrogen
nefazodone	43165	+	Rattus	24136188	pharmaceutical	0	0	antidepressant
pirinixic acid	43165	+	Mus	23811191	research	0	0	peroxisome proliferator-activated receptor alpha (PPARa) agonist
Valproic Acid	43165	-	Homo	27188386	pharmaceutical	0	0	treatment of epilepsy, bipolar disorder and migraine headaches
Glafenine	43165	-	Rattus	24136188	pharmaceutical	0	0	nonsteroidal anti-inflammatory drug
nimesulide	43165	+	Rattus	24136188	pharmaceutical	0	0	nonsteroidal anti-inflammatory drug
Buspirone	43165	+	Rattus	24136188	pharmaceutical	0	0	anxiolytic drug
Diethylhexyl Phthalate	43165	+	Mus	21318169	industrial	0	0	plasticizer
Dietary Fats	43165	+	Mus	19030233	food component	0	0	food
2',3,3',4',5-pentachloro-4-hydroxybiphenyl	43165	-	Rattus	19114083	industrial	pollutant	0	metabolit of PCB126
fipronil	43165	+	Rattus	23962444	agricultural	0	0	moderately hazardous pesticide
Toluene	43165	-	Rattus	22166486	industrial	drug of abuse	0	many uses as chemical intermediate, used as recreational drug
Valproic Acid	43165	-	Homo	25192806	pharmaceutical	0	0	treatment of epilepsy, bipolar disorder and migraine headaches
butyraldehyde	43165	-	Homo	26079696	industrial	0	0	intermediate in chemical industry
K 7174	43165	+	Homo	24086573	research	0	0	cell adhesion inhibitor, proteasome inhibitor
Plant Extracts	43165	+	Homo	23557933	pharmaceutical	0	0	various pharmaceutical
vorinostat	43165	-	Homo	27188386	pharmaceutical	0	0	inhibit histone deacetylases (HDAC)
Pregnenolone Carbonitrile	43165	+	Mus	28903501	research	0	0	Pregnenolone carbonitrile is a catatoxic steroid and microsomal enzyme inducer having significant effects on the induction of cytochrome P450. It has also demonstrated the potential for protective capability against acetaminophen-induced liver damage.
Antirheumatic Agents	43166	1	Homo	24449571	pharmaceutical	0	0	antirheumatic agents
Tetrachloroethylene	43166	+	Mus	28973375	industrial	0	0	solvent
Demecolcine	43166	+	Homo	23649840	pharmaceutical	research	0	used in chemotherapy
Copper Sulfate	43166	+	Homo	19549813	agricultural	0	0	fungicide and herbicide, niche uses
troglitazone	43166	-	Mus	28973697	pharmaceutical	0	0	antidiabetic and anti-inflammatory drug
Gentamicins	43166	+	Rattus	22061828	pharmaceutical	0	0	antibiotic
Isoproterenol	43166	+	Mus	20003209	pharmaceutical	0	0	used for heart disease
Coumestrol	43166	-	Homo	19167446	food component	0	0	natural organic present in vegetables, estrogenic activity
sodium arsenate	43166	-	Mus	21795629	industrial	agricultural	0	used in dyeing and printing, as insecticide
Valproic Acid	43166	1	Homo	25979313	pharmaceutical	0	0	treatment of epilepsy, bipolar disorder and migraine headaches
Benzo(a)pyrene	43166	+	Mus	22228805	pollutant	0	0	product of incomplete combustion of organic material
Ethinyl Estradiol	43166	+	Mus	17942748	pharmaceutical	0	0	used as birth control pill, mimics estrogen
Cadmium Chloride	43166	+	Rattus	19010381	industrial	0	0	multiple industrial applications
Nanotubes, Carbon	43166	-	Mus	25554681	industrial	0	0	multiple industrial applications
bisphenol A	43166	+	Rattus	25181051	industrial	0	0	monomer of polycarbonate plastic
jinfukang	43166	-	Homo	27392435	pharmaceutical	0	0	Chinese herbal medicine with potential immunopotentiation activity
sodium arsenate	43166	+	Mus	21795629	industrial	agricultural	0	used in dyeing and printing, as insecticide
cobaltous chloride	43166	+	Homo	19376846	industrial	0	0	moisture detector
Cocaine	43166	+	Homo	18000554	drug of abuse	0	0	recreational drug
propiconazole	43166	-	Mus	21278054	agricultural	0	0	demethylation inhibiting fungicide
tris(1,3-dichloro-2-propyl)phosphate	43166	+	Homo	26179874	industrial	0	0	Flame retardant
lead acetate	43166	+	Mus	21829687	industrial	food component	0	used in cosmetics, in vine adulteration
Phenobarbital	43166	-	Mus	23091169	pharmaceutical	0	0	treatment of epilepsy
Phenobarbital	43166	1	Homo	19159669	pharmaceutical	0	0	treatment of epilepsy
Aflatoxin B1	43166	+	Mus	19770486	pollutant	0	0	fungal toxin
Pentachlorophenol	43166	+	Mus	23892564	agricultural	industrial	0	pesticide and a disinfectant
4,4'-diaminodiphenylmethane	43166	-	Mus	18648102	industrial	0	0	precursor to polyurethanes
Plant Oils	43166	+	Homo	23370395	food component	0	0	food
Aflatoxin B1	43166	+	Homo	27153756	pollutant	0	0	fungal toxin
Cyclophosphamide	43166	-	Rattus	27281708	pharmaceutical	0	0	used as chemotherapy and to suppress the immune system
JP8 aviation fuel	43166	1	Homo	15476862	industrial	0	0	used in jet aircrafts, banned in 1995
Carbamazepine	43166	1	Homo	25979313	pharmaceutical	0	0	reatment of epilepsy and neuropathic pain
2,4-dinitrotoluene	43166	1	Rattus	21346803	industrial	0	0	precursor to toluene diisocyanate
Nanotubes, Carbon	43166	-	Mus	25554681	industrial	0	0	multiple industrial applications
dicrotophos	43166	-	Homo	28302478	agricultural	0	0	insecticide
Valproic Acid	43166	-	Homo	23179753	pharmaceutical	0	0	treatment of epilepsy, bipolar disorder and migraine headaches
Plant Extracts	43166	+	Homo	23557933	pharmaceutical	0	0	various pharmaceutical
Vincristine	43166	+	Homo	23649840	pharmaceutical	0	0	chemotherapy
trichostatin A	43166	1	Homo	28542535	pharmaceutical	research	0	inhibits the class I and II mammalian histone deacetylase (HDAC)
Benzo(a)pyrene	43166	+	Rattus	21839799	pollutant	0	0	product of incomplete combustion of organic material
Cisplatin	43167	+	Homo	27392435	pharmaceutical	0	0	chemotherapy medication
Benzo(a)pyrene	43167	+	Mus	22228805	pollutant	0	0	product of incomplete combustion of organic material
Air Pollutants	43167	-	Homo	21757418	pollutant	0	0	air pollutants
Methyl Methanesulfonate	43167	+	Homo	23649840	pharmaceutical	0	0	cancer terapy, alkylating agent
bisphenol A	43167	1	Rattus	25181051	industrial	0	0	monomer of polycarbonate plastic
Topotecan	43167	-	Rattus	25729387	pharmaceutical	0	0	chemotherapeutic agent that is a topoisomerase inhibitor
pirinixic acid	43167	+	Mus	23811191	research	0	0	peroxisome proliferator-activated receptor alpha (PPARa) agonist
pirinixic acid	43167	+	Mus	21318169	research	0	0	peroxisome proliferator-activated receptor alpha (PPARa) agonist
N-Methyl-3,4-methylenedioxyamphetamine	43167	+	Mus	26251327	pharmaceutical	0	0	recreational drug
vinclozolin	43167	-	Rattus	23034163	agricultural	0	0	fungicide
Formaldehyde	43167	+	Homo	23649840	industrial	research	cosmetics	multiple applications
K 7174	43167	+	Homo	24086573	research	0	0	cell adhesion inhibitor, proteasome inhibitor
Valproic Acid	43167	1	Mus	17963808	pharmaceutical	0	0	treatment of epilepsy, bipolar disorder and migraine headaches
bisphenol A	43167	+	Homo	29275510	industrial	0	0	monomer of polycarbonate plastic
Nanotubes, Carbon	43167	-	Mus	25620056	industrial	0	0	multiple industrial applications
Potassium Dichromate	43167	-	Mus	23608068	industrial	0	0	used as cleaning agent, as cenment component and in photography
oxaliplatin	43167	-	Rattus	25729387	pharmaceutical	0	0	treatment of colorectal cancer
Propylthiouracil	43167	-	Rattus	24780913	pharmaceutical	0	0	antithyroid
4-toluidine	43167	+	Rattus	27638505	industrial	0	0	precursor to the pesticides metolachlor and acetochlor, dyes, glue
methylmercuric chloride	43167	-	Homo	28001369	pollutant	0	0	naturally occuring or results from mining and other activities
Ethyl Methanesulfonate	43167	+	Homo	23649840	research	0	0	mutagen
Diuron	43167	+	Rattus	21551480	agricultural	0	0	algicide and herbicide, inhibitor of photosynthesis
bisphenol A	43168	-	Rattus	25181051	industrial	0	0	monomer of polycarbonate plastic
Valproic Acid	43168	+	Homo	23179753	pharmaceutical	0	0	treatment of epilepsy, bipolar disorder and migraine headaches
Tetrachlorodibenzodioxin	43168	1	Mus	26377647	pollutant	0	0	product of incomplete combustion of organic material
Valproic Acid	43168	+	Homo	27188386	pharmaceutical	0	0	treatment of epilepsy, bipolar disorder and migraine headaches
Valproic Acid	43168	+	Homo	29154799	pharmaceutical	0	0	treatment of epilepsy, bipolar disorder and migraine headaches
Paraquat	43168	-	Mus	22563483	agricultural	0	0	herbicide
Plant Extracts	43168	-	Homo	23557933	pharmaceutical	0	0	various pharmaceutical
Toluene	43168	-	Rattus	22967744	industrial	drug of abuse	0	many uses as chemical intermediate, used as recreational drug
Lead	43168	1	Homo	28903495	industrial	0	0	multiple applications
entinostat	43168	+	Homo	27188386	pharmaceutical	0	0	histone deacetylase inhibitor
Valproic Acid	43168	+	Mus	21427059	pharmaceutical	0	0	treatment of epilepsy, bipolar disorder and migraine headaches
Valproic Acid	43168	+	Homo	19101580	pharmaceutical	0	0	treatment of epilepsy, bipolar disorder and migraine headaches
pyridaben	43168	-	Mus	22563483	agricultural	0	0	miticide/insecticide
leflunomide	43168	-	Homo	28988120	pharmaceutical	0	0	used in active moderate-to-severe rheumatoid arthritis and psoriatic arthritis
Valproic Acid	43168	1	Homo	25979313	pharmaceutical	0	0	treatment of epilepsy, bipolar disorder and migraine headaches
Cisplatin	43168	-	Homo	27392435	pharmaceutical	0	0	chemotherapy medication
Vancomycin	43169	+	Mus	18930951	pharmaceutical	0	0	antibiotic
bisphenol A	43169	-	Rattus	25181051	industrial	0	0	monomer of polycarbonate plastic
Dietary Fats	43169	+	Mus	25016146	food component	0	0	food
Antirheumatic Agents	43170	+	Homo	24449571	pharmaceutical	0	0	antirheumatic agents
monobutyl phthalate	43170	-	Rattus	20864626	industrial	0	0	metabolit of plasticizer Dibutyl phthalate (DBP)
nickel monoxide	43170	-	Rattus	19167457	industrial	0	0	used in batteries
Tretinoin	43170	-	Homo	23724009	pharmaceutical	0	0	treatment of acne and acute promyelocytic leukemia
methoxyacetic acid	43170	-	Rattus	20864626	industrial	0	0	metabolite of ester phthalates widely used in industry as gelling, viscosity and stabilizer
lead nitrate	43170	-	Rattus	21628963	industrial	0	0	used in lead paints, currently heat stabiliser in nylon and polyesters, as a coating for photothermographic paper, and in rodenticides
Acrylamide	43170	-	Rattus	28959563	industrial	research	0	intermideate for polyacrylamide and acrylamide copolymers used in production of paper, dyes, and plastics, and in water treatment. Forms during cooking in starchy foods
fullerene C60	43170	-	Rattus	19167457	cosmetics	research	pharmaceutical	carbon nano-balls
2-monochloropropanediol	43170	-	Rattus	28522335	food component	0	0	occurs naturaly as byproduct of fermentation
alpha-Chlorohydrin	43170	-	Rattus	28522335	food component	0	0	created in foods during protein hydrolysis
Calcitriol	43170	+	Homo	21592394	pharmaceutical	0	0	vitamin D3
Endosulfan	43170	+	Rattus	29391264	agricultural	0	0	organochlorine insecticide
bisphenol A	43170	-	Rattus	25181051	industrial	0	0	monomer of polycarbonate plastic
Testosterone	43170	+	Homo	21592394	pharmaceutical	endobiotic	0	naturally occuring male hormone
Potassium Dichromate	43170	-	Mus	23608068	industrial	0	0	used as cleaning agent, as cenment component and in photography
Caffeine	43170	-	Rattus	20864626	food component	0	0	CNS stimulant, component of coffee, tea, cola
methylmercuric chloride	43170	-	Rattus	20864626	pollutant	0	0	naturally occuring or results from mining and other activities
entinostat	43170	-	Homo	27188386	pharmaceutical	0	0	histone deacetylase inhibitor
(+)-JQ1 compound	43344	-	Homo	23086925	research	0	0	BET bromodomain inhibitor
Dietary Fats	43344	+	Mus	25016146	food component	0	0	food
Asbestos, Serpentine	43344	+	Homo	21148743	industrial	0	0	insulating material
pirinixic acid	43344	-	Rattus	19162173	research	0	0	peroxisome proliferator-activated receptor alpha (PPARa) agonist
1,3-butadiene	43344	-	Mus	29038090	industrial	0	0	monomer in the production of synthetic rubber
2',3,3',4',5-pentachloro-4-hydroxybiphenyl	43344	-	Rattus	19114083	industrial	pollutant	0	metabolit of PCB126
decabromobiphenyl ether	43344	-	Rattus	23640034	industrial	0	0	flame retardent
Nickel	43344	+	Homo	25583101	industrial	0	0	multiple industrial applications
N-Methyl-3,4-methylenedioxyamphetamine	43344	-	Mus	20188158	pharmaceutical	0	0	recreational drug
bisphenol A	43344	-	Rattus	25181051	industrial	0	0	monomer of polycarbonate plastic
Gentamicins	43345	+	Rattus	22061828	pharmaceutical	0	0	antibiotic
Dietary Fats	43345	+	Mus	19030233	food component	0	0	food
Methylazoxymethanol Acetate	43345	+	Rattus	28349193	research	0	0	used to study schizophrenia and epilepsy
Aflatoxin B1	43345	+	Homo	27153756	pollutant	0	0	fungal toxin
methylmercuric chloride	43345	+	Homo	28001369	pollutant	0	0	naturally occuring or results from mining and other activities
4,4'-diaminodiphenylmethane	43345	-	Mus	18648102	industrial	0	0	precursor to polyurethanes
microcystin RR	43345	+	Homo	19111056	pollutant	0	0	produced by cynobacteria
JP8 aviation fuel	43345	-	Homo	16835149	industrial	0	0	used in jet aircrafts, banned in 1995
Hyaluronic Acid	43345	-	Rattus	23178681	pharmaceutical	cosmetics	endobiotic	present in body
indirubin	43345	-	Homo	15056799	research	0	0	byproduct of bacterial metabolism
Tetrachlorodibenzodioxin	43345	-	Homo	29704546	pollutant	0	0	product of incomplete combustion of organic material
Tobacco Smoke Pollution	43345	+	Mus	24486158	drug of abuse	pollutant	0	Tobacco smoke
Phthalic Acids	43345	+	Rattus	21061450	industrial	research	0	isomer of isophthalic acid and terephthalic acid
bisphenol A	43345	-	Mus	24909818	industrial	0	0	monomer of polycarbonate plastic
2-methyl-2H-pyrazole-3-carboxylic acid (2-methyl-4-o-tolylazophenyl)amide	43345	-	Homo	29704546	research	0	0	AhR inhibitor
cobaltous chloride	43345	-	Homo	19320972	industrial	0	0	moisture detector
Valproic Acid	43345	1	Homo	25979313	pharmaceutical	0	0	treatment of epilepsy, bipolar disorder and migraine headaches
Thioacetamide	43345	+	Rattus	23411599	research	0	0	source of sulfide ions
Plant Extracts	43345	+	Homo	23557933	pharmaceutical	0	0	various pharmaceutical
Cadmium Chloride	43345	+	Homo	12160620	industrial	0	0	multiple industrial applications
Ammonium Chloride	43345	1	Rattus	16483693	agricultural	0	0	fertilizer
Flutamide	43345	+	Rattus	24136188	pharmaceutical	0	0	nonsteroidal antiandrogen to treat prostate cancer
Cyclosporine	43345	-	Homo	25562108	pharmaceutical	0	0	immune suppressant
Cocaine	43345	1	Rattus	20187946	drug of abuse	0	0	recreational drug
2',3,3',4',5-pentachloro-4-hydroxybiphenyl	43345	-	Rattus	19114083	industrial	pollutant	0	metabolit of PCB126
Antirheumatic Agents	43345	+	Homo	24449571	pharmaceutical	0	0	antirheumatic agents
Heparin	43345	+	Rattus	17488504	pharmaceutical	0	0	blood anticoagulant
Diuron	43345	-	Rattus	25152437	agricultural	0	0	algicide and herbicide, inhibitor of photosynthesis
7,8-Dihydro-7,8-dihydroxybenzo(a)pyrene 9,10-oxide	43345	-	Homo	20018196	pollutant	0	0	metabolite of benzo(a)pyrene - product of incomplete combustion of organic material
Hydrogen Peroxide	43345	-	Rattus	23178681	industrial	0	0	industrial, pharmaceutical
Silicon Dioxide	43345	-	Homo	25351596	industrial	0	0	multiple industrial applications
bisphenol A	43345	+	Rattus	25181051	industrial	0	0	monomer of polycarbonate plastic
Oxygen	43346	+	Rattus	22911455	environment	0	0	air component
bisphenol A	43346	-	Rattus	25181051	industrial	0	0	monomer of polycarbonate plastic
Propylthiouracil	43346	+	Rattus	22504374	pharmaceutical	0	0	antithyroid
Cisplatin	43346	1	Homo	23300844	pharmaceutical	0	0	chemotherapy medication
Atrazine	43346	-	Homo	22378314	agricultural	0	0	herbicide
vorinostat	43346	-	Homo	27188386	pharmaceutical	0	0	inhibit histone deacetylases (HDAC)
Endosulfan	43346	+	Rattus	29391264	agricultural	0	0	organochlorine insecticide
indeno(1,2,3-cd)pyrene	43346	-	Mus	26377693	pollutant	0	0	no commercial production, presentin crude oil
butyraldehyde	43346	+	Homo	26079696	industrial	0	0	intermediate in chemical industry
scriptaid	43346	1	Homo	18813790	pharmaceutical	0	0	anticancer
fullerene C60	43346	-	Rattus	19167457	cosmetics	research	pharmaceutical	carbon nano-balls
pentanal	43346	+	Homo	26079696	food component	0	0	fruit flavors
nickel monoxide	43346	-	Rattus	19167457	industrial	0	0	used in batteries
decitabine	43346	1	Homo	23300844	pharmaceutical	0	0	treat blood related disorders
Nanotubes, Carbon	43346	1	Mus	25554681	industrial	0	0	multiple industrial applications
benzo(k)fluoranthene	43346	-	Mus	26377693	pollutant	0	0	product of incomplete combustion of organic material
Tobacco Smoke Pollution	43346	1	Mus	20133372	drug of abuse	pollutant	0	Tobacco smoke
ICG 001	43346	1	Homo	26191083	research	0	0	target Wnt-b signalling
C646 compound	43346	-	Homo	26191083	research	0	0	C646 was used to study the role of p300 in chronic neuropathic pain in rats with chronic constriction injury
propionaldehyde	43346	+	Homo	26079696	industrial	0	0	intermediate in chemical industry
Methamphetamine	43346	-	Rattus	19826936	pharmaceutical	0	0	drag to treat treating ADHD and obesity, used as recreational drug
Cisplatin	43346	+	Homo	27392435	pharmaceutical	0	0	chemotherapy medication
Ammonium Chloride	43346	1	Rattus	16483693	agricultural	0	0	fertilizer
Cuprizone	43346	-	Rattus	26577399	research	0	0	demyelination agent
jinfukang	43346	+	Homo	27392435	pharmaceutical	0	0	Chinese herbal medicine with potential immunopotentiation activity
pentabromodiphenyl ether	43346	-	Rattus	19954255	industrial	0	0	brominates flame retardent
Aldehydes	43346	+	Homo	25014914	industrial	0	0	multiple applications
benzo(b)fluoranthene	43346	-	Mus	26377693	industrial	pollutant	0	byproduct of combustion of organic material
Nanotubes, Carbon	43346	-	Mus	25554681	industrial	0	0	multiple industrial applications
Methimazole	43346	+	Rattus	22504374	pharmaceutical	0	0	used to treat hyperthyroidism
Valproic Acid	43347	+	Homo	24383497	pharmaceutical	0	0	treatment of epilepsy, bipolar disorder and migraine headaches
Silicon Dioxide	43347	-	Mus	23221170	industrial	0	0	multiple industrial applications
Methotrexate	43347	-	Rattus	16005536	pharmaceutical	0	0	treat cancer
Cisplatin	43347	-	Rattus	22023808	pharmaceutical	0	0	chemotherapy medication
Estradiol	43347	-	Mus	19484750	pharmaceutical	endobiotic	0	female reproductive hoormone
S-2-pentyl-4-pentynoic hydroxamic acid	43347	+	Mus	21427059	pharmaceutical	0	0	derivative of valproic acid - treatment of epilepsy, bipolar disorder and migraine headaches
Ketamine	43347	+	Rattus	20080153	pharmaceutical	0	0	sedative for anestheisa
Phenylmercuric Acetate	43347	-	Homo	26272509	agricultural	industrial	0	antifungal activity in agriculture and in leather processing
Valproic Acid	43347	+	Homo	28001369	pharmaceutical	0	0	treatment of epilepsy, bipolar disorder and migraine headaches
oxaliplatin	43347	+	Rattus	25729387	pharmaceutical	0	0	treatment of colorectal cancer
Aldehydes	43347	+	Homo	25014914	industrial	0	0	multiple applications
propiconazole	43347	-	Mus	21278054	agricultural	0	0	demethylation inhibiting fungicide
Cyclosporine	43347	+	Homo	27989131	pharmaceutical	0	0	immune suppressant
decitabine	43347	1	Homo	23300844	pharmaceutical	0	0	treat blood related disorders
Valproic Acid	43347	+	Mus	21427059	pharmaceutical	0	0	treatment of epilepsy, bipolar disorder and migraine headaches
propionaldehyde	43347	+	Homo	26079696	industrial	0	0	intermediate in chemical industry
Tretinoin	43347	+	Rattus	20488242	pharmaceutical	0	0	treatment of acne and acute promyelocytic leukemia
Cuprizone	43347	-	Rattus	27523638	research	0	0	demyelination agent
Acrylamide	43347	-	Rattus	28959563	industrial	research	0	intermideate for polyacrylamide and acrylamide copolymers used in production of paper, dyes, and plastics, and in water treatment. Forms during cooking in starchy foods
pyrachlostrobin	43347	+	Mus	27029645	agricultural	0	0	fungicide
indole-3-carbinol	43347	1	Rattus	21396975	food component	0	0	anticarcinogenic properties
butyraldehyde	43347	+	Homo	26079696	industrial	0	0	intermediate in chemical industry
Valproic Acid	43347	+	Mus	19136453	pharmaceutical	0	0	treatment of epilepsy, bipolar disorder and migraine headaches
Nickel	43347	-	Homo	25583101	industrial	0	0	multiple industrial applications
cupric chloride	43347	-	Mus	29617964	industrial	0	0	catalist in organic synthesis
Oxygen	43347	+	Homo	26516004	environment	0	0	air component
Propylthiouracil	43347	-	Rattus	24780913	pharmaceutical	0	0	antithyroid
Antirheumatic Agents	43347	+	Homo	24449571	pharmaceutical	0	0	antirheumatic agents
Valproic Acid	43347	1	Homo	25979313	pharmaceutical	0	0	treatment of epilepsy, bipolar disorder and migraine headaches
Valproic Acid	43347	+	Homo	29154799	pharmaceutical	0	0	treatment of epilepsy, bipolar disorder and migraine headaches
Cocaine	43347	-	Homo	16710320	drug of abuse	0	0	recreational drug
cobaltous chloride	43347	-	Rattus	24386269	industrial	0	0	moisture detector
Topotecan	43347	+	Rattus	25729387	pharmaceutical	0	0	chemotherapeutic agent that is a topoisomerase inhibitor
Cocaine	43347	-	Homo	12629581	drug of abuse	0	0	recreational drug
Benzo(a)pyrene	43347	-	Homo	22316170	pollutant	0	0	product of incomplete combustion of organic material
3,4,5,3',4'-pentachlorobiphenyl	43347	-	Rattus	23196670	industrial	0	0	flame retardant
entinostat	43347	+	Homo	27188386	pharmaceutical	0	0	histone deacetylase inhibitor
Cisplatin	43347	1	Homo	23300844	pharmaceutical	0	0	chemotherapy medication
Tetrachlorodibenzodioxin	43347	+	Homo	21296121	pollutant	0	0	product of incomplete combustion of organic material
Nanotubes, Carbon	43347	-	Mus	25554681	industrial	0	0	multiple industrial applications
Valproic Acid	43347	+	Homo	23179753	pharmaceutical	0	0	treatment of epilepsy, bipolar disorder and migraine headaches
Potassium Dichromate	43347	+	Mus	23608068	industrial	0	0	used as cleaning agent, as cenment component and in photography
Cocaine	43347	-	Homo	15009677	drug of abuse	0	0	recreational drug
Cisplatin	43347	+	Homo	27392435	pharmaceutical	0	0	chemotherapy medication
methylmercuric chloride	43347	-	Homo	28001369	pollutant	0	0	naturally occuring or results from mining and other activities
Propylthiouracil	43347	-	Rattus	25825206	pharmaceutical	0	0	antithyroid
Tobacco Smoke Pollution	43347	-	Homo	28065790	drug of abuse	pollutant	0	Tobacco smoke
pentanal	43347	+	Homo	26079696	food component	0	0	fruit flavors
perfluorooctanoic acid	43347	-	Rattus	19162173	industrial	0	0	surfactant
vinylidene chloride	43347	-	Mus	26682919	industrial	0	0	coating to other plastic films to increase their barrier properties
Tetrachlorodibenzodioxin	43347	+	Mus	19770486	pollutant	0	0	product of incomplete combustion of organic material
Aflatoxin B1	43347	+	Mus	19770486	pollutant	0	0	fungal toxin
Tobacco Smoke Pollution	43347	-	Mus	28111298	drug of abuse	pollutant	0	Tobacco smoke
jinfukang	43347	+	Homo	27392435	pharmaceutical	0	0	Chinese herbal medicine with potential immunopotentiation activity
Carbon Tetrachloride	43347	+	Mus	27339419	industrial	0	0	cleaning and other
Thioguanine	43347	-	Rattus	16005536	pharmaceutical	0	0	treats cancer, long term use prohibited
ochratoxin A	43347	-	Rattus	23358140	pollutant	0	0	produced by bacteria in food
Asbestos, Serpentine	43347	-	Homo	29523930	industrial	0	0	insulating material
bisphenol A	43347	-	Rattus	25181051	industrial	0	0	monomer of polycarbonate plastic
sodium bichromate	43347	1	Rattus	22110744	industrial	0	0	precursor for tunning solts of Cr
Heroin	43347	+	Homo	16710320	drug of abuse	pharmaceutical	0	recreational drug, pain medication
arsenic trioxide	43347	-	Homo	26705709	pharmaceutical	industrial	0	chemotherapeutic agent (leukemia), industrial intermediate
Acetaminophen	43347	-	Homo	29067470	pharmaceutical	0	0	painkiller
Crack Cocaine	43347	+	Homo	12629581	drug of abuse	0	0	recreational drug
Carmustine	43347	-	Rattus	16005536	pharmaceutical	0	0	chemotherapy
Nanotubes, Carbon	43347	-	Mus	25554681	industrial	0	0	multiple industrial applications
Valproic Acid	43347	+	Homo	26272509	pharmaceutical	0	0	treatment of epilepsy, bipolar disorder and migraine headaches
Nanotubes, Carbon	43347	-	Mus	25620056	industrial	0	0	multiple industrial applications
N-Methyl-3,4-methylenedioxyamphetamine	43348	+	Mus	20188158	pharmaceutical	0	0	recreational drug
Benzo(a)pyrene	43348	-	Mus	22610609	pollutant	0	0	product of incomplete combustion of organic material
Sarin	43348	+	Rattus	28973502	chemical warfare	0	0	chemical warfare
pentabromodiphenyl ether	43348	-	Rattus	19954255	industrial	0	0	brominates flame retardent
2',3,3',4',5-pentachloro-4-hydroxybiphenyl	43348	-	Rattus	19114083	industrial	pollutant	0	metabolit of PCB126
Vehicle Emissions	43348	+	Homo	28655636	pollutant	0	0	Air contaminants
1-Methyl-4-phenyl-1,2,3,6-tetrahydropyridine	43348	-	Mus	23562983	research	0	0	can induce parkinson disease in mouse models
pentabromodiphenyl ether	43348	+	Rattus	25616259	industrial	0	0	brominates flame retardent
Particulate Matter	43348	+	Homo	28655636	pollutant	0	0	Air contaminants
Ammonium Chloride	43348	1	Rattus	16483693	agricultural	0	0	fertilizer
Methamphetamine	43348	-	Rattus	19826936	pharmaceutical	0	0	drag to treat treating ADHD and obesity, used as recreational drug
bisphenol A	43348	-	Rattus	25181051	industrial	0	0	monomer of polycarbonate plastic
Tetrachlorodibenzodioxin	43348	1	Rattus	22298810	pollutant	0	0	product of incomplete combustion of organic material
(+)-JQ1 compound	43348	-	Homo	26752646	research	0	0	BET bromodomain inhibitor
Dietary Fats	43348	+	Mus	25016146	food component	0	0	food
propionaldehyde	43348	+	Homo	26079696	industrial	0	0	intermediate in chemical industry
Nickel	43348	1	Homo	14575637	industrial	0	0	multiple industrial applications
Cisplatin	43348	+	Homo	27392435	pharmaceutical	0	0	chemotherapy medication
Phenylephrine	43348	+	Rattus	18158353	pharmaceutical	0	0	used primarily as a decongestant
Endosulfan	43348	+	Rattus	29391264	agricultural	0	0	organochlorine insecticide
Propylthiouracil	43349	+	Rattus	24780913	pharmaceutical	0	0	antithyroid
trichostatin A	43349	+	Homo	26272509	pharmaceutical	research	0	inhibits the class I and II mammalian histone deacetylase (HDAC)
bisphenol A	43349	+	Mus	26063408	industrial	0	0	monomer of polycarbonate plastic
Ethyl Methanesulfonate	43349	-	Homo	23649840	research	0	0	mutagen
Formaldehyde	43349	-	Homo	23649840	industrial	research	cosmetics	multiple applications
belinostat	43349	+	Homo	26272509	pharmaceutical	0	0	treats cancer
Nanotubes, Carbon	43349	-	Mus	25554681	industrial	0	0	multiple industrial applications
Nickel	43349	+	Homo	25583101	industrial	0	0	multiple industrial applications
Benzo(a)pyrene	43349	+	Mus	22228805	pollutant	0	0	product of incomplete combustion of organic material
Valproic Acid	43349	+	Homo	25192806	pharmaceutical	0	0	treatment of epilepsy, bipolar disorder and migraine headaches
Cyclosporine	43349	-	Homo	25562108	pharmaceutical	0	0	immune suppressant
hexabromocyclododecane	43349	1	Mus	24680724	industrial	0	0	flame retardant
Valproic Acid	43349	+	Homo	28001369	pharmaceutical	0	0	treatment of epilepsy, bipolar disorder and migraine headaches
pirinixic acid	43349	+	Mus	20813756	research	0	0	peroxisome proliferator-activated receptor alpha (PPARa) agonist
Vincristine	43349	-	Homo	23649840	pharmaceutical	0	0	chemotherapy
Cyclosporine	43349	-	Homo	27989131	pharmaceutical	0	0	immune suppressant
Tetrachlorodibenzodioxin	43349	-	Mus	19465110	pollutant	0	0	product of incomplete combustion of organic material
Silver	43349	-	Mus	27131904	industrial	0	0	many applications
propionaldehyde	43349	+	Homo	26079696	industrial	0	0	intermediate in chemical industry
Benzo(a)pyrene	43349	-	Mus	21569818	pollutant	0	0	product of incomplete combustion of organic material
Valproic Acid	43349	+	Homo	24383497	pharmaceutical	0	0	treatment of epilepsy, bipolar disorder and migraine headaches
N-Methyl-3,4-methylenedioxyamphetamine	43349	+	Mus	20188158	pharmaceutical	0	0	recreational drug
Valproic Acid	43349	+	Homo	26272509	pharmaceutical	0	0	treatment of epilepsy, bipolar disorder and migraine headaches
p-Chloromercuribenzoic Acid	43349	-	Homo	26272509	research	0	0	protease inhibitor
Nickel	43349	+	Homo	24768652	industrial	0	0	multiple industrial applications
vorinostat	43349	+	Homo	27188386	pharmaceutical	0	0	inhibit histone deacetylases (HDAC)
Soman	43349	+	Rattus	19281266	chemical warfare	0	0	chemical warfare
1,3-butadiene	43349	-	Mus	29038090	industrial	0	0	monomer in the production of synthetic rubber
Acetaminophen	43349	-	Homo	29067470	pharmaceutical	0	0	painkiller
Cyclosporine	43349	-	Homo	20106945	pharmaceutical	0	0	immune suppressant
Aflatoxin B1	43349	-	Mus	19770486	pollutant	0	0	fungal toxin
Valproic Acid	43349	1	Homo	25979313	pharmaceutical	0	0	treatment of epilepsy, bipolar disorder and migraine headaches
Soman	43349	-	Rattus	19281266	chemical warfare	0	0	chemical warfare
methylmercuric chloride	43349	-	Homo	28001369	pollutant	0	0	naturally occuring or results from mining and other activities
entinostat	43349	+	Homo	27188386	pharmaceutical	0	0	histone deacetylase inhibitor
bisphenol A	43349	-	Rattus	25181051	industrial	0	0	monomer of polycarbonate plastic
Phenylmercuric Acetate	43349	-	Homo	26272509	agricultural	industrial	0	antifungal activity in agriculture and in leather processing
Cuprizone	43349	-	Rattus	26577399	research	0	0	demyelination agent
trichostatin A	43349	1	Homo	28542535	pharmaceutical	research	0	inhibits the class I and II mammalian histone deacetylase (HDAC)
Valproic Acid	43349	+	Homo	23179753	pharmaceutical	0	0	treatment of epilepsy, bipolar disorder and migraine headaches
Chloroprene	43349	-	Mus	23125180	industrial	0	0	production of neoprene
jinfukang	43349	+	Homo	27392435	pharmaceutical	0	0	Chinese herbal medicine with potential immunopotentiation activity
Methyl Methanesulfonate	43349	-	Homo	23649840	pharmaceutical	0	0	cancer terapy, alkylating agent
Cadmium	43349	-	Homo	24376830	industrial	0	0	multiple applications, contaminates food and water
Antirheumatic Agents	43349	-	Homo	24449571	pharmaceutical	0	0	antirheumatic agents
Diuron	43349	+	Rattus	21551480	agricultural	0	0	algicide and herbicide, inhibitor of photosynthesis
Thioacetamide	43349	-	Rattus	23411599	research	0	0	source of sulfide ions
Dietary Fats	43349	-	Mus	19030233	food component	0	0	food
bromfenacoum	43349	-	Rattus	28903499	pharmaceutical	0	0	NSAID
tris(1,3-dichloro-2-propyl)phosphate	43349	-	Homo	26179874	industrial	0	0	Flame retardant
Valproic Acid	43349	+	Homo	27188386	pharmaceutical	0	0	treatment of epilepsy, bipolar disorder and migraine headaches
panobinostat	43349	+	Homo	26272509	pharmaceutical	0	0	Anticancer drug, histone deacetylase inhibitor
sulforafan	43349	-	Homo	26833863	food component	0	0	occurs naturally in brocoli sprouts
trichostatin A	43349	+	Homo	24935251	pharmaceutical	research	0	inhibits the class I and II mammalian histone deacetylase (HDAC)
Nanotubes, Carbon	43349	-	Mus	25554681	industrial	0	0	multiple industrial applications
troglitazone	43349	-	Mus	17569031	pharmaceutical	0	0	antidiabetic and anti-inflammatory drug
entinostat	43349	+	Homo	26272509	pharmaceutical	0	0	histone deacetylase inhibitor
7,8-Dihydro-7,8-dihydroxybenzo(a)pyrene 9,10-oxide	43350	+	Homo	20382639	pollutant	0	0	metabolite of benzo(a)pyrene - product of incomplete combustion of organic material
nickel chloride	43350	1	Rattus	22546817	industrial	0	0	most important source of nickel
1-Methyl-4-phenylpyridinium	43350	+	Homo	24675778	agricultural	0	0	herbicide, research
Pentachlorophenol	43350	+	Mus	23892564	agricultural	industrial	0	pesticide and a disinfectant
Flutamide	43350	+	Rattus	24136188	pharmaceutical	0	0	nonsteroidal antiandrogen to treat prostate cancer
vinclozolin	43350	+	Rattus	23869203	agricultural	0	0	fungicide
Cadmium Chloride	43350	+	Homo	12160620	industrial	0	0	multiple industrial applications
Antirheumatic Agents	43350	+	Homo	24449571	pharmaceutical	0	0	antirheumatic agents
bisphenol A	43350	1	Rattus	25181051	industrial	0	0	monomer of polycarbonate plastic
Buspirone	43350	-	Rattus	24136188	pharmaceutical	0	0	anxiolytic drug
dicrotophos	43350	-	Homo	28302478	agricultural	0	0	insecticide
Dieldrin	43350	1	Rattus	22546817	agricultural	0	0	pesticide
Nanotubes, Carbon	43350	1	Mus	21135415	industrial	0	0	multiple industrial applications
GSK-J4	43350	+	Homo	29301935	research	0	0	jumonji H3K27 demethylase inhibitor
Cadmium Chloride	43350	+	Homo	26472689	industrial	0	0	multiple industrial applications
Morphine	43350	-	Rattus	23056601	pharmaceutical	drug of abuse	0	pain medication, recreational drug
vinclozolin	43350	+	Rattus	23034163	agricultural	0	0	fungicide
Silicon Dioxide	43350	-	Homo	25895662	industrial	0	0	multiple industrial applications
nimesulide	43350	-	Rattus	24136188	pharmaceutical	0	0	nonsteroidal anti-inflammatory drug
Lead	43350	1	Homo	28903495	industrial	0	0	multiple applications
arsenic trioxide	43350	+	Homo	20458559	pharmaceutical	industrial	0	chemotherapeutic agent (leukemia), industrial intermediate
1-Methyl-4-phenyl-1,2,3,6-tetrahydropyridine	43350	+	Mus	20230807	research	0	0	can induce parkinson disease in mouse models
jinfukang	43350	-	Homo	27392435	pharmaceutical	0	0	Chinese herbal medicine with potential immunopotentiation activity
bromovanin	43350	-	Homo	21419150	food component	0	0	derivative of vinnila
Ammonium Chloride	43350	1	Rattus	16483693	agricultural	0	0	fertilizer
2',3,3',4',5-pentachloro-4-hydroxybiphenyl	43350	-	Rattus	19114083	industrial	pollutant	0	metabolit of PCB126
Fenretinide	43350	-	Mus	28973697	pharmaceutical	0	0	treatment of cancer
Dronabinol	43351	+	Mus	18584336	pharmaceutical	0	0	control of nausea and vomiting
Cocaine	43351	-	Rattus	25100957	drug of abuse	0	0	recreational drug
benzo(k)fluoranthene	43351	+	Mus	26377693	pollutant	0	0	product of incomplete combustion of organic material
Valproic Acid	43351	1	Mus	17292431	pharmaceutical	0	0	treatment of epilepsy, bipolar disorder and migraine headaches
vinylidene chloride	43351	+	Mus	26682919	industrial	0	0	coating to other plastic films to increase their barrier properties
Microcystins	43351	+	Rattus	22430071	pollutant	0	0	produced by bacteria in water
Cuprizone	43351	-	Rattus	27523638	research	0	0	demyelination agent
GSK-J4	43351	-	Homo	29301935	research	0	0	jumonji H3K27 demethylase inhibitor
tris(1,3-dichloro-2-propyl)phosphate	43351	-	Homo	26179874	industrial	0	0	Flame retardant
Valproic Acid	43351	1	Homo	25979313	pharmaceutical	0	0	treatment of epilepsy, bipolar disorder and migraine headaches
Valproic Acid	43351	+	Homo	23179753	pharmaceutical	0	0	treatment of epilepsy, bipolar disorder and migraine headaches
Thioacetamide	43351	+	Rattus	23411599	research	0	0	source of sulfide ions
cupric chloride	43351	-	Mus	29617964	industrial	0	0	catalist in organic synthesis
benzo(b)fluoranthene	43351	+	Mus	26377693	industrial	pollutant	0	byproduct of combustion of organic material
Ethyl Methanesulfonate	43351	+	Homo	23649840	research	0	0	mutagen
bisphenol A	43351	1	Rattus	25181051	industrial	0	0	monomer of polycarbonate plastic
Endosulfan	43351	-	Rattus	29391264	agricultural	0	0	organochlorine insecticide
butyraldehyde	43351	-	Homo	26079696	industrial	0	0	intermediate in chemical industry
oxaliplatin	43351	-	Rattus	25729387	pharmaceutical	0	0	treatment of colorectal cancer
Cisplatin	43351	+	Homo	27392435	pharmaceutical	0	0	chemotherapy medication
methylmercuric chloride	43351	-	Homo	28001369	pollutant	0	0	naturally occuring or results from mining and other activities
pyrachlostrobin	43351	+	Mus	27029645	agricultural	0	0	fungicide
Propylthiouracil	43351	-	Rattus	24780913	pharmaceutical	0	0	antithyroid
Nickel	43351	-	Homo	25583101	industrial	0	0	multiple industrial applications
Gold	43351	-	Mus	24780912	industrial	0	0	multiple applications
cobaltous chloride	43351	-	Homo	19320972	industrial	0	0	moisture detector
Coumestrol	43351	+	Homo	19167446	food component	0	0	natural organic present in vegetables, estrogenic activity
Cyclosporine	43351	-	Homo	25562108	pharmaceutical	0	0	immune suppressant
Benzo(a)pyrene	43351	-	Mus	19770486	pollutant	0	0	product of incomplete combustion of organic material
Zinc Sulfate	43351	-	Homo	19013360	food component	0	0	supplement for zinc deficiency
Valproic Acid	43351	+	Homo	26272509	pharmaceutical	0	0	treatment of epilepsy, bipolar disorder and migraine headaches
Valproic Acid	43351	+	Homo	24383497	pharmaceutical	0	0	treatment of epilepsy, bipolar disorder and migraine headaches
furan	43351	+	Rattus	27387713	pollutant	0	0	thermal degradation of natural food constituents
Fenretinide	43351	-	Mus	28973697	pharmaceutical	0	0	treatment of cancer
Rifampin	43351	+	Homo	24552687	pharmaceutical	0	0	antibiotic
Tamoxifen	43351	+	Mus	25123088	pharmaceutical	0	0	prevent breast cancer
Soman	43351	-	Rattus	19281266	chemical warfare	0	0	chemical warfare
vorinostat	43351	-	Homo	27188386	pharmaceutical	0	0	inhibit histone deacetylases (HDAC)
Topotecan	43351	-	Rattus	25729387	pharmaceutical	0	0	chemotherapeutic agent that is a topoisomerase inhibitor
Methyl Methanesulfonate	43351	+	Homo	23649840	pharmaceutical	0	0	cancer terapy, alkylating agent
monobutyl phthalate	43352	1	Rattus	20864626	industrial	0	0	metabolit of plasticizer Dibutyl phthalate (DBP)
(+)-JQ1 compound	43352	-	Homo	23086925	research	0	0	BET bromodomain inhibitor
Lead	43352	-	Homo	19921347	industrial	0	0	multiple applications
Valproic Acid	43352	1	Mus	20421339	pharmaceutical	0	0	treatment of epilepsy, bipolar disorder and migraine headaches
methoxyacetic acid	43352	1	Mus	20421339	industrial	0	0	metabolite of ester phthalates widely used in industry as gelling, viscosity and stabilizer
Flutamide	43352	+	Rattus	24136188	pharmaceutical	0	0	nonsteroidal antiandrogen to treat prostate cancer
Benzo(a)pyrene	43352	-	Homo	20097212	pollutant	0	0	product of incomplete combustion of organic material
Tetrachlorodibenzodioxin	43352	+	Mus	20819909	pollutant	0	0	product of incomplete combustion of organic material
monobutyl phthalate	43352	1	Mus	20421339	industrial	0	0	metabolit of plasticizer Dibutyl phthalate (DBP)
Nanotubes, Carbon	43352	-	Mus	25620056	industrial	0	0	multiple industrial applications
bisphenol A	43352	1	Rattus	25181051	industrial	0	0	monomer of polycarbonate plastic
Valproic Acid	43352	1	Homo	25979313	pharmaceutical	0	0	treatment of epilepsy, bipolar disorder and migraine headaches
Thimerosal	43352	-	Homo	27188386	pharmaceutical	0	0	antiseptic and antifungal agent
Finasteride	43352	+	Rattus	24136188	pharmaceutical	0	0	used for hormone therapy
Tretinoin	43352	1	Mus	20421339	pharmaceutical	0	0	treatment of acne and acute promyelocytic leukemia
2,6-dinitrotoluene	43352	1	Rattus	21346803	industrial	0	0	intermediate in production of polyuretane foams, plasticiser
chloropicrin	43352	1	Homo	26352163	agricultural	chemical warfare	0	used as a broad-spectrum antimicrobial, fungicide, herbicide, insecticide, and nematicide
Soman	43352	-	Rattus	19281266	chemical warfare	0	0	chemical warfare
Propylthiouracil	43352	+	Rattus	24780913	pharmaceutical	0	0	antithyroid
Ammonium Chloride	43352	1	Rattus	16483693	agricultural	0	0	fertilizer
Tobacco Smoke Pollution	43352	-	Homo	28065790	drug of abuse	pollutant	0	Tobacco smoke
Dibutyl Phthalate	43352	+	Rattus	21266533	industrial	0	0	plasticizer
Dibutyl Phthalate	43352	-	Rattus	21266533	industrial	0	0	plasticizer
bis-N,N-dimethylamino-2-(N-methylpyrrolyl)methyl cyclopentadienyl titanium (IV)	43352	-	Homo	20162321	pharmaceutical	research	0	anticancer drug
Dopamine	43352	-	Homo	24675778	pharmaceutical	endobiotic	0	neurotransmitter
Nanotubes, Carbon	43352	-	Mus	25620056	industrial	0	0	multiple industrial applications
Fluorouracil	43352	1	Mus	20421339	pharmaceutical	0	0	anticancer drug
Cadmium Chloride	43352	+	Homo	24527689	industrial	0	0	multiple industrial applications
Buspirone	43352	-	Rattus	24136188	pharmaceutical	0	0	anxiolytic drug
pantogab	43352	-	Mus	17379144	pharmaceutical	0	0	drug for neurological, psychological and psychiatric conditions
Sodium Fluoride	43352	-	Mus	28918527	food component	industrial	agricultural	added to drinking water to maintain dental health, used as cleaning agent, in chemical synthesis and metallurgy and as insecticide
K 7174	43352	-	Homo	24086573	research	0	0	cell adhesion inhibitor, proteasome inhibitor
BEP protocol	43352	+	Rattus	18987330	pharmaceutical	0	0	used as combination of multi drugs to treat cancer
Copper Sulfate	43352	+	Mus	18579281	agricultural	0	0	fungicide and herbicide, niche uses
dicrotophos	43352	+	Homo	28302478	agricultural	0	0	insecticide
Aldrin	43352	+	Mus	18579281	agricultural	0	0	insecticide
Estradiol	43352	+	Homo	23019147	pharmaceutical	endobiotic	0	female reproductive hoormone
Soman	43352	+	Rattus	19281266	chemical warfare	0	0	chemical warfare
butyraldehyde	43352	-	Homo	26079696	industrial	0	0	intermediate in chemical industry
Benzo(a)pyrene	43352	-	Mus	19770486	pollutant	0	0	product of incomplete combustion of organic material
Tobacco Smoke Pollution	43352	-	Homo	22363418	drug of abuse	pollutant	0	Tobacco smoke
Coumestrol	43352	+	Homo	19167446	food component	0	0	natural organic present in vegetables, estrogenic activity
Copper Sulfate	43352	-	Homo	19549813	agricultural	0	0	fungicide and herbicide, niche uses
bisphenol A	43353	-	Rattus	25181051	industrial	0	0	monomer of polycarbonate plastic
Cyclosporine	43353	-	Homo	25562108	pharmaceutical	0	0	immune suppressant
Buspirone	43353	-	Rattus	24136188	pharmaceutical	0	0	anxiolytic drug
Potassium Dichromate	43353	+	Homo	23718831	industrial	0	0	used as cleaning agent, as cenment component and in photography
Silicon Dioxide	43353	-	Homo	25351596	industrial	0	0	multiple industrial applications
Acrylamide	43353	-	Rattus	28959563	industrial	research	0	intermideate for polyacrylamide and acrylamide copolymers used in production of paper, dyes, and plastics, and in water treatment. Forms during cooking in starchy foods
Aflatoxin B1	43353	+	Homo	27153756	pollutant	0	0	fungal toxin
Propylthiouracil	43353	+	Rattus	24780913	pharmaceutical	0	0	antithyroid
Sulindac	43353	-	Rattus	24136188	pharmaceutical	0	0	NSAID
Finasteride	43353	+	Rattus	24136188	pharmaceutical	0	0	used for hormone therapy
Diuron	43353	+	Rattus	21551480	agricultural	0	0	algicide and herbicide, inhibitor of photosynthesis
Valproic Acid	43353	1	Homo	25979313	pharmaceutical	0	0	treatment of epilepsy, bipolar disorder and migraine headaches
Valproic Acid	43353	-	Homo	23179753	pharmaceutical	0	0	treatment of epilepsy, bipolar disorder and migraine headaches
trichostatin A	43353	-	Homo	26272509	pharmaceutical	research	0	inhibits the class I and II mammalian histone deacetylase (HDAC)
Benzo(a)pyrene	43353	-	Mus	19770486	pollutant	0	0	product of incomplete combustion of organic material
Valproic Acid	43353	-	Homo	27188386	pharmaceutical	0	0	treatment of epilepsy, bipolar disorder and migraine headaches
furan	43353	+	Rattus	25539665	pollutant	0	0	thermal degradation of natural food constituents
Copper Sulfate	43353	+	Homo	19549813	agricultural	0	0	fungicide and herbicide, niche uses
Cephaloridine	43353	-	Rattus	18500788	pharmaceutical	0	0	Antibiotic
Tetrachlorodibenzodioxin	43353	1	Mus	26377647	pollutant	0	0	product of incomplete combustion of organic material
Antirheumatic Agents	43353	+	Homo	24449571	pharmaceutical	0	0	antirheumatic agents
glycidol	43353	-	Rattus	24395379	industrial	0	0	used in surface coatings, chemical synthesis, pharmaceuticals, sanitary chemicals and sterilizing milk of magnesia, and as a gelation agent in solid propellants
K 7174	43353	+	Homo	24086573	research	0	0	cell adhesion inhibitor, proteasome inhibitor
troglitazone	43354	+	Mus	28973697	pharmaceutical	0	0	antidiabetic and anti-inflammatory drug
Tretinoin	43354	-	Homo	15498508	pharmaceutical	0	0	treatment of acne and acute promyelocytic leukemia
Tetrachlorodibenzodioxin	43354	+	Mus	25270620	pollutant	0	0	product of incomplete combustion of organic material
methylmercuric chloride	43354	+	Homo	26272509	pollutant	0	0	naturally occuring or results from mining and other activities
Phenylmercuric Acetate	43354	+	Homo	26272509	agricultural	industrial	0	antifungal activity in agriculture and in leather processing
Eugenol	43354	-	Homo	17374397	cosmetics	industrial	pharmaceutical	used in perfumes, flavorings, essential oils, as a local antiseptic and anaesthetic
Estradiol	43354	+	Mus	19484750	pharmaceutical	endobiotic	0	female reproductive hoormone
tetrahydropalmatine	43354	-	Homo	20109541	pharmaceutical	0	0	present in plants, used iin traditional chinese medicine can be poisnous
resveratrol	43354	-	Mus	25505154	food component	0	0	food additive, antioxidant, found in grapes
Valproic Acid	43354	1	Mus	17963808	pharmaceutical	0	0	treatment of epilepsy, bipolar disorder and migraine headaches
Glafenine	43354	+	Rattus	24136188	pharmaceutical	0	0	nonsteroidal anti-inflammatory drug
cobaltous chloride	43354	-	Homo	19376846	industrial	0	0	moisture detector
vinclozolin	43354	+	Rattus	23555832	agricultural	0	0	fungicide
Benzo(a)pyrene	43354	-	Mus	19770486	pollutant	0	0	product of incomplete combustion of organic material
tamibarotene	43354	-	Homo	15498508	pharmaceutical	0	0	synthetic retinoid, developed to overcome all-trans retinoic acid (ATRA) resistance
microcystin RR	43354	+	Homo	19111056	pollutant	0	0	produced by cynobacteria
Hyaluronic Acid	43354	-	Rattus	23178681	pharmaceutical	cosmetics	endobiotic	present in body
bisphenol A	43354	+	Rattus	25181051	industrial	0	0	monomer of polycarbonate plastic
Aflatoxin B1	43354	-	Mus	19770486	pollutant	0	0	fungal toxin
Microcystins	43354	-	Rattus	22430071	pollutant	0	0	produced by bacteria in water
Pregnenolone Carbonitrile	43354	-	Mus	28903501	research	0	0	Pregnenolone carbonitrile is a catatoxic steroid and microsomal enzyme inducer having significant effects on the induction of cytochrome P450. It has also demonstrated the potential for protective capability against acetaminophen-induced liver damage.
tamibarotene	43354	1	Homo	15498508	pharmaceutical	0	0	synthetic retinoid, developed to overcome all-trans retinoic acid (ATRA) resistance
Oxazolone	43354	-	Homo	17374397	pharmaceutical	0	0	investigated for many different medical applications
Methyl Methanesulfonate	43354	-	Homo	23649840	pharmaceutical	0	0	cancer terapy, alkylating agent
Tobacco Smoke Pollution	43354	-	Mus	28111298	drug of abuse	pollutant	0	Tobacco smoke
bromovanin	43354	-	Homo	21419150	food component	0	0	derivative of vinnila
Tobacco Smoke Pollution	43354	-	Homo	28065790	drug of abuse	pollutant	0	Tobacco smoke
torcetrapib	43354	+	Homo	23228038	pharmaceutical	0	0	drug to treat hypercholesterolemia and prevent cardiovascular disease
Zinc Sulfate	43354	-	Homo	12756304	food component	0	0	supplement for zinc deficiency
bisphenol A	43354	-	Homo	27685785	industrial	0	0	monomer of polycarbonate plastic
Nanotubes, Carbon	43354	+	Mus	25554681	industrial	0	0	multiple industrial applications
Testosterone	43354	-	Mus	20403060	pharmaceutical	endobiotic	0	naturally occuring male hormone
Cyclosporine	43354	-	Homo	25562108	pharmaceutical	0	0	immune suppressant
Microcystins	43354	+	Rattus	22430071	pollutant	0	0	produced by bacteria in water
pentabromodiphenyl ether	43354	+	Rattus	19954255	industrial	0	0	brominates flame retardent
Tetrachlorodibenzodioxin	43354	+	Mus	19770486	pollutant	0	0	product of incomplete combustion of organic material
cobaltous chloride	43354	-	Homo	19320972	industrial	0	0	moisture detector
Antirheumatic Agents	43354	+	Homo	24449571	pharmaceutical	0	0	antirheumatic agents
Hydrogen Peroxide	43354	-	Rattus	23178681	industrial	0	0	industrial, pharmaceutical
Endosulfan	43354	+	Rattus	29391264	agricultural	0	0	organochlorine insecticide
Isotretinoin	43354	-	Homo	20436886	pharmaceutical	0	0	used to treat Acne and skin diseases
nickel sulfate	43354	-	Homo	17374397	industrial	0	0	electroplating of nickel
alpha-Chlorohydrin	43354	+	Rattus	28522335	food component	0	0	created in foods during protein hydrolysis
Tretinoin	43355	+	Homo	23724009	pharmaceutical	0	0	treatment of acne and acute promyelocytic leukemia
Sodium Fluoride	43355	+	Mus	28918527	food component	industrial	agricultural	added to drinking water to maintain dental health, used as cleaning agent, in chemical synthesis and metallurgy and as insecticide
bisphenol A	43355	-	Rattus	25181051	industrial	0	0	monomer of polycarbonate plastic
Potassium Dichromate	43355	+	Mus	23608068	industrial	0	0	used as cleaning agent, as cenment component and in photography
N-Methyl-3,4-methylenedioxyamphetamine	43357	+	Mus	26251327	pharmaceutical	0	0	recreational drug
bisphenol A	43357	+	Mus	26063408	industrial	0	0	monomer of polycarbonate plastic
MT19c compound	43357	+	Homo	21781307	research	0	0	Vitamin D 3 derivative
Plant Extracts	43357	+	Homo	23557933	pharmaceutical	0	0	various pharmaceutical
Potassium Dichromate	43357	+	Mus	23608068	industrial	0	0	used as cleaning agent, as cenment component and in photography
Air Pollutants	43357	-	Homo	21757418	pollutant	0	0	air pollutants
butyraldehyde	43357	-	Homo	26079696	industrial	0	0	intermediate in chemical industry
bisphenol A	43357	-	Rattus	25181051	industrial	0	0	monomer of polycarbonate plastic
Acetaminophen	43357	+	Homo	22230336	pharmaceutical	0	0	painkiller
Silicon Dioxide	43357	-	Homo	23806026	industrial	0	0	multiple industrial applications
Asbestos, Serpentine	43435	-	Homo	21148743	industrial	0	0	insulating material
testosterone-3-carboxymethyloxime-bovine serum albumin conjugate	43435	-	Homo	20189893	research	0	0	used for flow cytometric assays in serum-free cell cultures
Soot	9130022000000000	-	Mus	26551751	pollutant	0	0	air pollutant
Nanotubes, Carbon	9130022000000000	-	Mus	25554681	industrial	0	0	multiple industrial applications
Dietary Fats	9130022000000000	-	Mus	25016146	food component	0	0	food
Valproic Acid	2810047C21RIK1	+	Mus	24896083	pharmaceutical	0	0	treatment of epilepsy, bipolar disorder and migraine headaches
Nanotubes, Carbon	3830612M24	+	Mus	25554681	industrial	0	0	multiple industrial applications
Nanotubes, Carbon	4731420N21	-	Mus	25554681	industrial	0	0	multiple industrial applications
Testosterone	5430421B17	-	Mus	20403060	pharmaceutical	endobiotic	0	naturally occuring male hormone
Dietary Fats	5430421B17	+	Mus	19467301	food component	0	0	food
Benzo(a)pyrene	A	+	Mus	20127859	pollutant	0	0	product of incomplete combustion of organic material
Sodium Fluoride	A	-	Mus	27862939	food component	industrial	agricultural	added to drinking water to maintain dental health, used as cleaning agent, in chemical synthesis and metallurgy and as insecticide
Aflatoxin B1	A1BG	+	Rattus	23630614	pollutant	0	0	fungal toxin
Tamoxifen	A1BG	-	Mus	25123088	pharmaceutical	0	0	prevent breast cancer
Aflatoxin B1	A1BG	-	Homo	27153756	pollutant	0	0	fungal toxin
1,4-bis(2-(3,5-dichloropyridyloxy))benzene	A1BG	-	Mus	21354444	research	0	0	potent CAR ligand
Tetrachlorodibenzodioxin	A1BG	1	Homo	22574217	pollutant	0	0	product of incomplete combustion of organic material
Valproic Acid	A1BG	1	Mus	17963808	pharmaceutical	0	0	treatment of epilepsy, bipolar disorder and migraine headaches
pirinixic acid	A1BG	-	Mus	23811191	research	0	0	peroxisome proliferator-activated receptor alpha (PPARa) agonist
Nanotubes, Carbon	A1BG	1	Mus	25620056	industrial	0	0	multiple industrial applications
Cyclosporine	A1BG	+	Homo	27989131	pharmaceutical	0	0	immune suppressant
bisphenol A	A1BG	-	Rattus	20219716	industrial	0	0	monomer of polycarbonate plastic
pirinixic acid	A1BG	+	Mus	20813756	research	0	0	peroxisome proliferator-activated receptor alpha (PPARa) agonist
Aldehydes	A1BG	+	Homo	25014914	industrial	0	0	multiple applications
Quercetin	A1BG	+	Homo	21632981	food component	0	0	food additive
Tretinoin	A1BG	-	Homo	23724009	pharmaceutical	0	0	treatment of acne and acute promyelocytic leukemia
pentanal	A1BG	+	Homo	26079696	food component	0	0	fruit flavors
mercuric bromide	A1BG	-	Homo	26272509	research	0	0	has applications in acousto-optical devices
butyraldehyde	A1BG	+	Homo	26079696	industrial	0	0	intermediate in chemical industry
1,4-bis(2-(3,5-dichloropyridyloxy))benzene	A1BG	+	Mus	28903501	research	0	0	potent CAR ligand
Mercury	A1BG	1	Homo	22030286	industrial	0	0	multiple applications
bisphenol A	A1BG	-	Rattus	22649256	industrial	0	0	monomer of polycarbonate plastic
Ammonium Chloride	A1BG	1	Rattus	16483693	agricultural	0	0	fertilizer
Valproic Acid	A1BG	1	Homo	25979313	pharmaceutical	0	0	treatment of epilepsy, bipolar disorder and migraine headaches
2,2',4,4'-tetrabromodiphenyl ether	A1BG	-	Rattus	20056577	industrial	0	0	flame retardent
Nanotubes, Carbon	A1BG	-	Mus	25620056	industrial	0	0	multiple industrial applications
Aflatoxin B1	A1BG	+	Rattus	25378103	pollutant	0	0	fungal toxin
Plant Preparations	A1BG	+	Rattus	26945725	pharmaceutical	0	0	Diverse pharmaceutical
Ozone	A1BG	+	Rattus	25838073	environment	0	0	atmosphere gas
Cyclosporine	A1BG	-	Homo	25562108	pharmaceutical	0	0	immune suppressant
Aflatoxin B1	A1BG	-	Homo	22100608	pollutant	0	0	fungal toxin
Valproic Acid	A1BG	-	Homo	29154799	pharmaceutical	0	0	treatment of epilepsy, bipolar disorder and migraine headaches
dicrotophos	A1BG	-	Homo	28302478	agricultural	0	0	insecticide
bisphenol A	A1BG	+	Homo	25047013	industrial	0	0	monomer of polycarbonate plastic
Copper Sulfate	A1BG	-	Homo	19549813	agricultural	0	0	fungicide and herbicide, niche uses
Phenylmercuric Acetate	A1BG	-	Homo	26272509	agricultural	industrial	0	antifungal activity in agriculture and in leather processing
Valproic Acid	A1BG	+	Homo	28001369	pharmaceutical	0	0	treatment of epilepsy, bipolar disorder and migraine headaches
propionaldehyde	A1BG	+	Homo	26079696	industrial	0	0	intermediate in chemical industry
entinostat	A1BG	+	Homo	27188386	pharmaceutical	0	0	histone deacetylase inhibitor
Tetrachlorodibenzodioxin	A1BG	1	Mus	28922406	pollutant	0	0	product of incomplete combustion of organic material
bisphenol A	A1BG	-	Rattus	25181051	industrial	0	0	monomer of polycarbonate plastic
jinfukang	A1BG	+	Homo	27392435	pharmaceutical	0	0	Chinese herbal medicine with potential immunopotentiation activity
jinfukang	A1BG-AS1	-	Homo	27392435	pharmaceutical	0	0	Chinese herbal medicine with potential immunopotentiation activity
(+)-JQ1 compound	A1BG-AS1	+	Homo	24796395	research	0	0	BET bromodomain inhibitor
Copper Sulfate	A1CF	-	Homo	19549813	agricultural	0	0	fungicide and herbicide, niche uses
Urethane	A1CF	-	Homo	28818685	food component	pharmaceutical	0	present in alcohol beverages, used as an antineoplastic agent
Tetrachlorodibenzodioxin	A1CF	-	Rattus	21724226	pollutant	0	0	product of incomplete combustion of organic material
Quercetin	A1CF	-	Homo	21632981	food component	0	0	food additive
butyraldehyde	A1CF	+	Homo	26079696	industrial	0	0	intermediate in chemical industry
Aflatoxin B1	A1CF	-	Homo	27153756	pollutant	0	0	fungal toxin
Cisplatin	A1CF	-	Homo	27392435	pharmaceutical	0	0	chemotherapy medication
Acetaminophen	A1CF	-	Homo	29067470	pharmaceutical	0	0	painkiller
Air Pollutants	A1CF	-	Homo	21757418	pollutant	0	0	air pollutants
Tetrachlorodibenzodioxin	A1CF	-	Rattus	21215274	pollutant	0	0	product of incomplete combustion of organic material
Acrylamide	A1CF	-	Rattus	28959563	industrial	research	0	intermideate for polyacrylamide and acrylamide copolymers used in production of paper, dyes, and plastics, and in water treatment. Forms during cooking in starchy foods
Cyclosporine	A1CF	-	Homo	25562108	pharmaceutical	0	0	immune suppressant
1,4-bis(2-(3,5-dichloropyridyloxy))benzene	A1CF	+	Mus	28903501	research	0	0	potent CAR ligand
nefazodone	A1CF	+	Rattus	24136188	pharmaceutical	0	0	antidepressant
Silicon Dioxide	A1CF	-	Homo	23806026	industrial	0	0	multiple industrial applications
Fenretinide	A1CF	+	Mus	28973697	pharmaceutical	0	0	treatment of cancer
Endosulfan	A1CF	-	Rattus	29391264	agricultural	0	0	organochlorine insecticide
perfluorooctanoic acid	A1CF	+	Rattus	28511854	industrial	0	0	surfactant
Cyclosporine	A1CF	-	Homo	20106945	pharmaceutical	0	0	immune suppressant
Valproic Acid	A1CF	-	Homo	29154799	pharmaceutical	0	0	treatment of epilepsy, bipolar disorder and migraine headaches
Valproic Acid	A1CF	1	Homo	25979313	pharmaceutical	0	0	treatment of epilepsy, bipolar disorder and migraine headaches
benz(a)anthracene	A1CF	-	Mus	26377693	pollutant	0	0	product of incomplete combustion of organic material
jinfukang	A1CF	-	Homo	27392435	pharmaceutical	0	0	Chinese herbal medicine with potential immunopotentiation activity
Cadmium Chloride	A1CF	+	Mus	24982889	industrial	0	0	multiple industrial applications
GW 4064	A1CF	+	Mus	26655953	research	0	0	GW4064 is a FXR agonist. GW4064 is a non-steroidal agonist of the orphan nuclear receptor FXR
bisphenol A	A1CF	-	Rattus	25181051	industrial	0	0	monomer of polycarbonate plastic
Aflatoxin B1	A1CF	1	Homo	20106945	pollutant	0	0	fungal toxin
periodate-oxidized adenosine	A1CF	1	Homo	17097637	research	0	0	Adenosine-2′,3′-dialdehyde (Adox) is an inhibitor of S-adenosylhomocysteine hydrolase (AdoHcy hydrolase ) and it may be used in studies on the role of AdoHcy hydrolase in adenosine induce apoptosis and related S-adenosylhomocysteine-regulated processes. Adox is a methylation inhibitor that inhibits histone methytransferases (HMTase) and arginine methylation.
Dietary Fats	A1CF	-	Mus	25016146	food component	0	0	food
Silicon Dioxide	A1CF	-	Homo	25895662	industrial	0	0	multiple industrial applications
bisphenol A	A26C2	-	Rattus	25181051	industrial	0	0	monomer of polycarbonate plastic
potassium persulfate	A2M	+	Homo	20815409	industrial	0	0	used in organic synthesis, for hair bleaching and as an improving agent for flour
Cadmium Chloride	A2M	+	Rattus	25993096	industrial	0	0	multiple industrial applications
Valproic Acid	A2M	-	Homo	29154799	pharmaceutical	0	0	treatment of epilepsy, bipolar disorder and migraine headaches
naphthalene	A2M	+	Rattus	24976557	industrial	pollutant	0	Component of coal tar, produced during burning of organic material, precursor in chemical synthesis, component of mothballs
Sirolimus	A2M	+	Rattus	21865292	pharmaceutical	research	0	prevention of organ transplant rejection and for the treatment of lymphangioleiomyomatosis
Flutamide	A2M	-	Rattus	24136188	pharmaceutical	0	0	nonsteroidal antiandrogen to treat prostate cancer
Vitallium	A2M	+	Homo	23825117	pharmaceutical	0	0	alloy of 65% cobalt, 30% chromium, 5% molybdenum, and other substances used in dentistry and artificial joints
Pilocarpine	A2M	+	Rattus	17971868	pharmaceutical	0	0	used to treat increased pressure inside the eye and dry mouth
actein	A2M	+	Rattus	19527300	research	0	0	triterpene glycoside isolated from the rhizomes of Cimicifuga foetida
Aflatoxin B1	A2M	-	Mus	19770486	pollutant	0	0	fungal toxin
Propylthiouracil	A2M	+	Rattus	24780913	pharmaceutical	0	0	antithyroid
bisphenol A	A2M	1	Rattus	25181051	industrial	0	0	monomer of polycarbonate plastic
Tetrachlorodibenzodioxin	A2M	-	Mus	19770486	pollutant	0	0	product of incomplete combustion of organic material
tauroursodeoxycholic acid	A2M	-	Rattus	15885361	pharmaceutical	endobiotic	0	naturally occuring compound in animal bile secretion, used in traditional medecine
Copper	A2M	+	Rattus	22465980	industrial	0	0	multiple applications
Dexamethasone	A2M	+	Homo	25047013	pharmaceutical	0	0	It is used in the treatment of many conditions, including rheumatic problems, a number of skin diseases, severe allergies, asthma, chronic obstructive lung disease, croup, brain swelling, and along with antibiotics in tuberculosis.
Thioacetamide	A2M	+	Rattus	23411599	research	0	0	source of sulfide ions
Cuprizone	A2M	+	Rattus	27523638	research	0	0	demyelination agent
Cyclosporine	A2M	-	Mus	19770486	pharmaceutical	0	0	immune suppressant
perfluorooctane sulfonic acid	A2M	1	Mus	19429403	industrial	pollutant	0	multiple uses as fluorosurfactant
darinaparsin	A2M	+	Homo	22535156	pharmaceutical	0	0	anticancer properties
ochratoxin A	A2M	+	Rattus	12700408	pollutant	0	0	produced by bacteria in food
Copper Sulfate	A2M	-	Homo	19549813	agricultural	0	0	fungicide and herbicide, niche uses
Benzo(a)pyrene	A2M	+	Homo	22316170	pollutant	0	0	product of incomplete combustion of organic material
Tacrolimus	A2M	+	Rattus	21865292	pharmaceutical	0	0	is an immunosuppressive drug used mainly after allogeneic organ transplant to lower the risk of organ rejection
polyhexamethyleneguanidine	A2M	+	Rattus	27989595	industrial	0	0	is a guanidine derivative that is used as a biocidal disinfectant
1-Naphthylisothiocyanate	A2M	+	Rattus	25380136	research	0	0	a tool to study the pathogenesis of chemically induced cholestasis,
Simvastatin	A2M	-	Rattus	16414398	pharmaceutical	0	0	used to decrease elevated lipid
Aflatoxin B1	A2M	-	Homo	27153756	pollutant	0	0	fungal toxin
Valproic Acid	A2M	+	Homo	28001369	pharmaceutical	0	0	treatment of epilepsy, bipolar disorder and migraine headaches
Phenobarbital	A2M	-	Rattus	19162173	pharmaceutical	0	0	treatment of epilepsy
Silicon Dioxide	A2M	+	Homo	23806026	industrial	0	0	multiple industrial applications
Grape Seed Proanthocyanidins	A2M	+	Homo	20471814	food component	0	0	In nature, proanthocyanidins serve among other chemical and induced defense mechanisms against plant pathogens and predators
perfluorooctanoic acid	A2M	1	Mus	19429403	industrial	0	0	surfactant
indole-3-carbinol	A2M	1	Rattus	21396975	food component	0	0	anticarcinogenic properties
Freund's Adjuvant	A2M	+	Rattus	21149847	pharmaceutical	0	0	a solution of antigen emulsified in mineral oil and used as an immunopotentiator
irinotecan	A2M	+	Rattus	20097248	pharmaceutical	0	0	Irinotecan, sold under the brand name Camptosar among others, is a medication used to treat colon cancer, and small cell lung cancer
Glafenine	A2M	+	Rattus	24136188	pharmaceutical	0	0	nonsteroidal anti-inflammatory drug
2,2,5,7,8-pentamethyl-1-hydroxychroman	A2M	-	Rattus	21920950	pharmaceutical	0	0	proposed as an anticancer agent
perfluorodecanoic acid	A2M	+	Mus	23567314	industrial	pollutant	0	surfactant
carbonyl sulfide	A2M	+	Rattus	19395590	industrial	0	0	intermediate in the production of thiocarbamate herbicides
Orphenadrine	A2M	1	Rattus	23665939	pharmaceutical	0	0	Orphenadrine is used to relieve pain caused by muscle injuries like strains and sprains in combination with rest and physical therapy
Flutamide	A2M	+	Rattus	24793618	pharmaceutical	0	0	nonsteroidal antiandrogen to treat prostate cancer
Isotretinoin	A2M	+	Homo	20436886	pharmaceutical	0	0	used to treat Acne and skin diseases
2-amino-1-methyl-6-phenylimidazo(4,5-b)pyridine	A2M	+	Rattus	15059925	food component	0	0	present in cooked meat
Cyclosporine	A2M	+	Rattus	21865292	pharmaceutical	0	0	immune suppressant
Valproic Acid	A2M	1	Homo	25979313	pharmaceutical	0	0	treatment of epilepsy, bipolar disorder and migraine headaches
2,6-dinitrotoluene	A2M	1	Rattus	21346803	industrial	0	0	intermediate in production of polyuretane foams, plasticiser
Vitamin K 3	A2M	1	Homo	20044591	pharmaceutical	0	0	binding of calcium in bones and other tissues
Phenylmercuric Acetate	A2M	+	Homo	26272509	agricultural	industrial	0	antifungal activity in agriculture and in leather processing
Silicon Dioxide	A2M	+	Mus	23221170	industrial	0	0	multiple industrial applications
Isoproterenol	A2M	+	Mus	21335049	pharmaceutical	0	0	used for heart disease
alpha-Chlorohydrin	A2M	-	Rattus	28522335	food component	0	0	created in foods during protein hydrolysis
Endosulfan	A2M	-	Rattus	29391264	agricultural	0	0	organochlorine insecticide
tris(2-butoxyethyl) phosphate	A2M	1	Homo	29024780	industrial	pollutant	0	flame retardent
Ammonium Chloride	A2M	1	Rattus	16483693	agricultural	0	0	fertilizer
Soman	A2M	+	Rattus	19281266	chemical warfare	0	0	chemical warfare
gold (III) porphyrin 1a	A2M	-	Rattus	16206274	pharmaceutical	0	0	candidate for anticancer drug
trichostatin A	A2M	+	Homo	24935251	pharmaceutical	research	0	inhibits the class I and II mammalian histone deacetylase (HDAC)
Cyclosporine	A2M	-	Homo	25562108	pharmaceutical	0	0	immune suppressant
perfluoro-n-undecanoic acid	A2M	-	Mus	23567314	industrial	pollutant	0	surfactant
vinclozolin	A2M	+	Rattus	22570695	agricultural	0	0	fungicide
Lipopolysaccharides	A2M	+	Mus	27339419	pollutant	0	0	component of Gram-negative bacteria
Diethylnitrosamine	A2M	-	Rattus	20360939	drug of abuse	0	0	tobacco smoke
Pyrogallol	A2M	+	Mus	20362636	industrial	cosmetics	0	used in photography and hair dyeing
2,4-dinitrotoluene	A2M	1	Rattus	21346803	industrial	0	0	precursor to toluene diisocyanate
3,4,5,3',4'-pentachlorobiphenyl	A2M	-	Rattus	19692669	industrial	0	0	flame retardant
gemcitabine	A2M	+	Homo	20531411	pharmaceutical	0	0	chemotherapy for various cancer
obeticholic acid	A2M	-	Homo	27939613	pharmaceutical	0	0	It is used as a drug to treat primary biliary cholangitis
Phenobarbital	A2M	1	Homo	19159669	pharmaceutical	0	0	treatment of epilepsy
Cyclosporine	A2M	-	Homo	27989131	pharmaceutical	0	0	immune suppressant
furan	A2M	+	Rattus	26194646	pollutant	0	0	thermal degradation of natural food constituents
Ouabain	A2M	1	Homo	17268060	pharmaceutical	chemical warfare	0	compound of plant origin, used as arrow poison, and treatment of heart failure
Dichloroacetic Acid	A2M	-	Mus	28962523	pharmaceutical	cosmetics	0	used for cosmetic treatments (such as chemical peels and tattoo removal) and as topical medication for the chemoablation of warts, including genital warts
1,2-dithiol-3-thione	A2M	+	Rattus	19162173	food component	0	0	found in brassicas, Nrf2 inducer
Aflatoxin B1	A2M	+	Rattus	25378103	pollutant	0	0	fungal toxin
lead acetate	A2M	-	Rattus	22641619	industrial	food component	0	used in cosmetics, in vine adulteration
Progesterone	A2M	-	Mus	22238285	pharmaceutical	cosmetics	endobiotic	hormone
1,4-bis(2-(3,5-dichloropyridyloxy))benzene	A2M	+	Mus	27413110	research	0	0	potent CAR ligand
Mercuric Chloride	A2M	+	Homo	27188386	industrial	0	0	catalist in organic synthesis
2',3,3',4',5-pentachloro-4-hydroxybiphenyl	A2M	-	Rattus	19114083	industrial	pollutant	0	metabolit of PCB126
propionaldehyde	A2M	+	Homo	26079696	industrial	0	0	intermediate in chemical industry
Tetrachlorodibenzodioxin	A2M	-	Rattus	21215274	pollutant	0	0	product of incomplete combustion of organic material
Cyclosporine	A2M	-	Homo	20106945	pharmaceutical	0	0	immune suppressant
sodium bichromate	A2M	+	Rattus	25993096	industrial	0	0	precursor for tunning solts of Cr
Dasatinib	A2M	+	Homo	20579391	pharmaceutical	0	0	chemotherapy medication (leukemia)
Dimethylnitrosamine	A2M	+	Rattus	25380136	pollutant	0	0	by-product of several industrial processes and present at very low levels in certain foodstuffs, especially those cooked, smoked, or cured
incobotulinumtoxinA	A2M	-	Homo	29522793	pharmaceutical	pollutant	0	botulinum toxin used to treat chronic sialorrhea, cervical dystonia, muscle stiffness an other.
Diclofenac	A2M	+	Mus	26934552	pharmaceutical	0	0	nonsteroidal anti-inflammatory drug
Dextroamphetamine	A2M	+	Rattus	16715494	drug of abuse	0	0	used as performance enhancer by athletes and recreational drug
sodium bichromate	A2M	1	Rattus	22110744	industrial	0	0	precursor for tunning solts of Cr
methylmercuric chloride	A2M-AS1	-	Homo	28001369	pollutant	0	0	naturally occuring or results from mining and other activities
Valproic Acid	A2M-AS1	-	Homo	24383497	pharmaceutical	0	0	treatment of epilepsy, bipolar disorder and migraine headaches
Aflatoxin B1	A2M-AS1	-	Homo	27153756	pollutant	0	0	fungal toxin
Valproic Acid	A2M-AS1	-	Homo	26272509	pharmaceutical	0	0	treatment of epilepsy, bipolar disorder and migraine headaches
jinfukang	A2M-AS1	+	Homo	27392435	pharmaceutical	0	0	Chinese herbal medicine with potential immunopotentiation activity
Valproic Acid	A2M-AS1	1	Homo	25979313	pharmaceutical	0	0	treatment of epilepsy, bipolar disorder and migraine headaches
Endosulfan	A2ML1	-	Rattus	29391264	agricultural	0	0	organochlorine insecticide
Cocaine	A2ML1	-	Rattus	27899881	drug of abuse	0	0	recreational drug
Cadmium Chloride	A2ML1	+	Rattus	25993096	industrial	0	0	multiple industrial applications
Propylthiouracil	A2ML1	+	Rattus	24780913	pharmaceutical	0	0	antithyroid
decabromobiphenyl ether	A2ML1	+	Rattus	23914054	industrial	0	0	flame retardent
titanium dioxide	A2ML1	+	Mus	27760801	food component	cosmetics	industrial	pigments, sunscreen and other
sodium bichromate	A2ML1	1	Rattus	22110744	industrial	0	0	precursor for tunning solts of Cr
Oxygen	A2ML1	+	Homo	24236059	environment	0	0	air component
indole-3-carbinol	A2ML1	1	Rattus	21396975	food component	0	0	anticarcinogenic properties
Diclofenac	A2ML1	+	Mus	26934552	pharmaceutical	0	0	nonsteroidal anti-inflammatory drug
sodium bichromate	A2ML1	-	Rattus	25993096	industrial	0	0	precursor for tunning solts of Cr
Nickel	A2ML1	-	Homo	24768652	industrial	0	0	multiple industrial applications
Estradiol	A2MP1	+	Homo	18692832	pharmaceutical	endobiotic	0	female reproductive hoormone
Nanotubes, Carbon	A330044H09	-	Mus	25554681	industrial	0	0	multiple industrial applications
Soman	A3GALT2	+	Rattus	19281266	chemical warfare	0	0	chemical warfare
tesaglitazar	A3GALT2	-	Rattus	21515302	pharmaceutical	0	0	dual peroxisome proliferator-activated receptor agonist with affinity to PPARα and PPARγ, proposed for the management of type 2 diabetes
muraglitazar	A3GALT2	-	Rattus	21515302	pharmaceutical	0	0	dual peroxisome proliferator-activated receptor agonist with affinity to PPARα and PPARγ
nickel monoxide	A3GALT2	+	Rattus	19167457	industrial	0	0	used in batteries
troglitazone	A3GALT2	-	Rattus	21515302	pharmaceutical	0	0	antidiabetic and anti-inflammatory drug
Endosulfan	A3GALT2	-	Rattus	29391264	agricultural	0	0	organochlorine insecticide
Plant Extracts	A3GALT2	-	Homo	23557933	pharmaceutical	0	0	various pharmaceutical
furan	A3GALT2	+	Rattus	27387713	pollutant	0	0	thermal degradation of natural food constituents
bisphenol A	A3GALT2	-	Rattus	25181051	industrial	0	0	monomer of polycarbonate plastic
Topotecan	A3GALT2	+	Rattus	25729387	pharmaceutical	0	0	chemotherapeutic agent that is a topoisomerase inhibitor
Tetrachlorodibenzodioxin	A3GALT2	1	Mus	21570461	pollutant	0	0	product of incomplete combustion of organic material
Acetaminophen	A3GALT2	-	Homo	22230336	pharmaceutical	0	0	painkiller
Diuron	A3GALT2	-	Rattus	21551480	agricultural	0	0	algicide and herbicide, inhibitor of photosynthesis
cobaltous chloride	A3GALT2	-	Rattus	24386269	industrial	0	0	moisture detector
Trichloroethylene	A430017K17	-	Mus	25549359	industrial	0	0	solvent
bisphenol A	A4GALT	-	Rattus	25181051	industrial	0	0	monomer of polycarbonate plastic
2-monochloropropanediol	A4GALT	+	Rattus	28522335	food component	0	0	occurs naturaly as byproduct of fermentation
Dietary Sucrose	A4GALT	+	Rattus	26033743	food component	0	0	food
Ammonium Chloride	A4GALT	1	Rattus	16483693	agricultural	0	0	fertilizer
ICG 001	A4GALT	+	Homo	26191083	research	0	0	target Wnt-b signalling
decitabine	A4GALT	1	Homo	23300844	pharmaceutical	0	0	treat blood related disorders
Copper	A4GALT	+	Rattus	26033743	industrial	0	0	multiple applications
Formaldehyde	A4GALT	-	Homo	27664576	industrial	research	cosmetics	multiple applications
Urethane	A4GALT	+	Homo	28818685	food component	pharmaceutical	0	present in alcohol beverages, used as an antineoplastic agent
1-Methyl-4-phenylpyridinium	A4GALT	+	Homo	24810058	agricultural	0	0	herbicide, research
Benzo(a)pyrene	A4GALT	+	Homo	20064835	pollutant	0	0	product of incomplete combustion of organic material
Tetrachlorodibenzodioxin	A4GALT	+	Homo	20106945	pollutant	0	0	product of incomplete combustion of organic material
Plant Extracts	A4GALT	-	Homo	23557933	pharmaceutical	0	0	various pharmaceutical
1,3-butadiene	A4GALT	+	Mus	29038090	industrial	0	0	monomer in the production of synthetic rubber
Tetrachlorodibenzodioxin	A4GALT	+	Homo	21632981	pollutant	0	0	product of incomplete combustion of organic material
Cisplatin	A4GALT	1	Homo	23300844	pharmaceutical	0	0	chemotherapy medication
zoledronic acid	A4GALT	+	Homo	24714768	pharmaceutical	0	0	bone deseases treatment
Dietary Fats	A4GALT	-	Mus	25016146	food component	0	0	food
Benzo(a)pyrene	A4GALT	+	Homo	19152381	pollutant	0	0	product of incomplete combustion of organic material
furan	A4GALT	+	Rattus	27387713	pollutant	0	0	thermal degradation of natural food constituents
jinfukang	A4GALT	+	Homo	27392435	pharmaceutical	0	0	Chinese herbal medicine with potential immunopotentiation activity
Smoke	A4GALT	-	Homo	21095227	pollutant	0	0	result of combustion of organic material
Tetrachlorodibenzodioxin	A4GNT	1	Mus	26377647	pollutant	0	0	product of incomplete combustion of organic material
Acetaminophen	A4GNT	-	Homo	26690555	pharmaceutical	0	0	painkiller
Soot	A4GNT	+	Mus	26551751	pollutant	0	0	air pollutant
Fenretinide	A4GNT	-	Mus	28973697	pharmaceutical	0	0	treatment of cancer
Silver	A4GNT	+	Mus	27131904	industrial	0	0	many applications
Antirheumatic Agents	A4GNT	-	Homo	24449571	pharmaceutical	0	0	antirheumatic agents
Dietary Fats	A4GNT	+	Mus	25016146	food component	0	0	food
Soot	A530028O18	-	Mus	26551751	pollutant	0	0	air pollutant
zoledronic acid	AAA1	-	Homo	24714768	pharmaceutical	0	0	bone deseases treatment
Cadmium	AAA1	-	Homo	24376830	industrial	0	0	multiple applications, contaminates food and water
Trinitrotoluene	AAAS	1	Rattus	21346803	industrial	0	0	used in explosives
2-Acetylaminofluorene	AAAS	+	Mus	21607683	research	0	0	used as a biochemical tool in the study of carcinogenesis
Phenobarbital	AAAS	1	Mus	23091169	pharmaceutical	0	0	treatment of epilepsy
Piperonyl Butoxide	AAAS	+	Rattus	22484513	agricultural	0	0	despite having no pesticidal activity of its own, it enhances the potency of certain pesticides such as carbamates, pyrethrins, pyrethroids, and rotenone. It is a semisynthetic derivative of safrole
2,6-dinitrotoluene	AAAS	1	Rattus	21346803	industrial	0	0	intermediate in production of polyuretane foams, plasticiser
Fenretinide	AAAS	+	Mus	28973697	pharmaceutical	0	0	treatment of cancer
Aflatoxin B1	AAAS	+	Mus	19770486	pollutant	0	0	fungal toxin
Valproic Acid	AAAS	+	Mus	21427059	pharmaceutical	0	0	treatment of epilepsy, bipolar disorder and migraine headaches
hexabromocyclododecane	AAAS	1	Mus	24680724	industrial	0	0	flame retardant
Diethylnitrosamine	AAAS	+	Mus	21607683	drug of abuse	0	0	tobacco smoke
Coumestrol	AAAS	+	Homo	19167446	food component	0	0	natural organic present in vegetables, estrogenic activity
4-amino-2,6-dinitrotoluene	AAAS	1	Rattus	21346803	industrial	0	0	precusrsor to TNT
Dibutyl Phthalate	AAAS	-	Mus	17361019	industrial	0	0	plasticizer
pirinixic acid	AAAS	+	Mus	23811191	research	0	0	peroxisome proliferator-activated receptor alpha (PPARa) agonist
Acrylamide	AAAS	+	Rattus	28959563	industrial	research	0	intermideate for polyacrylamide and acrylamide copolymers used in production of paper, dyes, and plastics, and in water treatment. Forms during cooking in starchy foods
Dietary Fats	AAAS	+	Mus	25016146	food component	0	0	food
Tetrachlorodibenzodioxin	AAAS	1	Mus	24680724	pollutant	0	0	product of incomplete combustion of organic material
Benzo(a)pyrene	AAAS	+	Mus	21715664	pollutant	0	0	product of incomplete combustion of organic material
Phenytoin	AAAS	-	Rattus	20345932	pharmaceutical	0	0	is an anti-seizure medication
Benzo(a)pyrene	AAAS	+	Mus	19770486	pollutant	0	0	product of incomplete combustion of organic material
Nanotubes, Carbon	AAAS	+	Mus	25554681	industrial	0	0	multiple industrial applications
cobaltous chloride	AAAS	-	Homo	19320972	industrial	0	0	moisture detector
bisphenol A	AAAS	+	Rattus	25181051	industrial	0	0	monomer of polycarbonate plastic
S-2-pentyl-4-pentynoic hydroxamic acid	AAAS	+	Mus	21427059	pharmaceutical	0	0	derivative of valproic acid - treatment of epilepsy, bipolar disorder and migraine headaches
14-deoxy-11,12-didehydroandrographolide	AAAS	-	Homo	22101062	pharmaceutical	0	0	A natural product found in Andrographis paniculata, herbal medicine commonly used to treat colds, infections, and liver diseases
Nanotubes, Carbon	AAAS	+	Mus	25554681	industrial	0	0	multiple industrial applications
trimellitic anhydride	AAAS	+	Mus	19042947	industrial	0	0	plasticizer
fullerene C60	AAAS	+	Rattus	19167457	cosmetics	research	pharmaceutical	carbon nano-balls
nickel monoxide	AAAS	+	Rattus	19167457	industrial	0	0	used in batteries
Tetrachlorodibenzodioxin	AAAS	1	Mus	21570461	pollutant	0	0	product of incomplete combustion of organic material
Dietary Fats	AACS	1	Mus	19680557	food component	0	0	food
Dibutyl Phthalate	AACS	-	Rattus	21266533	industrial	0	0	plasticizer
GSK-J4	AACS	-	Homo	29301935	research	0	0	jumonji H3K27 demethylase inhibitor
1,4-bis(2-(3,5-dichloropyridyloxy))benzene	AACS	-	Mus	21354444	research	0	0	potent CAR ligand
Antirheumatic Agents	AACS	-	Homo	24449571	pharmaceutical	0	0	antirheumatic agents
flusilazole	AACS	+	Rattus	28263823	agricultural	0	0	organosilicon fungicide
C646 compound	AACS	+	Homo	26191083	research	0	0	C646 was used to study the role of p300 in chronic neuropathic pain in rats with chronic constriction injury
Diclofenac	AACS	-	Mus	26934552	pharmaceutical	0	0	nonsteroidal anti-inflammatory drug
Sodium Fluoride	AACS	-	Mus	28918527	food component	industrial	agricultural	added to drinking water to maintain dental health, used as cleaning agent, in chemical synthesis and metallurgy and as insecticide
bisphenol A	AACS	+	Mus	25270620	industrial	0	0	monomer of polycarbonate plastic
Valproic Acid	AACS	+	Mus	21427059	pharmaceutical	0	0	treatment of epilepsy, bipolar disorder and migraine headaches
Tetrachlorodibenzodioxin	AACS	1	Mus	26377647	pollutant	0	0	product of incomplete combustion of organic material
Propylthiouracil	AACS	-	Rattus	24780913	pharmaceutical	0	0	antithyroid
Cisplatin	AACS	+	Homo	27594783	pharmaceutical	0	0	chemotherapy medication
tallow	AACS	1	Mus	19680557	food component	industrial	0	Tallow is a rendered form of beef or mutton fat, and is primarily made up of triglycerides. Used for food and production of candles and soap
Carbamazepine	AACS	1	Homo	25979313	pharmaceutical	0	0	reatment of epilepsy and neuropathic pain
bisphenol A	AACS	+	Mus	21932408	industrial	0	0	monomer of polycarbonate plastic
furan	AACS	+	Rattus	27387713	pollutant	0	0	thermal degradation of natural food constituents
Pregnenolone Carbonitrile	AACS	-	Mus	28903501	research	0	0	Pregnenolone carbonitrile is a catatoxic steroid and microsomal enzyme inducer having significant effects on the induction of cytochrome P450. It has also demonstrated the potential for protective capability against acetaminophen-induced liver damage.
Ammonium Chloride	AACS	1	Rattus	16483693	agricultural	0	0	fertilizer
Endosulfan	AACS	1	Rattus	29391264	agricultural	0	0	organochlorine insecticide
S-2-pentyl-4-pentynoic hydroxamic acid	AACS	+	Mus	21427059	pharmaceutical	0	0	derivative of valproic acid - treatment of epilepsy, bipolar disorder and migraine headaches
Cyclosporine	AACS	+	Homo	20106945	pharmaceutical	0	0	immune suppressant
3,5,5-trimethylhexanoylferrocene	AACS	+	Mus	22649188	research	0	0	3,5,5-Trimethylhexanoyl (TMH)-ferrocene has been used to produce iron loading in whole animals and in cultured hepatocytes.
adrenocorticotropin zinc	AACS	-	Mus	19920212	pharmaceutical	0	0	corticoid
Phenobarbital	AACS	+	Mus	23091169	pharmaceutical	0	0	treatment of epilepsy
2,6-dinitrotoluene	AACS	1	Rattus	21346803	industrial	0	0	intermediate in production of polyuretane foams, plasticiser
Acetaminophen	AACS	+	Homo	29067470	pharmaceutical	0	0	painkiller
4,4'-diaminodiphenylmethane	AACS	+	Mus	18648102	industrial	0	0	precursor to polyurethanes
Cocaine	AACS	1	Rattus	20187946	drug of abuse	0	0	recreational drug
Benzo(a)pyrene	AACS	-	Mus	19770486	pollutant	0	0	product of incomplete combustion of organic material
Valproic Acid	AACS	-	Homo	29154799	pharmaceutical	0	0	treatment of epilepsy, bipolar disorder and migraine headaches
Benzo(a)pyrene	AACS	-	Mus	21715664	pollutant	0	0	product of incomplete combustion of organic material
chromium hexavalent ion	AACS	1	Mus	28472532	industrial	pollutant	0	used in dyes, produced as side-product of Cr(III) containing products
Valproic Acid	AACS	1	Mus	17292431	pharmaceutical	0	0	treatment of epilepsy, bipolar disorder and migraine headaches
titanium dioxide	AACS	-	Mus	23557971	food component	cosmetics	industrial	pigments, sunscreen and other
Tetrachlorodibenzodioxin	AACS	-	Rattus	21215274	pollutant	0	0	product of incomplete combustion of organic material
Palm Oil	AACS	1	Mus	19680557	food component	cosmetics	0	Palm oil is an edible vegetable oil derived from the mesocarp (reddish pulp) of the fruit of the oil palms, primarily the African oil palm Elaeis guineensis
3,4,5,3',4'-pentachlorobiphenyl	AACS	+	Rattus	23196670	industrial	0	0	flame retardant
Nanotubes, Carbon	AACS	-	Mus	25620056	industrial	0	0	multiple industrial applications
Tamoxifen	AACS	1	Mus	20937368	pharmaceutical	0	0	prevent breast cancer
Dietary Sucrose	AACS	+	Rattus	26033743	food component	0	0	food
Phthalic Acids	AACS	+	Rattus	21061450	industrial	research	0	isomer of isophthalic acid and terephthalic acid
Nanotubes, Carbon	AACS	-	Mus	25620056	industrial	0	0	multiple industrial applications
fluoranthene	AACS	-	Mus	28329830	pollutant	0	0	It is a member of the class of PAHs known as non-alternant PAHs because it has rings other than those with six carbon atoms. Component of coal tar
bisphenol A	AACS	+	Rattus	24988533	industrial	0	0	monomer of polycarbonate plastic
beta-hydroxy simvastatin acid	AACS	1	Homo	18192240	pharmaceutical	0	0	simvastatin hydroxy acid is a metabolite of simvastatin. Simvastatin is a hypolipidemic drug used to control elevated cholesterol, or hypercholesterolemia.
Valproic Acid	AACS	1	Homo	25979313	pharmaceutical	0	0	treatment of epilepsy, bipolar disorder and migraine headaches
Dibutyl Phthalate	AACS	+	Mus	21266533	industrial	0	0	plasticizer
pirinixic acid	AACS	-	Mus	18445702	research	0	0	peroxisome proliferator-activated receptor alpha (PPARa) agonist
Glucosamine	AACS	+	Mus	17178593	food component	0	0	Dietary supplement beneficial for osteoartitis
2',3,3',4',5-pentachloro-4-hydroxybiphenyl	AACS	-	Rattus	19114083	industrial	pollutant	0	metabolit of PCB126
Benzo(a)pyrene	AACS	-	Mus	22228805	pollutant	0	0	product of incomplete combustion of organic material
Estradiol	AACS	-	Mus	19484750	pharmaceutical	endobiotic	0	female reproductive hoormone
Dietary Fats	AACS	+	Mus	25016146	food component	0	0	food
Isotretinoin	AACS	-	Homo	20436886	pharmaceutical	0	0	used to treat Acne and skin diseases
2,4-dinitrotoluene	AACS	1	Rattus	21346803	industrial	0	0	precursor to toluene diisocyanate
methyl cellosolve	AACS	+	Rattus	21061450	industrial	0	0	used mainly as solvent
Urethane	AACS	+	Homo	28818685	food component	pharmaceutical	0	present in alcohol beverages, used as an antineoplastic agent
Tetrachlorodibenzodioxin	AACS	1	Mus	28922406	pollutant	0	0	product of incomplete combustion of organic material
bisphenol A	AACS	+	Rattus	25181051	industrial	0	0	monomer of polycarbonate plastic
pirinixic acid	AACS	-	Mus	23811191	research	0	0	peroxisome proliferator-activated receptor alpha (PPARa) agonist
Copper	AACS	-	Mus	17205981	industrial	0	0	multiple applications
resveratrol	AACS	+	Mus	25505154	food component	0	0	food additive, antioxidant, found in grapes
Dibutyl Phthalate	AACS	+	Mus	17361019	industrial	0	0	plasticizer
Nickel	AACS	-	Homo	25583101	industrial	0	0	multiple industrial applications
Nickel	AACSP1	-	Homo	25583101	industrial	0	0	multiple industrial applications
butyraldehyde	AACSP1	-	Homo	26079696	industrial	0	0	intermediate in chemical industry
Valproic Acid	AACSP1	1	Homo	25979313	pharmaceutical	0	0	treatment of epilepsy, bipolar disorder and migraine headaches
propionaldehyde	AACSP1	+	Homo	26079696	industrial	0	0	intermediate in chemical industry
Nickel	AACSP1	-	Homo	24768652	industrial	0	0	multiple industrial applications
Tetrachlorodibenzodioxin	AADAC	-	Mus	28238261	pollutant	0	0	product of incomplete combustion of organic material
Tetrachlorodibenzodioxin	AADAC	+	Homo	20106945	pollutant	0	0	product of incomplete combustion of organic material
Tetracycline	AADAC	-	Mus	24489787	pharmaceutical	0	0	broad spectrum antibiotic
sodium arsenite	AADAC	-	Homo	25879800	agricultural	industrial	0	primarily used as a pesticide, but has other uses such as hide preservative, antiseptic, dyeing, and soaps
Fenofibrate	AADAC	+	Homo	25572481	pharmaceutical	0	0	It is mainly used to reduce cholesterol levels in people at risk of cardiovascular disease
bisphenol A	AADAC	-	Rattus	25181051	industrial	0	0	monomer of polycarbonate plastic
Cyclosporine	AADAC	-	Homo	20106945	pharmaceutical	0	0	immune suppressant
alpha-Chlorohydrin	AADAC	+	Rattus	28522335	food component	0	0	created in foods during protein hydrolysis
valdecoxib	AADAC	-	Rattus	24136188	pharmaceutical	0	0	nonsteroidal anti-inflammatory drug
Methotrexate	AADAC	+	Homo	24657277	pharmaceutical	0	0	treat cancer
Estradiol	AADAC	-	Homo	20106945	pharmaceutical	endobiotic	0	female reproductive hoormone
Vancomycin	AADAC	+	Mus	18930951	pharmaceutical	0	0	antibiotic
4,4'-diaminodiphenylmethane	AADAC	-	Rattus	25380136	industrial	0	0	precursor to polyurethanes
1-Naphthylisothiocyanate	AADAC	-	Rattus	25380136	research	0	0	a tool to study the pathogenesis of chemically induced cholestasis,
rosiglitazone	AADAC	+	Homo	25572481	pharmaceutical	0	0	It works as an insulin sensitizer, by binding to the PPAR in fat cells and making the cells more responsive to insulin
1,3-butadiene	AADAC	-	Mus	29038090	industrial	0	0	monomer in the production of synthetic rubber
Dimethylnitrosamine	AADAC	-	Rattus	25380136	pollutant	0	0	by-product of several industrial processes and present at very low levels in certain foodstuffs, especially those cooked, smoked, or cured
Tetrachlorodibenzodioxin	AADAC	-	Rattus	21724226	pollutant	0	0	product of incomplete combustion of organic material
2-monochloropropanediol	AADAC	+	Rattus	28522335	food component	0	0	occurs naturaly as byproduct of fermentation
Aflatoxin B1	AADAC	+	Homo	27153756	pollutant	0	0	fungal toxin
Piperonyl Butoxide	AADAC	-	Rattus	22484513	agricultural	0	0	despite having no pesticidal activity of its own, it enhances the potency of certain pesticides such as carbamates, pyrethrins, pyrethroids, and rotenone. It is a semisynthetic derivative of safrole
Valproic Acid	AADAC	-	Homo	29154799	pharmaceutical	0	0	treatment of epilepsy, bipolar disorder and migraine headaches
sodium bichromate	AADAC	-	Rattus	25993096	industrial	0	0	precursor for tunning solts of Cr
dicrotophos	AADAC	-	Homo	28302478	agricultural	0	0	insecticide
Tetrachlorodibenzodioxin	AADAC	+	Homo	11489354	pollutant	0	0	product of incomplete combustion of organic material
nefazodone	AADAC	-	Rattus	24136188	pharmaceutical	0	0	antidepressant
Urethane	AADAC	-	Homo	28818685	food component	pharmaceutical	0	present in alcohol beverages, used as an antineoplastic agent
Potassium Dichromate	AADAC	+	Mus	23608068	industrial	0	0	used as cleaning agent, as cenment component and in photography
Silicon Dioxide	AADAC	+	Homo	23806026	industrial	0	0	multiple industrial applications
Cephaloridine	AADAC	+	Rattus	18500788	pharmaceutical	0	0	Antibiotic
Tetrachlorodibenzodioxin	AADAC	1	Mus	26377647	pollutant	0	0	product of incomplete combustion of organic material
Fenretinide	AADAC	+	Mus	28973697	pharmaceutical	0	0	treatment of cancer
Tetrachlorodibenzodioxin	AADAC	-	Mus	18796159	pollutant	0	0	product of incomplete combustion of organic material
Acetaminophen	AADAC	-	Homo	29067470	pharmaceutical	0	0	painkiller
Carbon Tetrachloride	AADAC	-	Mus	27339419	industrial	0	0	cleaning and other
Thioacetamide	AADAC	-	Rattus	23411599	research	0	0	source of sulfide ions
Ammonium Chloride	AADAC	1	Rattus	16483693	agricultural	0	0	fertilizer
Pregnenolone Carbonitrile	AADAC	-	Mus	28903501	research	0	0	Pregnenolone carbonitrile is a catatoxic steroid and microsomal enzyme inducer having significant effects on the induction of cytochrome P450. It has also demonstrated the potential for protective capability against acetaminophen-induced liver damage.
Glafenine	AADAC	-	Rattus	24136188	pharmaceutical	0	0	nonsteroidal anti-inflammatory drug
Copper	AADAC	-	Rattus	19821111	industrial	0	0	multiple applications
ethylene dichloride	AADAC	-	Mus	28189721	industrial	0	0	intermediate in PVC production
Nanotubes, Carbon	AADAC	+	Mus	25554681	industrial	0	0	multiple industrial applications
ochratoxin A	AADAC	1	Rattus	17483316	pollutant	0	0	produced by bacteria in food
Tetrachlorodibenzodioxin	AADAC	-	Rattus	21215274	pollutant	0	0	product of incomplete combustion of organic material
rosiglitazone	AADAC	+	Mus	23166672	pharmaceutical	0	0	It works as an insulin sensitizer, by binding to the PPAR in fat cells and making the cells more responsive to insulin
2,4-dinitrotoluene	AADAC	1	Rattus	21346803	industrial	0	0	precursor to toluene diisocyanate
Nanotubes, Carbon	AADAC	+	Mus	25554681	industrial	0	0	multiple industrial applications
Endosulfan	AADAC	-	Rattus	29391264	agricultural	0	0	organochlorine insecticide
Silicon Dioxide	AADAC	+	Homo	25895662	industrial	0	0	multiple industrial applications
nimesulide	AADAC	-	Rattus	24136188	pharmaceutical	0	0	nonsteroidal anti-inflammatory drug
tolcapone	AADAC	-	Rattus	24136188	pharmaceutical	0	0	Tolcapone (brand name Tasmar) is a drug used to treat Parkinson's disease (PD).
Cocaine	AADAC	-	Rattus	17898221	drug of abuse	0	0	recreational drug
Dieldrin	AADAC	-	Rattus	23153324	agricultural	0	0	pesticide
furan	AADAC	-	Rattus	26194646	pollutant	0	0	thermal degradation of natural food constituents
troglitazone	AADAC	+	Homo	25572481	pharmaceutical	0	0	antidiabetic and anti-inflammatory drug
bisphenol A	AADACL2	-	Rattus	25181051	industrial	0	0	monomer of polycarbonate plastic
Antirheumatic Agents	AADACL2	+	Homo	24449571	pharmaceutical	0	0	antirheumatic agents
Benzo(a)pyrene	AADACL3	-	Mus	23735875	pollutant	0	0	product of incomplete combustion of organic material
Dietary Sucrose	AADACL3	+	Rattus	26033743	food component	0	0	food
Copper	AADACL3	+	Rattus	26033743	industrial	0	0	multiple applications
bisphenol A	AADACL3	-	Rattus	25181051	industrial	0	0	monomer of polycarbonate plastic
benzo(k)fluoranthene	AADACL3	-	Mus	26377693	pollutant	0	0	product of incomplete combustion of organic material
Copper	AADACL4	+	Rattus	26033743	industrial	0	0	multiple applications
Dietary Sucrose	AADACL4	+	Rattus	26033743	food component	0	0	food
Acetaminophen	AADACL4	-	Homo	26690555	pharmaceutical	0	0	painkiller
bisphenol A	AADACL4	-	Rattus	25181051	industrial	0	0	monomer of polycarbonate plastic
jinfukang	AADACP1	-	Homo	27392435	pharmaceutical	0	0	Chinese herbal medicine with potential immunopotentiation activity
(+)-JQ1 compound	AADACP1	-	Homo	26752646	research	0	0	BET bromodomain inhibitor
Dietary Fats	AADAT	-	Mus	25016146	food component	0	0	food
2,4-diaminotoluene	AADAT	+	Mus	22016648	industrial	0	0	It is mainly used as a precursor to toluene diisocyanate, a precursor to polyurethane.
4,4'-diaminodiphenylmethane	AADAT	-	Rattus	25380136	industrial	0	0	precursor to polyurethanes
vinclozolin	AADAT	+	Rattus	22570695	agricultural	0	0	fungicide
Cuprizone	AADAT	1	Rattus	27523638	research	0	0	demyelination agent
Imipramine	AADAT	1	Rattus	18355885	pharmaceutical	0	0	Imipramine is used in the treatment of depression, such as depression associated with agitation or anxiety
tauroursodeoxycholic acid	AADAT	-	Rattus	15885361	pharmaceutical	endobiotic	0	naturally occuring compound in animal bile secretion, used in traditional medecine
Thalidomide	AADAT	-	Mus	26217789	pharmaceutical	0	0	anticancer drug
Quercetin	AADAT	-	Homo	21632981	food component	0	0	food additive
Endosulfan	AADAT	1	Rattus	29391264	agricultural	0	0	organochlorine insecticide
(+)-JQ1 compound	AADAT	-	Homo	26752646	research	0	0	BET bromodomain inhibitor
Ketoconazole	AADAT	1	Rattus	18355885	pharmaceutical	0	0	antifungal activity
Aflatoxin B1	AADAT	-	Homo	21632981	pollutant	0	0	fungal toxin
Benzo(a)pyrene	AADAT	-	Homo	21632981	pollutant	0	0	product of incomplete combustion of organic material
7,8-Dihydro-7,8-dihydroxybenzo(a)pyrene 9,10-oxide	AADAT	-	Homo	20018196	pollutant	0	0	metabolite of benzo(a)pyrene - product of incomplete combustion of organic material
bis(tri-n-butyltin)oxide	AADAT	+	Mus	18958704	agricultural	industrial	pollutant	Tributyltin oxide (TBTO) is an organotin compound chiefly used as a biocide (fungicide and molluscicide), especially a wood preservative
Tetrachlorodibenzodioxin	AADAT	-	Rattus	18796159	pollutant	0	0	product of incomplete combustion of organic material
Amiodarone	AADAT	1	Rattus	18355885	pharmaceutical	0	0	used to treat and prevent a number of types of irregular heartbeats
Sulfasalazine	AADAT	+	Mus	22016648	pharmaceutical	0	0	Sulfasalazine (SSZ), sold under the trade name Azulfidine among others, is a medication used to treat rheumatoid arthritis, ulcerative colitis, and Crohn's disease
Carbon Tetrachloride	AADAT	-	Mus	27339419	industrial	0	0	cleaning and other
Pregnenolone Carbonitrile	AADAT	-	Rattus	19162173	research	0	0	Pregnenolone carbonitrile is a catatoxic steroid and microsomal enzyme inducer having significant effects on the induction of cytochrome P450. It has also demonstrated the potential for protective capability against acetaminophen-induced liver damage.
Aldrin	AADAT	+	Mus	18579281	agricultural	0	0	insecticide
Chlorodiphenyl (54% Chlorine)	AADAT	-	Rattus	18178546	industrial	pollutant	0	mix of PCBs, multiple applications
Acetaminophen	AADAT	-	Homo	25704631	pharmaceutical	0	0	painkiller
3,4,5,3',4'-pentachlorobiphenyl	AADAT	-	Rattus	20959002	industrial	0	0	flame retardant
Doxorubicin	AADAT	+	Mus	22016648	pharmaceutical	0	0	chemotherapy medicine
dicrotophos	AADAT	-	Homo	28302478	agricultural	0	0	insecticide
Cyclosporine	AADAT	-	Mus	19770486	pharmaceutical	0	0	immune suppressant
Cuprizone	AADAT	+	Rattus	26577399	research	0	0	demyelination agent
Flutamide	AADAT	-	Rattus	24136188	pharmaceutical	0	0	nonsteroidal antiandrogen to treat prostate cancer
Rotenone	AADAT	-	Mus	22016648	agricultural	0	0	Rotenone is an odorless, colorless, crystalline isoflavone used as a broad-spectrum insecticide, piscicide, and pesticide
Ammonium Chloride	AADAT	1	Rattus	16483693	agricultural	0	0	fertilizer
2,6-dinitrotoluene	AADAT	1	Rattus	21346803	industrial	0	0	intermediate in production of polyuretane foams, plasticiser
Clomipramine	AADAT	1	Rattus	18355885	pharmaceutical	0	0	antidepressent It is used for the treatment of obsessive–compulsive disorder, panic disorder, major depressive disorder, and chronic pain.[4] It may decrease the risk of suicide in those over the age of 65.[4] It is taken by mouth.[4]
Phenobarbital	AADAT	-	Mus	19482888	pharmaceutical	0	0	treatment of epilepsy
Tetrachlorodibenzodioxin	AADAT	-	Rattus	20959002	pollutant	0	0	product of incomplete combustion of organic material
(+)-JQ1 compound	AADAT	-	Homo	24796395	research	0	0	BET bromodomain inhibitor
lead acetate	AADAT	+	Rattus	22641619	industrial	food component	0	used in cosmetics, in vine adulteration
1,3-butadiene	AADAT	-	Mus	29038090	industrial	0	0	monomer in the production of synthetic rubber
Clofibrate	AADAT	+	Mus	17585979	pharmaceutical	0	0	controlling the high cholesterol and triacylglyceride
pirinixic acid	AADAT	+	Mus	23811191	research	0	0	peroxisome proliferator-activated receptor alpha (PPARa) agonist
amphotericin B, deoxycholate drug combination	AADAT	-	Mus	22863853	pharmaceutical	0	0	antifungal drug
Diethylnitrosamine	AADAT	-	Mus	24535843	drug of abuse	0	0	tobacco smoke
nefazodone	AADAT	-	Rattus	24136188	pharmaceutical	0	0	antidepressant
Clofibrate	AADAT	+	Mus	23811191	pharmaceutical	0	0	controlling the high cholesterol and triacylglyceride
Ethanol	AADAT	-	Mus	19167417	food component	drug of abuse	industrial	Ethanol is naturally produced by the fermentation of sugars by yeasts or via petrochemical processes, and is most commonly consumed as a popular recreational drug
Amitriptyline	AADAT	1	Rattus	18355885	pharmaceutical	0	0	is a medicine primarily used to treat a number of mental illnesses
Valproic Acid	AADAT	1	Homo	25979313	pharmaceutical	0	0	treatment of epilepsy, bipolar disorder and migraine headaches
Vancomycin	AADAT	+	Mus	18930951	pharmaceutical	0	0	antibiotic
N-nitrosomorpholine	AADAT	+	Rattus	19716841	pollutant	0	0	disinfection byproduct of wastewater treatment
Ursodeoxycholic Acid	AADAT	-	Rattus	15885361	pharmaceutical	0	0	is one of the secondary bile acids, which are metabolic byproducts of intestinal bacteria.
zoledronic acid	AADAT	-	Homo	24714768	pharmaceutical	0	0	bone deseases treatment
vinylidene chloride	AADAT	-	Mus	26682919	industrial	0	0	coating to other plastic films to increase their barrier properties
Toluene	AADAT	+	Rattus	22166486	industrial	drug of abuse	0	many uses as chemical intermediate, used as recreational drug
Thioacetamide	AADAT	-	Rattus	23411599	research	0	0	source of sulfide ions
Aflatoxin B1	AADAT	-	Mus	19770486	pollutant	0	0	fungal toxin
Benzo(a)pyrene	AADAT	-	Mus	19770486	pollutant	0	0	product of incomplete combustion of organic material
Copper	AADAT	-	Rattus	22465980	industrial	0	0	multiple applications
Tetrachlorodibenzodioxin	AADAT	-	Rattus	21215274	pollutant	0	0	product of incomplete combustion of organic material
K 7174	AADAT	-	Homo	24086573	research	0	0	cell adhesion inhibitor, proteasome inhibitor
1-Naphthylisothiocyanate	AADAT	-	Rattus	25380136	research	0	0	a tool to study the pathogenesis of chemically induced cholestasis,
bisphenol A	AADAT	-	Rattus	25181051	industrial	0	0	monomer of polycarbonate plastic
Dimethylnitrosamine	AADAT	-	Rattus	25380136	pollutant	0	0	by-product of several industrial processes and present at very low levels in certain foodstuffs, especially those cooked, smoked, or cured
Valproic Acid	AAGAB	+	Homo	29154799	pharmaceutical	0	0	treatment of epilepsy, bipolar disorder and migraine headaches
decabromobiphenyl ether	AAGAB	+	Rattus	23640034	industrial	0	0	flame retardent
Plant Extracts	AAGAB	+	Homo	23557933	pharmaceutical	0	0	various pharmaceutical
bisphenol A	AAGAB	1	Rattus	25181051	industrial	0	0	monomer of polycarbonate plastic
pantogab	AAGAB	-	Mus	17379144	pharmaceutical	0	0	drug for neurological, psychological and psychiatric conditions
Nanotubes, Carbon	AAGAB	-	Mus	25620056	industrial	0	0	multiple industrial applications
2,6-dinitrotoluene	AAGAB	1	Rattus	21346803	industrial	0	0	intermediate in production of polyuretane foams, plasticiser
Acrylamide	AAGAB	+	Rattus	28959563	industrial	research	0	intermideate for polyacrylamide and acrylamide copolymers used in production of paper, dyes, and plastics, and in water treatment. Forms during cooking in starchy foods
Benzo(a)pyrene	AAGAB	-	Mus	19770486	pollutant	0	0	product of incomplete combustion of organic material
monobutyl phthalate	AAGAB	-	Rattus	29162477	industrial	0	0	metabolit of plasticizer Dibutyl phthalate (DBP)
2,4-dinitrotoluene	AAGAB	1	Rattus	21346803	industrial	0	0	precursor to toluene diisocyanate
Valproic Acid	AAGAB	+	Homo	28001369	pharmaceutical	0	0	treatment of epilepsy, bipolar disorder and migraine headaches
Valproic Acid	AAGAB	1	Homo	25979313	pharmaceutical	0	0	treatment of epilepsy, bipolar disorder and migraine headaches
methylmercuric chloride	AAGAB	-	Homo	28001369	pollutant	0	0	naturally occuring or results from mining and other activities
Lead	AAGAB	1	Homo	28903495	industrial	0	0	multiple applications
2',3,3',4',5-pentachloro-4-hydroxybiphenyl	AAGAB	+	Rattus	19114083	industrial	pollutant	0	metabolit of PCB126
Diuron	AAGAB	+	Rattus	21551480	agricultural	0	0	algicide and herbicide, inhibitor of photosynthesis
Nanotubes, Carbon	AAGAB	-	Mus	25620056	industrial	0	0	multiple industrial applications
Phenylmercuric Acetate	AAGAB	+	Homo	26272509	agricultural	industrial	0	antifungal activity in agriculture and in leather processing
dicrotophos	AAGAB	-	Homo	28302478	agricultural	0	0	insecticide
Valproic Acid	AAGAB	+	Mus	21427059	pharmaceutical	0	0	treatment of epilepsy, bipolar disorder and migraine headaches
Aflatoxin B1	AAGAB	+	Mus	19770486	pollutant	0	0	fungal toxin
Valproic Acid	AAGAB	+	Homo	23179753	pharmaceutical	0	0	treatment of epilepsy, bipolar disorder and migraine headaches
Ammonium Chloride	AAGAB	1	Rattus	16483693	agricultural	0	0	fertilizer
N-Methyl-3,4-methylenedioxyamphetamine	AAGAB	+	Mus	20188158	pharmaceutical	0	0	recreational drug
Cisplatin	AAK1	+	Mus	21151649	pharmaceutical	0	0	chemotherapy medication
Phenylmercuric Acetate	AAK1	+	Homo	26272509	agricultural	industrial	0	antifungal activity in agriculture and in leather processing
perfluorooctanoic acid	AAK1	+	Homo	26879310	industrial	0	0	surfactant
Propylthiouracil	AAK1	-	Rattus	24780913	pharmaceutical	0	0	antithyroid
Valproic Acid	AAK1	1	Homo	25979313	pharmaceutical	0	0	treatment of epilepsy, bipolar disorder and migraine headaches
bromfenacoum	AAK1	-	Rattus	28903499	pharmaceutical	0	0	NSAID
Acetaminophen	AAK1	+	Homo	29067470	pharmaceutical	0	0	painkiller
bisphenol A	AAK1	1	Rattus	25181051	industrial	0	0	monomer of polycarbonate plastic
Fluoxetine	AAK1	-	Rattus	17033635	pharmaceutical	0	0	It is used for the treatment of major depressive disorder, obsessive–compulsive disorder (OCD), bulimia nervosa, panic disorder and premenstrual dysphoric disorder
Dietary Fats	AAK1	+	Mus	25016146	food component	0	0	food
dicrotophos	AAK1	+	Homo	28302478	agricultural	0	0	insecticide
Valproic Acid	AAK1	+	Homo	27188386	pharmaceutical	0	0	treatment of epilepsy, bipolar disorder and migraine headaches
Copper Sulfate	AAK1	+	Homo	19549813	agricultural	0	0	fungicide and herbicide, niche uses
Acetaminophen	AAK1	-	Homo	21420995	pharmaceutical	0	0	painkiller
entinostat	AAK1	+	Homo	26272509	pharmaceutical	0	0	histone deacetylase inhibitor
Cyclosporine	AAK1	+	Homo	25562108	pharmaceutical	0	0	immune suppressant
Methyl Methanesulfonate	AAK1	+	Homo	23649840	pharmaceutical	0	0	cancer terapy, alkylating agent
Ethyl Methanesulfonate	AAK1	+	Homo	23649840	research	0	0	mutagen
Valproic Acid	AAK1	+	Homo	23179753	pharmaceutical	0	0	treatment of epilepsy, bipolar disorder and migraine headaches
trichostatin A	AAK1	+	Homo	24935251	pharmaceutical	research	0	inhibits the class I and II mammalian histone deacetylase (HDAC)
glyphosate	AAK1	-	Homo	28711546	agricultural	0	0	herbicide
trichostatin A	AAK1	+	Homo	26272509	pharmaceutical	research	0	inhibits the class I and II mammalian histone deacetylase (HDAC)
Urethane	AAK1	+	Homo	28818685	food component	pharmaceutical	0	present in alcohol beverages, used as an antineoplastic agent
Tetrachlorodibenzodioxin	AAK1	1	Mus	21570461	pollutant	0	0	product of incomplete combustion of organic material
Chloroprene	AAK1	+	Rattus	23125180	industrial	0	0	production of neoprene
Aflatoxin B1	AAK1	+	Mus	19770486	pollutant	0	0	fungal toxin
Antirheumatic Agents	AAK1	-	Homo	24449571	pharmaceutical	0	0	antirheumatic agents
vorinostat	AAK1	-	Homo	27188386	pharmaceutical	0	0	inhibit histone deacetylases (HDAC)
vinclozolin	AAK1	+	Rattus	23034163	agricultural	0	0	fungicide
2',3,3',4',5-pentachloro-4-hydroxybiphenyl	AAK1	-	Rattus	19114083	industrial	pollutant	0	metabolit of PCB126
Carbamazepine	AAK1	1	Homo	25979313	pharmaceutical	0	0	reatment of epilepsy and neuropathic pain
Valproic Acid	AAK1	+	Homo	26272509	pharmaceutical	0	0	treatment of epilepsy, bipolar disorder and migraine headaches
Valproic Acid	AAK1	+	Homo	28001369	pharmaceutical	0	0	treatment of epilepsy, bipolar disorder and migraine headaches
jinfukang	AAK1	-	Homo	27392435	pharmaceutical	0	0	Chinese herbal medicine with potential immunopotentiation activity
Formaldehyde	AAK1	+	Homo	23649840	industrial	research	cosmetics	multiple applications
Silicon Dioxide	AAMDC	-	Homo	25895662	industrial	0	0	multiple industrial applications
bisphenol A	AAMDC	-	Homo	29275510	industrial	0	0	monomer of polycarbonate plastic
Cyclosporine	AAMDC	-	Homo	27989131	pharmaceutical	0	0	immune suppressant
Aflatoxin B1	AAMDC	-	Homo	22100608	pollutant	0	0	fungal toxin
Valproic Acid	AAMDC	+	Homo	23179753	pharmaceutical	0	0	treatment of epilepsy, bipolar disorder and migraine headaches
nickel monoxide	AAMDC	+	Rattus	19167457	industrial	0	0	used in batteries
Valproic Acid	AAMDC	+	Homo	27188386	pharmaceutical	0	0	treatment of epilepsy, bipolar disorder and migraine headaches
Urethane	AAMDC	+	Homo	28818685	food component	pharmaceutical	0	present in alcohol beverages, used as an antineoplastic agent
Nickel	AAMDC	-	Homo	25583101	industrial	0	0	multiple industrial applications
Valproic Acid	AAMDC	1	Homo	25979313	pharmaceutical	0	0	treatment of epilepsy, bipolar disorder and migraine headaches
Thioacetamide	AAMDC	-	Rattus	23411599	research	0	0	source of sulfide ions
bisphenol A	AAMDC	-	Rattus	25181051	industrial	0	0	monomer of polycarbonate plastic
dicrotophos	AAMDC	-	Homo	28302478	agricultural	0	0	insecticide
tris(1,3-dichloro-2-propyl)phosphate	AAMDC	-	Homo	26179874	industrial	0	0	Flame retardant
Vincristine	AAMDC	+	Homo	23649840	pharmaceutical	0	0	chemotherapy
Ethyl Methanesulfonate	AAMDC	+	Homo	23649840	research	0	0	mutagen
potassium chromate(VI)	AAMDC	-	Homo	22714537	research	0	0	oxidizing agent in organic synthesis
C646 compound	AAMDC	+	Homo	26191083	research	0	0	C646 was used to study the role of p300 in chronic neuropathic pain in rats with chronic constriction injury
Formaldehyde	AAMDC	+	Homo	23649840	industrial	research	cosmetics	multiple applications
Valproic Acid	AAMDC	+	Homo	28001369	pharmaceutical	0	0	treatment of epilepsy, bipolar disorder and migraine headaches
Tetrachlorodibenzodioxin	AAMDC	-	Rattus	21215274	pollutant	0	0	product of incomplete combustion of organic material
Methyl Methanesulfonate	AAMDC	+	Homo	23649840	pharmaceutical	0	0	cancer terapy, alkylating agent
Valproic Acid	AAMDC	+	Rattus	29427782	pharmaceutical	0	0	treatment of epilepsy, bipolar disorder and migraine headaches
Glafenine	AAMDC	-	Rattus	24136188	pharmaceutical	0	0	nonsteroidal anti-inflammatory drug
vorinostat	AAMDC	+	Homo	27188386	pharmaceutical	0	0	inhibit histone deacetylases (HDAC)
trichostatin A	AAMDC	+	Homo	28542535	pharmaceutical	research	0	inhibits the class I and II mammalian histone deacetylase (HDAC)
Carbon Tetrachloride	AAMDC	-	Mus	27339419	industrial	0	0	cleaning and other
Cyclosporine	AAMDC	-	Homo	20106945	pharmaceutical	0	0	immune suppressant
Nanotubes, Carbon	AAMDC	-	Mus	25554681	industrial	0	0	multiple industrial applications
Nickel	AAMDC	-	Homo	24768652	industrial	0	0	multiple industrial applications
potassium chromate(VI)	AAMDC	-	Homo	22079256	research	0	0	oxidizing agent in organic synthesis
Nanotubes, Carbon	AAMDC	-	Mus	25554681	industrial	0	0	multiple industrial applications
(+)-JQ1 compound	AAMDC	+	Homo	24796395	research	0	0	BET bromodomain inhibitor
Cyclosporine	AAMDC	-	Homo	25562108	pharmaceutical	0	0	immune suppressant
Benzo(a)pyrene	AAMDC	+	Homo	22316170	pollutant	0	0	product of incomplete combustion of organic material
indole-3-carbinol	AAMDC	1	Rattus	21396975	food component	0	0	anticarcinogenic properties
Plant Extracts	AAMDC	+	Homo	23557933	pharmaceutical	0	0	various pharmaceutical
Tetrachlorodibenzodioxin	AAMP	1	Mus	21570461	pollutant	0	0	product of incomplete combustion of organic material
potassium perchlorate	AAMP	-	Homo	29673971	pharmaceutical	industrial	0	oxidizer used in fireworks, ammunition percussion caps, explosive primers, and is used variously in propellants, flash compositions, stars, and sparklers. Also used as antithyroid agent to treat hyperthyroidism.
Flutamide	AAMP	+	Rattus	24136188	pharmaceutical	0	0	nonsteroidal antiandrogen to treat prostate cancer
4-dichlorobenzene	AAMP	+	Mus	26975756	agricultural	industrial	cosmetics	used as a disinfectant, pesticide, and deodorant, most familiarly in mothballs
Valproic Acid	AAMP	+	Homo	29154799	pharmaceutical	0	0	treatment of epilepsy, bipolar disorder and migraine headaches
Progesterone	AAMP	+	Homo	18497975	pharmaceutical	cosmetics	endobiotic	hormone
Plant Extracts	AAMP	+	Homo	23557933	pharmaceutical	0	0	various pharmaceutical
Nickel	AAMP	-	Homo	23195993	industrial	0	0	multiple industrial applications
Benzo(a)pyrene	AAMP	+	Mus	22228805	pollutant	0	0	product of incomplete combustion of organic material
Air Pollutants, Occupational	AAMP	-	Homo	23195993	pollutant	0	0	occupational air pollutants
vinclozolin	AAMP	-	Rattus	23034163	agricultural	0	0	fungicide
2,6-dinitrotoluene	AAMP	1	Rattus	21346803	industrial	0	0	intermediate in production of polyuretane foams, plasticiser
nefazodone	AAMP	+	Rattus	24136188	pharmaceutical	0	0	antidepressant
Ethinyl Estradiol	AAMP	+	Mus	17942748	pharmaceutical	0	0	used as birth control pill, mimics estrogen
Tetrachlorodibenzodioxin	AAMP	+	Mus	17942748	pollutant	0	0	product of incomplete combustion of organic material
C646 compound	AAMP	-	Homo	26191083	research	0	0	C646 was used to study the role of p300 in chronic neuropathic pain in rats with chronic constriction injury
bisphenol A	AAMP	+	Rattus	25181051	industrial	0	0	monomer of polycarbonate plastic
Cadmium	AAMP	-	Mus	24067728	industrial	0	0	multiple applications, contaminates food and water
Clofibrate	AAMP	-	Mus	17585979	pharmaceutical	0	0	controlling the high cholesterol and triacylglyceride
butyraldehyde	AANAT	-	Homo	26079696	industrial	0	0	intermediate in chemical industry
Ammonium Chloride	AANAT	1	Rattus	16483693	agricultural	0	0	fertilizer
propionaldehyde	AANAT	-	Homo	26079696	industrial	0	0	intermediate in chemical industry
bisphenol A	AANAT	-	Rattus	25181051	industrial	0	0	monomer of polycarbonate plastic
cobaltous chloride	AAR2	+	Homo	19320972	industrial	0	0	moisture detector
Benzo(a)pyrene	AAR2	+	Homo	20106945	pollutant	0	0	product of incomplete combustion of organic material
Benzo(a)pyrene	AAR2	+	Homo	21632981	pollutant	0	0	product of incomplete combustion of organic material
Tobacco Smoke Pollution	AAR2	+	Homo	28065790	drug of abuse	pollutant	0	Tobacco smoke
bisphenol A	AAR2	-	Rattus	25181051	industrial	0	0	monomer of polycarbonate plastic
decabromobiphenyl ether	AAR2	+	Rattus	23640034	industrial	0	0	flame retardent
Benzene	AAR2	+	Homo	19162166	industrial	pollutant	0	natural constituent of crude oil, used mainly as an intermediate to make other chemicals, as additive to gazoline
potassium chromate(VI)	AAR2	+	Homo	22079256	research	0	0	oxidizing agent in organic synthesis
leflunomide	AAR2	-	Homo	28988120	pharmaceutical	0	0	used in active moderate-to-severe rheumatoid arthritis and psoriatic arthritis
Acetaminophen	AARD	-	Homo	22230336	pharmaceutical	0	0	painkiller
Silicon Dioxide	AARD	-	Mus	23221170	industrial	0	0	multiple industrial applications
Propylthiouracil	AARD	+	Rattus	24780913	pharmaceutical	0	0	antithyroid
Nanotubes, Carbon	AARD	-	Mus	25554681	industrial	0	0	multiple industrial applications
Benzo(a)pyrene	AARD	-	Mus	21569818	pollutant	0	0	product of incomplete combustion of organic material
Dibutyl Phthalate	AARD	-	Mus	21266533	industrial	0	0	plasticizer
bisphenol A	AARD	-	Homo	27685785	industrial	0	0	monomer of polycarbonate plastic
Progesterone	AARD	+	Mus	22238285	pharmaceutical	cosmetics	endobiotic	hormone
bisphenol A	AARD	-	Rattus	25181051	industrial	0	0	monomer of polycarbonate plastic
(+)-JQ1 compound	AARD	+	Homo	24796395	research	0	0	BET bromodomain inhibitor
Benzo(a)pyrene	AARD	+	Mus	22610609	pollutant	0	0	product of incomplete combustion of organic material
Ammonium Chloride	AARD	1	Rattus	16483693	agricultural	0	0	fertilizer
Benzo(a)pyrene	AARD	-	Mus	22228805	pollutant	0	0	product of incomplete combustion of organic material
Acrylamide	AARD	-	Rattus	28959563	industrial	research	0	intermideate for polyacrylamide and acrylamide copolymers used in production of paper, dyes, and plastics, and in water treatment. Forms during cooking in starchy foods
furan	AARD	+	Rattus	27387713	pollutant	0	0	thermal degradation of natural food constituents
glycidol	AARD	-	Rattus	24395379	industrial	0	0	used in surface coatings, chemical synthesis, pharmaceuticals, sanitary chemicals and sterilizing milk of magnesia, and as a gelation agent in solid propellants
Nanotubes, Carbon	AARD	-	Mus	25554681	industrial	0	0	multiple industrial applications
Valproic Acid	AARD	+	Rattus	23665938	pharmaceutical	0	0	treatment of epilepsy, bipolar disorder and migraine headaches
BEP protocol	AARD	+	Rattus	18987330	pharmaceutical	0	0	used as combination of multi drugs to treat cancer
1,2,5,6-dibenzanthracene	AARD	+	Mus	26377693	pollutant	0	0	PAH resulting from combustion of organic material
Calcitriol	AARD	+	Homo	26485663	pharmaceutical	0	0	vitamin D3
Diethylstilbestrol	AARD	-	Mus	17394237	pharmaceutical	0	0	is an estrogen medication which is mostly no longer used
Calcifediol	AARD	+	Rattus	17293106	endobiotic	0	0	naturally occuring phermone produced by liver by hydroxylation of vitamin D3, used as a marker of Vitamin D deficiency
titanium dioxide	AARD	+	Mus	23557971	food component	cosmetics	industrial	pigments, sunscreen and other
Endosulfan	AARD	-	Rattus	29391264	agricultural	0	0	organochlorine insecticide
Ethinyl Estradiol	AARS	+	Mus	24096037	pharmaceutical	0	0	used as birth control pill, mimics estrogen
2,2',4,4'-tetrabromodiphenyl ether	AARS	+	Homo	19095052	industrial	0	0	flame retardent
tris(1,3-dichloro-2-propyl)phosphate	AARS	+	Homo	26179874	industrial	0	0	Flame retardant
GSK-J4	AARS	-	Homo	29301935	research	0	0	jumonji H3K27 demethylase inhibitor
lead acetate	AARS	+	Rattus	11578147	industrial	food component	0	used in cosmetics, in vine adulteration
Nanotubes, Carbon	AARS	+	Mus	25554681	industrial	0	0	multiple industrial applications
Cyclosporine	AARS	+	Rattus	25596134	pharmaceutical	0	0	immune suppressant
tolcapone	AARS	+	Rattus	24136188	pharmaceutical	0	0	Tolcapone (brand name Tasmar) is a drug used to treat Parkinson's disease (PD).
o,p'-DDT	AARS	+	Mus	24096037	agricultural	pollutant	0	metabolite of DDT
Cyclosporine	AARS	+	Homo	25562108	pharmaceutical	0	0	immune suppressant
pirinixic acid	AARS	-	Mus	23811191	research	0	0	peroxisome proliferator-activated receptor alpha (PPARa) agonist
Ethinyl Estradiol	AARS	+	Rattus	24096037	pharmaceutical	0	0	used as birth control pill, mimics estrogen
JP8 aviation fuel	AARS	-	Homo	16835149	industrial	0	0	used in jet aircrafts, banned in 1995
Environmental Pollutants	AARS	+	Rattus	20064776	pollutant	0	0	environmental pollutants
Ethinyl Estradiol	AARS	+	Mus	17942748	pharmaceutical	0	0	used as birth control pill, mimics estrogen
Valproic Acid	AARS	1	Homo	25979313	pharmaceutical	0	0	treatment of epilepsy, bipolar disorder and migraine headaches
Thapsigargin	AARS	+	Mus	24648495	research	0	0	tumor promoter, inhibitor of the sarco/endoplasmic reticulum Ca²? ATPase
Acetaminophen	AARS	+	Homo	29067470	pharmaceutical	0	0	painkiller
cobaltous chloride	AARS	-	Homo	19320972	industrial	0	0	moisture detector
Aflatoxin B1	AARS	-	Mus	19770486	pollutant	0	0	fungal toxin
Nanotubes, Carbon	AARS	+	Mus	25554681	industrial	0	0	multiple industrial applications
Tetrachlorodibenzodioxin	AARS	+	Mus	17942748	pollutant	0	0	product of incomplete combustion of organic material
Cyclosporine	AARS	+	Homo	25596134	pharmaceutical	0	0	immune suppressant
Fenofibrate	AARS	+	Rattus	25596134	pharmaceutical	0	0	It is mainly used to reduce cholesterol levels in people at risk of cardiovascular disease
Endosulfan	AARS	+	Rattus	29391264	agricultural	0	0	organochlorine insecticide
Chlorodiphenyl (54% Chlorine)	AARS	+	Mus	23650126	industrial	pollutant	0	mix of PCBs, multiple applications
Cyclosporine	AARS	+	Mus	25224403	pharmaceutical	0	0	immune suppressant
Particulate Matter	AARS	-	Homo	24769257	pollutant	0	0	Air contaminants
Coumestrol	AARS	+	Homo	19167446	food component	0	0	natural organic present in vegetables, estrogenic activity
Tetrachlorodibenzodioxin	AARS	1	Mus	21570461	pollutant	0	0	product of incomplete combustion of organic material
Cisplatin	AARS	-	Homo	25596134	pharmaceutical	0	0	chemotherapy medication
Clodronic Acid	AARS	-	Homo	25596134	pharmaceutical	0	0	It is an anti-osteoporotic drug approved for the prevention and treatment of osteoporosis in post-menopausal women and men to reduce vertebral fractures, hyperparathyroidism, hypercalcemia in malignancy, multiple myeloma and fracture related pain because of its potent anti-inflammatory and analgesic effects
Air Pollutants, Occupational	AARS	-	Homo	23195993	pollutant	0	0	occupational air pollutants
nickel monoxide	AARS	+	Rattus	19167457	industrial	0	0	used in batteries
C646 compound	AARS	+	Homo	26191083	research	0	0	C646 was used to study the role of p300 in chronic neuropathic pain in rats with chronic constriction injury
bisphenol A	AARS	+	Homo	29275510	industrial	0	0	monomer of polycarbonate plastic
n-butoxyethanol	AARS	+	Mus	19812364	industrial	0	0	As a relatively nonvolatile, inexpensive solvent of low toxicity, it is used in many domestic and industrial products because of its properties as a surfactant.
chloropicrin	AARS	-	Homo	26352163	agricultural	chemical warfare	0	used as a broad-spectrum antimicrobial, fungicide, herbicide, insecticide, and nematicide
Dexamethasone	AARS	-	Mus	22733784	pharmaceutical	0	0	It is used in the treatment of many conditions, including rheumatic problems, a number of skin diseases, severe allergies, asthma, chronic obstructive lung disease, croup, brain swelling, and along with antibiotics in tuberculosis.
Carbamazepine	AARS	1	Homo	25979313	pharmaceutical	0	0	reatment of epilepsy and neuropathic pain
Zinc	AARS	+	Homo	22171008	industrial	0	0	multiple industrial applications
N,N,N',N'-tetrakis(2-pyridylmethyl)ethylenediamine	AARS	-	Homo	19013360	pharmaceutical	0	0	is an intracellular membrane-permeable ion chelator, used in chelation therapy to remove toxic metals in the body
ICG 001	AARS	+	Homo	26191083	research	0	0	target Wnt-b signalling
entinostat	AARS	+	Homo	26272509	pharmaceutical	0	0	histone deacetylase inhibitor
Flutamide	AARS	+	Rattus	24136188	pharmaceutical	0	0	nonsteroidal antiandrogen to treat prostate cancer
titanium dioxide	AARS	+	Mus	23557971	food component	cosmetics	industrial	pigments, sunscreen and other
Genistein	AARS	+	Homo	26865667	food component	0	0	Genistein is an isoflavone that is described as an angiogenesis inhibitor and a phytoestrogen.
Tetrachlorodibenzodioxin	AARS	+	Mus	16467188	pollutant	0	0	product of incomplete combustion of organic material
trimellitic anhydride	AARS	+	Mus	19042947	industrial	0	0	plasticizer
Cyclosporine	AARS	+	Homo	22147139	pharmaceutical	0	0	immune suppressant
Metformin	AARS	+	Rattus	25596134	pharmaceutical	0	0	is the first-line medication for the treatment of type 2 diabetes, particularly in people who are overweight
cidofovir	AARS	-	Homo	25596134	pharmaceutical	0	0	Cidofovir (brand name Vistide) is an injectable antiviral medication primarily used as a treatment for cytomegalovirus (CMV) retinitis (an infection of the retina of the eye) in people with AIDS
Dibutyl Phthalate	AARS	-	Rattus	21266533	industrial	0	0	plasticizer
Oxygen	AARS	-	Homo	25596134	environment	0	0	air component
zoledronic acid	AARS	-	Homo	25596134	pharmaceutical	0	0	bone deseases treatment
Gentamicins	AARS	+	Rattus	22061828	pharmaceutical	0	0	antibiotic
Cisplatin	AARS	1	Homo	23300844	pharmaceutical	0	0	chemotherapy medication
bisphenol A	AARS	+	Rattus	25181051	industrial	0	0	monomer of polycarbonate plastic
Zearalenone	AARS	-	Mus	25058043	pollutant	0	0	mycotoxin, is a potent estrogenic metabolite
Cyclosporine	AARS	+	Homo	21632981	pharmaceutical	0	0	immune suppressant
Nickel	AARS	-	Homo	23195993	industrial	0	0	multiple industrial applications
(4-amino-1,4-dihydro-3-(2-pyridyl)-5-thioxo-1,2,4-triazole)copper(II)	AARS	+	Homo	19561079	pharmaceutical	0	0	probabale anticancer candidate
titanium dioxide	AARS	+	Mus	27760801	food component	cosmetics	industrial	pigments, sunscreen and other
1-Methyl-4-phenylpyridinium	AARS	+	Homo	24810058	agricultural	0	0	herbicide, research
T-2 Toxin	AARS	-	Rattus	26141394	pollutant	0	0	toxin produced by fungus, contaminates food
Cyclosporine	AARS	+	Homo	25224403	pharmaceutical	0	0	immune suppressant
Cyclosporine	AARS	+	Homo	20106945	pharmaceutical	0	0	immune suppressant
Tunicamycin	AARS	+	Homo	22378314	research	0	0	causes cell cycle arrest in G1 phase
perfluorooctanoic acid	AARS	+	Homo	26879310	industrial	0	0	surfactant
Ethinyl Estradiol	AARS	1	Rattus	26865667	pharmaceutical	0	0	used as birth control pill, mimics estrogen
bromfenacoum	AARS	+	Rattus	28903499	pharmaceutical	0	0	NSAID
cobaltous chloride	AARS	+	Rattus	24386269	industrial	0	0	moisture detector
decitabine	AARS	1	Homo	23300844	pharmaceutical	0	0	treat blood related disorders
Ethinyl Estradiol	AARS	+	Mus	16467188	pharmaceutical	0	0	used as birth control pill, mimics estrogen
Cadmium Chloride	AARS	-	Homo	25596134	industrial	0	0	multiple industrial applications
vinclozolin	AARS	-	Rattus	23034163	agricultural	0	0	fungicide
sodium arsenite	AARS	-	Homo	28595984	agricultural	industrial	0	primarily used as a pesticide, but has other uses such as hide preservative, antiseptic, dyeing, and soaps
o,p'-DDT	AARS	+	Rattus	24096037	agricultural	pollutant	0	metabolite of DDT
Piroxicam	AARS	-	Homo	21858171	pharmaceutical	0	0	nonsteroidal anti-inflammatory drug (NSAID) of the oxicam class used to relieve the symptoms of painful inflammatory conditions like arthritis
Cyclosporine	AARS	+	Homo	27989131	pharmaceutical	0	0	immune suppressant
Phenobarbital	AARS	1	Homo	19159669	pharmaceutical	0	0	treatment of epilepsy
chloroacetaldehyde	AARS	-	Homo	25596134	industrial	0	0	chemical intermediate in production of many drugs, facilitate bark removal from tree trunks
Sodium Fluoride	AARS2	+	Mus	28918527	food component	industrial	agricultural	added to drinking water to maintain dental health, used as cleaning agent, in chemical synthesis and metallurgy and as insecticide
Valproic Acid	AARS2	1	Homo	25979313	pharmaceutical	0	0	treatment of epilepsy, bipolar disorder and migraine headaches
butylparaben	AARS2	+	Homo	17121429	industrial	cosmetics	food component	It has proven to be a highly successful antimicrobial preservative in cosmetics. It is also used in medication suspensions, and as a flavoring additive in food.
Atrazine	AARS2	-	Homo	22378314	agricultural	0	0	herbicide
Nanotubes, Carbon	AARS2	-	Mus	25620056	industrial	0	0	multiple industrial applications
1-Methyl-4-phenylpyridinium	AARS2	-	Homo	24806433	agricultural	0	0	herbicide, research
GSK-J4	AARS2	-	Homo	29301935	research	0	0	jumonji H3K27 demethylase inhibitor
methylparaben	AARS2	+	Homo	17121429	industrial	cosmetics	food component	Methylparaben is an anti-fungal agent often used in a variety of cosmetics and personal-care products. It is also used as a food preservative and has the E number E218.
Tetrachlorodibenzodioxin	AARS2	1	Mus	21570461	pollutant	0	0	product of incomplete combustion of organic material
Valproic Acid	AARS2	1	Mus	17963808	pharmaceutical	0	0	treatment of epilepsy, bipolar disorder and migraine headaches
nickel monoxide	AARS2	+	Rattus	19167457	industrial	0	0	used in batteries
dicrotophos	AARS2	+	Homo	28302478	agricultural	0	0	insecticide
Cadmium Chloride	AARS2	-	Homo	24527689	industrial	0	0	multiple industrial applications
Tetrachlorodibenzodioxin	AARS2	-	Rattus	21215274	pollutant	0	0	product of incomplete combustion of organic material
Ethyl Methanesulfonate	AARSD1	-	Homo	23649840	research	0	0	mutagen
Benzo(a)pyrene	AARSD1	-	Mus	15034205	pollutant	0	0	product of incomplete combustion of organic material
Tetrachlorodibenzodioxin	AARSD1	1	Mus	21570461	pollutant	0	0	product of incomplete combustion of organic material
Tetrachlorodibenzodioxin	AARSD1	-	Mus	15034205	pollutant	0	0	product of incomplete combustion of organic material
Vanadates	AARSD1	-	Homo	22714537	industrial	research	0	Vanadate is a potent inhibitor of certain plasma membrane ATPases. Present in rocks
Urethane	AARSD1	-	Homo	28818685	food component	pharmaceutical	0	present in alcohol beverages, used as an antineoplastic agent
2,3,7,8-tetrachlorodibenzofuran	AARSD1	1	Mus	20702594	pollutant	0	0	product of incomplete combustion of organic material
Cyclosporine	AARSD1	+	Homo	20106945	pharmaceutical	0	0	immune suppressant
Tetrachlorodibenzodioxin	AARSD1	1	Mus	20702594	pollutant	0	0	product of incomplete combustion of organic material
Aflatoxin B1	AARSD1	-	Mus	19770486	pollutant	0	0	fungal toxin
Valproic Acid	AARSD1	1	Mus	17292431	pharmaceutical	0	0	treatment of epilepsy, bipolar disorder and migraine headaches
Benzo(a)pyrene	AARSD1	+	Mus	22228805	pollutant	0	0	product of incomplete combustion of organic material
Tretinoin	AARSD1	-	Homo	23724009	pharmaceutical	0	0	treatment of acne and acute promyelocytic leukemia
bisphenol A	AARSD1	-	Rattus	25181051	industrial	0	0	monomer of polycarbonate plastic
Potassium Dichromate	AASDH	-	Mus	23608068	industrial	0	0	used as cleaning agent, as cenment component and in photography
Tretinoin	AASDH	+	Rattus	20488242	pharmaceutical	0	0	treatment of acne and acute promyelocytic leukemia
Nanotubes, Carbon	AASDH	-	Mus	25554681	industrial	0	0	multiple industrial applications
Aflatoxin B1	AASDH	+	Mus	19770486	pollutant	0	0	fungal toxin
Cadmium Chloride	AASDH	+	Homo	26472689	industrial	0	0	multiple industrial applications
(+)-JQ1 compound	AASDH	+	Homo	24796395	research	0	0	BET bromodomain inhibitor
Atrazine	AASDH	-	Homo	22378314	agricultural	0	0	herbicide
Soman	AASDH	-	Rattus	19281266	chemical warfare	0	0	chemical warfare
Nanotubes, Carbon	AASDH	-	Mus	25554681	industrial	0	0	multiple industrial applications
bisphenol A	AASDH	1	Rattus	25181051	industrial	0	0	monomer of polycarbonate plastic
potassium chromate(VI)	AASDH	-	Homo	22079256	research	0	0	oxidizing agent in organic synthesis
Valproic Acid	AASDH	-	Homo	23179753	pharmaceutical	0	0	treatment of epilepsy, bipolar disorder and migraine headaches
vinclozolin	AASDH	+	Rattus	23034163	agricultural	0	0	fungicide
jinfukang	AASDH	-	Homo	27392435	pharmaceutical	0	0	Chinese herbal medicine with potential immunopotentiation activity
1,4-bis(2-(3,5-dichloropyridyloxy))benzene	AASDH	-	Mus	21354444	research	0	0	potent CAR ligand
benz(a)anthracene	AASDH	1	Mus	26377693	pollutant	0	0	product of incomplete combustion of organic material
troglitazone	AASDH	-	Mus	28973697	pharmaceutical	0	0	antidiabetic and anti-inflammatory drug
dicrotophos	AASDH	-	Homo	28302478	agricultural	0	0	insecticide
Tetrachlorodibenzodioxin	AASDH	1	Mus	21570461	pollutant	0	0	product of incomplete combustion of organic material
Urethane	AASDH	-	Homo	28818685	food component	pharmaceutical	0	present in alcohol beverages, used as an antineoplastic agent
jinfukang	AASDHPPT	-	Homo	27392435	pharmaceutical	0	0	Chinese herbal medicine with potential immunopotentiation activity
dicrotophos	AASDHPPT	-	Homo	28302478	agricultural	0	0	insecticide
Zinc	AASDHPPT	-	Homo	22171008	industrial	0	0	multiple industrial applications
Tretinoin	AASDHPPT	+	Homo	23724009	pharmaceutical	0	0	treatment of acne and acute promyelocytic leukemia
nefazodone	AASDHPPT	+	Rattus	24136188	pharmaceutical	0	0	antidepressant
beta-methylcholine	AASDHPPT	1	Homo	21179406	pharmaceutical	0	0	Methacholine is primarily used to diagnose bronchial hyperreactivity,[1] which is the hallmark of asthma and also occurs in chronic obstructive pulmonary disease
Nanotubes, Carbon	AASDHPPT	-	Mus	25620056	industrial	0	0	multiple industrial applications
Benzo(a)pyrene	AASDHPPT	+	Rattus	21839799	pollutant	0	0	product of incomplete combustion of organic material
Nanotubes, Carbon	AASDHPPT	+	Mus	25554681	industrial	0	0	multiple industrial applications
Acetaminophen	AASDHPPT	-	Homo	21420995	pharmaceutical	0	0	painkiller
cupric chloride	AASDHPPT	-	Homo	17211630	industrial	0	0	catalist in organic synthesis
torcetrapib	AASDHPPT	+	Homo	23228038	pharmaceutical	0	0	drug to treat hypercholesterolemia and prevent cardiovascular disease
bisphenol A	AASDHPPT	+	Rattus	25181051	industrial	0	0	monomer of polycarbonate plastic
Flutamide	AASDHPPT	+	Rattus	24136188	pharmaceutical	0	0	nonsteroidal antiandrogen to treat prostate cancer
Phenobarbital	AASDHPPT	1	Mus	23091169	pharmaceutical	0	0	treatment of epilepsy
pantogab	AASDHPPT	-	Mus	17379144	pharmaceutical	0	0	drug for neurological, psychological and psychiatric conditions
vorinostat	AASDHPPT	-	Homo	27188386	pharmaceutical	0	0	inhibit histone deacetylases (HDAC)
Silver	AASDHPPT	-	Mus	27131904	industrial	0	0	many applications
titanium dioxide	AASS	-	Mus	27760801	food component	cosmetics	industrial	pigments, sunscreen and other
Tetrachlorodibenzodioxin	AASS	-	Homo	21632981	pollutant	0	0	product of incomplete combustion of organic material
propionaldehyde	AASS	+	Homo	26079696	industrial	0	0	intermediate in chemical industry
Nanotubes, Carbon	AASS	-	Mus	25554681	industrial	0	0	multiple industrial applications
pyrachlostrobin	AASS	+	Mus	27029645	agricultural	0	0	fungicide
Aflatoxin B1	AASS	-	Mus	19770486	pollutant	0	0	fungal toxin
propiconazole	AASS	-	Mus	22334560	agricultural	0	0	demethylation inhibiting fungicide
Tetrachlorodibenzodioxin	AASS	-	Mus	19770486	pollutant	0	0	product of incomplete combustion of organic material
1,4-bis(2-(3,5-dichloropyridyloxy))benzene	AASS	-	Mus	28903501	research	0	0	potent CAR ligand
Cephaloridine	AASS	-	Rattus	18500788	pharmaceutical	0	0	Antibiotic
1-(4-methoxyphenyl)piperazine	AASS	-	Rattus	26821219	drug of abuse	0	0	is a piperazine derivative with stimulant effects which has been sold as an ingredient in "Party pills", initially in New Zealand and subsequently in other countries around the world.
Vanadates	AASS	-	Homo	22714537	industrial	research	0	Vanadate is a potent inhibitor of certain plasma membrane ATPases. Present in rocks
2,6-dinitrotoluene	AASS	1	Rattus	21346803	industrial	0	0	intermediate in production of polyuretane foams, plasticiser
Fenretinide	AASS	+	Mus	28973697	pharmaceutical	0	0	treatment of cancer
Tetrachlorodibenzodioxin	AASS	-	Rattus	21215274	pollutant	0	0	product of incomplete combustion of organic material
Cyclosporine	AASS	-	Homo	20106945	pharmaceutical	0	0	immune suppressant
4-toluidine	AASS	-	Rattus	27638505	industrial	0	0	precursor to the pesticides metolachlor and acetochlor, dyes, glue
Pentachlorophenol	AASS	+	Mus	23892564	agricultural	industrial	0	pesticide and a disinfectant
nickel sulfate	AASS	-	Homo	22714537	industrial	0	0	electroplating of nickel
Buspirone	AASS	+	Rattus	24136188	pharmaceutical	0	0	anxiolytic drug
perfluorooctane sulfonic acid	AASS	-	Homo	27153767	industrial	pollutant	0	multiple uses as fluorosurfactant
Acetaminophen	AASS	-	Homo	22230336	pharmaceutical	0	0	painkiller
pantogab	AASS	+	Mus	17379144	pharmaceutical	0	0	drug for neurological, psychological and psychiatric conditions
Benzo(a)pyrene	AASS	-	Homo	21632981	pollutant	0	0	product of incomplete combustion of organic material
7,8-Dihydro-7,8-dihydroxybenzo(a)pyrene 9,10-oxide	AASS	+	Homo	26238291	pollutant	0	0	metabolite of benzo(a)pyrene - product of incomplete combustion of organic material
Zinc	AASS	-	Homo	18356318	industrial	0	0	multiple industrial applications
leflunomide	AASS	-	Rattus	24136188	pharmaceutical	0	0	used in active moderate-to-severe rheumatoid arthritis and psoriatic arthritis
Phenylmercuric Acetate	AASS	-	Homo	26272509	agricultural	industrial	0	antifungal activity in agriculture and in leather processing
cyproconazole	AASS	-	Mus	22334560	agricultural	0	0	cyproconazole is used against powdery mildew, rust on cereals and apple scab, and applied by air or on the ground to cereal crops, coffee, sugar beet, fruit trees and grapes
Cyclosporine	AASS	-	Homo	25562108	pharmaceutical	0	0	immune suppressant
Valproic Acid	AASS	-	Homo	24935251	pharmaceutical	0	0	treatment of epilepsy, bipolar disorder and migraine headaches
Carbon Tetrachloride	AASS	-	Mus	27339419	industrial	0	0	cleaning and other
1-piperonylpiperazine	AASS	-	Rattus	26821219	drug of abuse	0	0	ectasy pill
epoxiconazole	AASS	-	Mus	22334560	agricultural	0	0	Epoxiconazole is a fungicide active ingredient from the class of azoles developed to protect crops
Benzo(a)pyrene	AASS	-	Homo	20106945	pollutant	0	0	product of incomplete combustion of organic material
Soot	AASS	-	Mus	26551751	pollutant	0	0	air pollutant
Flutamide	AASS	-	Rattus	24136188	pharmaceutical	0	0	nonsteroidal antiandrogen to treat prostate cancer
benzo(b)fluoranthene	AASS	-	Mus	26377693	industrial	pollutant	0	byproduct of combustion of organic material
vinylidene chloride	AASS	-	Mus	26682919	industrial	0	0	coating to other plastic films to increase their barrier properties
Valproic Acid	AASS	+	Homo	29154799	pharmaceutical	0	0	treatment of epilepsy, bipolar disorder and migraine headaches
furan	AASS	-	Rattus	25539665	pollutant	0	0	thermal degradation of natural food constituents
Ozone	AASS	+	Rattus	25838073	environment	0	0	atmosphere gas
Nanotubes, Carbon	AASS	-	Mus	25554681	industrial	0	0	multiple industrial applications
Arsenic	AASS	-	Mus	19654921	industrial	0	0	used in the production of pesticides, treated wood products, herbicides, and insecticides
Hydrogen Peroxide	AASS	1	Homo	20044591	industrial	0	0	industrial, pharmaceutical
Estradiol	AASS	-	Homo	20106945	pharmaceutical	endobiotic	0	female reproductive hoormone
Acetaminophen	AASS	-	Homo	29067470	pharmaceutical	0	0	painkiller
bisphenol A	AASS	-	Rattus	25181051	industrial	0	0	monomer of polycarbonate plastic
pirinixic acid	AASS	+	Mus	18445702	research	0	0	peroxisome proliferator-activated receptor alpha (PPARa) agonist
2,4-dinitrotoluene	AASS	1	Rattus	21346803	industrial	0	0	precursor to toluene diisocyanate
Silver	AASS	+	Mus	19429238	industrial	0	0	many applications
(+)-JQ1 compound	AASS	+	Homo	22904298	research	0	0	BET bromodomain inhibitor
Valproic Acid	AASS	1	Homo	25979313	pharmaceutical	0	0	treatment of epilepsy, bipolar disorder and migraine headaches
pirinixic acid	AASS	-	Rattus	22484513	research	0	0	peroxisome proliferator-activated receptor alpha (PPARa) agonist
Valproic Acid	AASS	-	Mus	21427059	pharmaceutical	0	0	treatment of epilepsy, bipolar disorder and migraine headaches
S-2-pentyl-4-pentynoic hydroxamic acid	AASS	-	Mus	21427059	pharmaceutical	0	0	derivative of valproic acid - treatment of epilepsy, bipolar disorder and migraine headaches
N-benzylpiperazine	AASS	-	Rattus	26821219	drug of abuse	0	0	recreational drug
rosiglitazone	AASS	-	Homo	25572481	pharmaceutical	0	0	It works as an insulin sensitizer, by binding to the PPAR in fat cells and making the cells more responsive to insulin
Cisplatin	AASS	-	Rattus	22023808	pharmaceutical	0	0	chemotherapy medication
Quercetin	AASS	-	Homo	21632981	food component	0	0	food additive
Benzo(a)pyrene	AASS	-	Mus	19770486	pollutant	0	0	product of incomplete combustion of organic material
Pregnenolone Carbonitrile	AASS	+	Mus	28903501	research	0	0	Pregnenolone carbonitrile is a catatoxic steroid and microsomal enzyme inducer having significant effects on the induction of cytochrome P450. It has also demonstrated the potential for protective capability against acetaminophen-induced liver damage.
Propylthiouracil	AASS	-	Rattus	24780913	pharmaceutical	0	0	antithyroid
4,4'-diaminodiphenylmethane	AASS	+	Mus	18648102	industrial	0	0	precursor to polyurethanes
Tetrachlorodibenzodioxin	AASS	-	Rattus	21724226	pollutant	0	0	product of incomplete combustion of organic material
Endosulfan	AASS	-	Rattus	29391264	agricultural	0	0	organochlorine insecticide
fumonisin B1	AASS	-	Mus	16221962	pollutant	0	0	toxin present in food, produced by molds
Tetrachlorodibenzodioxin	AASS	-	Homo	20106945	pollutant	0	0	product of incomplete combustion of organic material
Cyclosporine	AASS	-	Mus	19770486	pharmaceutical	0	0	immune suppressant
Vancomycin	AASS	+	Mus	18930951	pharmaceutical	0	0	antibiotic
cypermethrin	AASS	+	Mus	21142847	agricultural	0	0	synthetic pyrethroid used as an insecticide
Silicon Dioxide	AASS	-	Homo	25895662	industrial	0	0	multiple industrial applications
cobaltous chloride	AASS	-	Homo	19320972	industrial	0	0	moisture detector
Thioacetamide	AASS	-	Rattus	23411599	research	0	0	source of sulfide ions
pirinixic acid	AAT1	-	Rattus	17164430	research	0	0	peroxisome proliferator-activated receptor alpha (PPARa) agonist
Dietary Fats	AAT1	+	Rattus	17164430	food component	0	0	food
Nickel	AATBC	-	Homo	24768652	industrial	0	0	multiple industrial applications
Cisplatin	AATBC	-	Homo	27392435	pharmaceutical	0	0	chemotherapy medication
jinfukang	AATBC	-	Homo	27392435	pharmaceutical	0	0	Chinese herbal medicine with potential immunopotentiation activity
Tetrachlorodibenzodioxin	AATF	-	Rattus	21215274	pollutant	0	0	product of incomplete combustion of organic material
Benzo(a)pyrene	AATF	-	Mus	19770486	pollutant	0	0	product of incomplete combustion of organic material
tauroursodeoxycholic acid	AATF	+	Rattus	15885361	pharmaceutical	endobiotic	0	naturally occuring compound in animal bile secretion, used in traditional medecine
Thioacetamide	AATF	+	Rattus	23411599	research	0	0	source of sulfide ions
Ammonium Chloride	AATF	1	Rattus	16483693	agricultural	0	0	fertilizer
Flutamide	AATF	-	Rattus	24793618	pharmaceutical	0	0	nonsteroidal antiandrogen to treat prostate cancer
Vanadates	AATF	-	Homo	22714537	industrial	research	0	Vanadate is a potent inhibitor of certain plasma membrane ATPases. Present in rocks
C646 compound	AATF	-	Homo	26191083	research	0	0	C646 was used to study the role of p300 in chronic neuropathic pain in rats with chronic constriction injury
Ketoconazole	AATF	-	Rattus	25787151	pharmaceutical	0	0	antifungal activity
bisphenol A	AATF	1	Rattus	25181051	industrial	0	0	monomer of polycarbonate plastic
Tetrachlorodibenzodioxin	AATF	1	Mus	21570461	pollutant	0	0	product of incomplete combustion of organic material
Ethinyl Estradiol	AATF	+	Mus	17942748	pharmaceutical	0	0	used as birth control pill, mimics estrogen
beauvericin	AATF	-	Homo	29203277	pollutant	0	0	depsipeptide with antibiotic and insecticidal isolated from the fungus Beauveria bassiana. It is also produced by several other fungi and may occur in grain
Dibutyl Phthalate	AATF	-	Rattus	21266533	industrial	0	0	plasticizer
Benzo(a)pyrene	AATF	+	Mus	22228805	pollutant	0	0	product of incomplete combustion of organic material
fipronil	AATF	+	Rattus	23962444	agricultural	0	0	moderately hazardous pesticide
Chlorodiphenyl (54% Chlorine)	AATF	-	Mus	23650126	industrial	pollutant	0	mix of PCBs, multiple applications
Cyclosporine	AATF	+	Homo	25562108	pharmaceutical	0	0	immune suppressant
sodium bichromate	AATF	+	Rattus	22561333	industrial	0	0	precursor for tunning solts of Cr
N-Methyl-3,4-methylenedioxyamphetamine	AATF	+	Mus	26251327	pharmaceutical	0	0	recreational drug
Tetrachlorodibenzodioxin	AATF	1	Mus	24058054	pollutant	0	0	product of incomplete combustion of organic material
Coal Ash	AATK	-	Homo	19000753	pollutant	0	0	is a coal combustion product that is composed of the particulates (fine particles of burned fuel) that are driven out of coal-fired boilers together with the flue gases.
Tetrachlorodibenzodioxin	AATK	1	Mus	28922406	pollutant	0	0	product of incomplete combustion of organic material
ferric oxide	AATK	+	Mus	25086211	industrial	0	0	feedstock of the steel and iron industries, multiple applications
Plant Extracts	AATK	-	Homo	23557933	pharmaceutical	0	0	various pharmaceutical
Smoke	AATK	1	Mus	23693141	pollutant	0	0	result of combustion of organic material
benzo(b)fluoranthene	AATK	+	Mus	26377693	industrial	pollutant	0	byproduct of combustion of organic material
titanium dioxide	AATK	+	Mus	23557971	food component	cosmetics	industrial	pigments, sunscreen and other
jinfukang	AATK	+	Homo	27392435	pharmaceutical	0	0	Chinese herbal medicine with potential immunopotentiation activity
Clofibrate	AATK	-	Mus	17585979	pharmaceutical	0	0	controlling the high cholesterol and triacylglyceride
troglitazone	AATK	+	Mus	28973697	pharmaceutical	0	0	antidiabetic and anti-inflammatory drug
Aflatoxin B1	AATK	-	Homo	21641981	pollutant	0	0	fungal toxin
Dronabinol	AATK	-	Mus	12237329	pharmaceutical	0	0	control of nausea and vomiting
bisphenol A	AATK	1	Rattus	25181051	industrial	0	0	monomer of polycarbonate plastic
Propylthiouracil	AATK	-	Rattus	25825206	pharmaceutical	0	0	antithyroid
(+)-JQ1 compound	AATK	-	Homo	26752646	research	0	0	BET bromodomain inhibitor
Estradiol	AATK	-	Mus	19484750	pharmaceutical	endobiotic	0	female reproductive hoormone
Soot	AATK	-	Mus	26551751	pollutant	0	0	air pollutant
Tretinoin	AATK	-	Homo	23724009	pharmaceutical	0	0	treatment of acne and acute promyelocytic leukemia
GSK-J4	AATK	-	Homo	29301935	research	0	0	jumonji H3K27 demethylase inhibitor
tesaglitazar	AATK	+	Rattus	21515302	pharmaceutical	0	0	dual peroxisome proliferator-activated receptor agonist with affinity to PPARα and PPARγ, proposed for the management of type 2 diabetes
Copper	AATK	+	Rattus	26033743	industrial	0	0	multiple applications
benz(a)anthracene	AATK	+	Mus	26377693	pollutant	0	0	product of incomplete combustion of organic material
Silicon Dioxide	AATK	-	Homo	25895662	industrial	0	0	multiple industrial applications
Thioacetamide	AATK	-	Rattus	23411599	research	0	0	source of sulfide ions
Dietary Fats	AATK	-	Mus	22609946	food component	0	0	food
benzo(k)fluoranthene	AATK	+	Mus	26377693	pollutant	0	0	product of incomplete combustion of organic material
Dietary Sucrose	AATK	+	Rattus	26033743	food component	0	0	food
Benzo(a)pyrene	AATK	-	Homo	26238291	pollutant	0	0	product of incomplete combustion of organic material
tris(1,3-dichloro-2-propyl)phosphate	AATK	1	Homo	26179874	industrial	0	0	Flame retardant
Urethane	AATK	-	Homo	28818685	food component	pharmaceutical	0	present in alcohol beverages, used as an antineoplastic agent
Tetrachlorodibenzodioxin	AB124611	1	Mus	28922406	pollutant	0	0	product of incomplete combustion of organic material
Chloroprene	AB124611	-	Mus	23125180	industrial	0	0	production of neoprene
Tetrachlorodibenzodioxin	AB124611	1	Mus	21570461	pollutant	0	0	product of incomplete combustion of organic material
Acetaminophen	ABAT	+	Homo	25704631	pharmaceutical	0	0	painkiller
Silver	ABAT	-	Mus	27131904	industrial	0	0	many applications
Valproic Acid	ABAT	+	Homo	28001369	pharmaceutical	0	0	treatment of epilepsy, bipolar disorder and migraine headaches
Benzo(a)pyrene	ABAT	-	Homo	21632981	pollutant	0	0	product of incomplete combustion of organic material
Aflatoxin B1	ABAT	-	Homo	22100608	pollutant	0	0	fungal toxin
Ethinyl Estradiol	ABAT	1	Homo	20170705	pharmaceutical	0	0	used as birth control pill, mimics estrogen
GSK-J4	ABAT	-	Homo	29301935	research	0	0	jumonji H3K27 demethylase inhibitor
rosiglitazone	ABAT	-	Homo	25572481	pharmaceutical	0	0	It works as an insulin sensitizer, by binding to the PPAR in fat cells and making the cells more responsive to insulin
Clofibrate	ABAT	-	Rattus	12851107	pharmaceutical	0	0	controlling the high cholesterol and triacylglyceride
1-(2-trifluoromethoxyphenyl)-2-nitroethanone	ABAT	-	Rattus	22527513	research	0	0	used as hepatotoxin in research
Valproic Acid	ABAT	+	Homo	26272509	pharmaceutical	0	0	treatment of epilepsy, bipolar disorder and migraine headaches
Thioacetamide	ABAT	-	Rattus	23411599	research	0	0	source of sulfide ions
Propylthiouracil	ABAT	-	Rattus	24780913	pharmaceutical	0	0	antithyroid
sodium bichromate	ABAT	-	Rattus	25993096	industrial	0	0	precursor for tunning solts of Cr
tesaglitazar	ABAT	-	Rattus	21515302	pharmaceutical	0	0	dual peroxisome proliferator-activated receptor agonist with affinity to PPARα and PPARγ, proposed for the management of type 2 diabetes
Carbon Tetrachloride	ABAT	-	Mus	27339419	industrial	0	0	cleaning and other
vinylidene chloride	ABAT	-	Mus	26682919	industrial	0	0	coating to other plastic films to increase their barrier properties
4,4'-diaminodiphenylmethane	ABAT	-	Mus	18648102	industrial	0	0	precursor to polyurethanes
Acetaminophen	ABAT	+	Mus	21329376	pharmaceutical	0	0	painkiller
Nanotubes, Carbon	ABAT	-	Mus	25554681	industrial	0	0	multiple industrial applications
rosiglitazone	ABAT	-	Rattus	21515302	pharmaceutical	0	0	It works as an insulin sensitizer, by binding to the PPAR in fat cells and making the cells more responsive to insulin
pirinixic acid	ABAT	-	Rattus	17164430	research	0	0	peroxisome proliferator-activated receptor alpha (PPARa) agonist
N-Methyl-3,4-methylenedioxyamphetamine	ABAT	+	Mus	20188158	pharmaceutical	0	0	recreational drug
Benzo(a)pyrene	ABAT	-	Homo	26238291	pollutant	0	0	product of incomplete combustion of organic material
Aflatoxin B1	ABAT	1	Homo	20106945	pollutant	0	0	fungal toxin
1-Naphthylisothiocyanate	ABAT	+	Rattus	25380136	research	0	0	a tool to study the pathogenesis of chemically induced cholestasis,
Fenretinide	ABAT	-	Mus	28973697	pharmaceutical	0	0	treatment of cancer
Cyclosporine	ABAT	-	Homo	23830897	pharmaceutical	0	0	immune suppressant
Cyclosporine	ABAT	-	Homo	25562108	pharmaceutical	0	0	immune suppressant
Tetrachlorodibenzodioxin	ABAT	-	Rattus	20959002	pollutant	0	0	product of incomplete combustion of organic material
Copper Sulfate	ABAT	+	Homo	19549813	agricultural	0	0	fungicide and herbicide, niche uses
perfluorooctanoic acid	ABAT	+	Homo	26879310	industrial	0	0	surfactant
Endosulfan	ABAT	-	Rattus	29391264	agricultural	0	0	organochlorine insecticide
butyraldehyde	ABAT	+	Homo	26079696	industrial	0	0	intermediate in chemical industry
Cyclosporine	ABAT	-	Homo	27989131	pharmaceutical	0	0	immune suppressant
Coumestrol	ABAT	+	Homo	19167446	food component	0	0	natural organic present in vegetables, estrogenic activity
troglitazone	ABAT	-	Rattus	21515302	pharmaceutical	0	0	antidiabetic and anti-inflammatory drug
Glafenine	ABAT	-	Rattus	24136188	pharmaceutical	0	0	nonsteroidal anti-inflammatory drug
Ammonium Chloride	ABAT	1	Rattus	16483693	agricultural	0	0	fertilizer
entinostat	ABAT	+	Homo	26272509	pharmaceutical	0	0	histone deacetylase inhibitor
Potassium Dichromate	ABAT	-	Mus	23608068	industrial	0	0	used as cleaning agent, as cenment component and in photography
Benzo(a)pyrene	ABAT	+	Mus	22228805	pollutant	0	0	product of incomplete combustion of organic material
pentanal	ABAT	+	Homo	26079696	food component	0	0	fruit flavors
bisphenol A	ABAT	1	Homo	20170705	industrial	0	0	monomer of polycarbonate plastic
Dibutyl Phthalate	ABAT	-	Mus	21266533	industrial	0	0	plasticizer
Valproic Acid	ABAT	+	Homo	23179753	pharmaceutical	0	0	treatment of epilepsy, bipolar disorder and migraine headaches
trichostatin A	ABAT	+	Homo	24935251	pharmaceutical	research	0	inhibits the class I and II mammalian histone deacetylase (HDAC)
Genistein	ABAT	-	Homo	20884965	food component	0	0	Genistein is an isoflavone that is described as an angiogenesis inhibitor and a phytoestrogen.
perfluorooctane sulfonic acid	ABAT	-	Mus	26178269	industrial	pollutant	0	multiple uses as fluorosurfactant
perfluorooctanoic acid	ABAT	-	Rattus	19162173	industrial	0	0	surfactant
Phenylmercuric Acetate	ABAT	+	Homo	26272509	agricultural	industrial	0	antifungal activity in agriculture and in leather processing
Aldehydes	ABAT	+	Homo	25014914	industrial	0	0	multiple applications
Cisplatin	ABAT	-	Homo	27392435	pharmaceutical	0	0	chemotherapy medication
Valproic Acid	ABAT	+	Homo	27188386	pharmaceutical	0	0	treatment of epilepsy, bipolar disorder and migraine headaches
nimesulide	ABAT	-	Rattus	24136188	pharmaceutical	0	0	nonsteroidal anti-inflammatory drug
Aflatoxin B1	ABAT	-	Mus	19770486	pollutant	0	0	fungal toxin
trichostatin A	ABAT	+	Homo	26272509	pharmaceutical	research	0	inhibits the class I and II mammalian histone deacetylase (HDAC)
Vancomycin	ABAT	+	Mus	18930951	pharmaceutical	0	0	antibiotic
Cyclosporine	ABAT	-	Homo	20106945	pharmaceutical	0	0	immune suppressant
Phlorhizin	ABAT	-	Mus	22538082	food component	research	0	Phlorizin is a competitive inhibitor of SGLT1 and SGLT2 because it competes with D-glucose for binding to the carrier; this reduces renal glucose transport, lowering the amount of glucose in the blood, was studied as a potential pharmaceutical treatment for type 2 diabetes, found in unripe apples
alpha-Chlorohydrin	ABAT	+	Rattus	28522335	food component	0	0	created in foods during protein hydrolysis
Antirheumatic Agents	ABAT	-	Homo	24449571	pharmaceutical	0	0	antirheumatic agents
Tetrachlorodibenzodioxin	ABAT	-	Rattus	21215274	pollutant	0	0	product of incomplete combustion of organic material
2,4-dinitrotoluene	ABAT	1	Rattus	21346803	industrial	0	0	precursor to toluene diisocyanate
panobinostat	ABAT	+	Homo	26272509	pharmaceutical	0	0	Anticancer drug, histone deacetylase inhibitor
bisphenol A	ABAT	-	Rattus	25181051	industrial	0	0	monomer of polycarbonate plastic
Dimethylnitrosamine	ABAT	+	Rattus	25380136	pollutant	0	0	by-product of several industrial processes and present at very low levels in certain foodstuffs, especially those cooked, smoked, or cured
Pregnenolone Carbonitrile	ABAT	-	Rattus	19162173	research	0	0	Pregnenolone carbonitrile is a catatoxic steroid and microsomal enzyme inducer having significant effects on the induction of cytochrome P450. It has also demonstrated the potential for protective capability against acetaminophen-induced liver damage.
Lithium Chloride	ABAT	-	Homo	15711924	industrial	0	0	used for the production of lithium metal
Benzo(a)pyrene	ABAT	+	Mus	19770486	pollutant	0	0	product of incomplete combustion of organic material
2',3,3',4',5-pentachloro-4-hydroxybiphenyl	ABAT	-	Rattus	19114083	industrial	pollutant	0	metabolit of PCB126
Copper	ABAT	-	Rattus	22465980	industrial	0	0	multiple applications
propionaldehyde	ABAT	+	Homo	26079696	industrial	0	0	intermediate in chemical industry
Benzo(a)pyrene	ABAT	-	Homo	20064835	pollutant	0	0	product of incomplete combustion of organic material
ochratoxin A	ABAT	-	Rattus	18417182	pollutant	0	0	produced by bacteria in food
1-bromopropane	ABAT	-	Rattus	21925529	industrial	0	0	solvent
4,4'-diaminodiphenylmethane	ABAT	+	Rattus	25380136	industrial	0	0	precursor to polyurethanes
Aflatoxin B1	ABAT	-	Homo	27153756	pollutant	0	0	fungal toxin
Tetrachlorodibenzodioxin	ABAT	+	Mus	19770486	pollutant	0	0	product of incomplete combustion of organic material
nefazodone	ABAT	-	Rattus	24136188	pharmaceutical	0	0	antidepressant
Tretinoin	ABAT	+	Homo	21934132	pharmaceutical	0	0	treatment of acne and acute promyelocytic leukemia
leflunomide	ABAT	-	Homo	29427785	pharmaceutical	0	0	used in active moderate-to-severe rheumatoid arthritis and psoriatic arthritis
Ethinyl Estradiol	ABAT	-	Homo	18936297	pharmaceutical	0	0	used as birth control pill, mimics estrogen
Dexamethasone	ABAT	+	Homo	25047013	pharmaceutical	0	0	It is used in the treatment of many conditions, including rheumatic problems, a number of skin diseases, severe allergies, asthma, chronic obstructive lung disease, croup, brain swelling, and along with antibiotics in tuberculosis.
Cyclosporine	ABAT	-	Mus	23830897	pharmaceutical	0	0	immune suppressant
Acetaminophen	ABAT	-	Homo	29067470	pharmaceutical	0	0	painkiller
Valproic Acid	ABAT	+	Homo	19101580	pharmaceutical	0	0	treatment of epilepsy, bipolar disorder and migraine headaches
Benzo(a)pyrene	ABAT	-	Homo	20106945	pollutant	0	0	product of incomplete combustion of organic material
Valproic Acid	ABAT	+	Homo	24935251	pharmaceutical	0	0	treatment of epilepsy, bipolar disorder and migraine headaches
Valproic Acid	ABAT	+	Homo	24383497	pharmaceutical	0	0	treatment of epilepsy, bipolar disorder and migraine headaches
leflunomide	ABAT	-	Homo	28988120	pharmaceutical	0	0	used in active moderate-to-severe rheumatoid arthritis and psoriatic arthritis
bromfenacoum	ABAT	+	Rattus	28903499	pharmaceutical	0	0	NSAID
pirinixic acid	ABAT	-	Rattus	19162173	research	0	0	peroxisome proliferator-activated receptor alpha (PPARa) agonist
Sodium Selenite	ABCA1	+	Homo	24383545	food component	industrial	0	glass production, dietary supplements
benzo(b)fluoranthene	ABCA1	+	Mus	26377693	industrial	pollutant	0	byproduct of combustion of organic material
fenarimol	ABCA1	-	Rattus	28970091	agricultural	0	0	fungicide which acts against rusts, blackspot and mildew fungi
Niacin	ABCA1	+	Rattus	20303128	food component	pharmaceutical	0	Niacin (vitamin B-3) is often part of a daily multivitamin. Foods rich in niacin include yeast, milk, meat, tortillas and cereal grains.
Mifepristone	ABCA1	-	Rattus	25972201	pharmaceutical	0	0	synthetic steroid used for medical termination of intrauterine pregnancy
Acetaminophen	ABCA1	-	Homo	29067470	pharmaceutical	0	0	painkiller
3,4,5,3',4'-pentachlorobiphenyl	ABCA1	+	Homo	21703328	industrial	0	0	flame retardant
Aflatoxin B1	ABCA1	-	Homo	22100608	pollutant	0	0	fungal toxin
2,6-dinitrotoluene	ABCA1	1	Rattus	21346803	industrial	0	0	intermediate in production of polyuretane foams, plasticiser
Chlorodiphenyl (54% Chlorine)	ABCA1	-	Mus	25270620	industrial	pollutant	0	mix of PCBs, multiple applications
perfluorohexanesulfonic acid	ABCA1	-	Mus	21705711	industrial	pollutant	0	hydrophobic (water-repelling), and oleophobic (oil-repelling) coatings
pirinixic acid	ABCA1	+	Mus	18445702	research	0	0	peroxisome proliferator-activated receptor alpha (PPARa) agonist
Isoproterenol	ABCA1	+	Mus	20003209	pharmaceutical	0	0	used for heart disease
archazolid B	ABCA1	-	Homo	25218289	pharmaceutical	0	0	candidate drug, inhibitors of vacuolar type ATPases
(+)-JQ1 compound	ABCA1	-	Homo	25307878	research	0	0	BET bromodomain inhibitor
vinylidene chloride	ABCA1	+	Mus	26682919	industrial	0	0	coating to other plastic films to increase their barrier properties
Valproic Acid	ABCA1	1	Homo	25979313	pharmaceutical	0	0	treatment of epilepsy, bipolar disorder and migraine headaches
fenamidone	ABCA1	+	Mus	27029645	agricultural	0	0	Fenamidone is a foliar fungicide used on grapes, ornamentals, potatoes, tobacco, and vegetables such as tomatoes. It exerts its fungicidal effects by acting as a Qo inhibitor.
arsenic trioxide	ABCA1	-	Homo	20458559	pharmaceutical	industrial	0	chemotherapeutic agent (leukemia), industrial intermediate
3,4,5,3',4'-pentachlorobiphenyl	ABCA1	1	Homo	21703328	industrial	0	0	flame retardant
Silver	ABCA1	-	Mus	27131904	industrial	0	0	many applications
Valproic Acid	ABCA1	-	Homo	25716160	pharmaceutical	0	0	treatment of epilepsy, bipolar disorder and migraine headaches
Antirheumatic Agents	ABCA1	-	Homo	24449571	pharmaceutical	0	0	antirheumatic agents
4-vinyl-1-cyclohexene dioxide	ABCA1	1	Mus	20829426	industrial	0	0	crosslinking agent for the production of epoxy resins
1,2,5,6-dibenzanthracene	ABCA1	+	Mus	26377693	pollutant	0	0	PAH resulting from combustion of organic material
Phenylmercuric Acetate	ABCA1	+	Homo	26272509	agricultural	industrial	0	antifungal activity in agriculture and in leather processing
Rosuvastatin Calcium	ABCA1	-	Homo	18192897	pharmaceutical	0	0	used in combination with exercise, diet, and weight-loss to treat high cholesterol and related conditions, and to prevent cardiovascular disease
Thioacetamide	ABCA1	+	Rattus	26222700	research	0	0	source of sulfide ions
titanium dioxide	ABCA1	-	Mus	23557971	food component	cosmetics	industrial	pigments, sunscreen and other
Ammonium Chloride	ABCA1	1	Rattus	16483693	agricultural	0	0	fertilizer
Pyrazinamide	ABCA1	+	Rattus	22431067	pharmaceutical	0	0	Pyrazinamide is a medication used to treat tuberculosis.
Soman	ABCA1	+	Rattus	19281266	chemical warfare	0	0	chemical warfare
nickel monoxide	ABCA1	+	Rattus	19167457	industrial	0	0	used in batteries
Oxygen	ABCA1	-	Homo	24236059	environment	0	0	air component
trichostatin A	ABCA1	-	Homo	24935251	pharmaceutical	research	0	inhibits the class I and II mammalian histone deacetylase (HDAC)
flusilazole	ABCA1	-	Rattus	28263823	agricultural	0	0	organosilicon fungicide
Aflatoxin B1	ABCA1	1	Homo	20106945	pollutant	0	0	fungal toxin
Valproic Acid	ABCA1	-	Homo	24935251	pharmaceutical	0	0	treatment of epilepsy, bipolar disorder and migraine headaches
Estradiol	ABCA1	-	Homo	20106945	pharmaceutical	endobiotic	0	female reproductive hoormone
Valproic Acid	ABCA1	+	Mus	24489787	pharmaceutical	0	0	treatment of epilepsy, bipolar disorder and migraine headaches
Dasatinib	ABCA1	+	Homo	20579391	pharmaceutical	0	0	chemotherapy medication (leukemia)
quinocetone	ABCA1	+	Homo	27046791	agricultural	0	0	widely used in China for the prevention of bacterial infections and promoting animal growth
bisphenol A	ABCA1	-	Mus	25270620	industrial	0	0	monomer of polycarbonate plastic
Vancomycin	ABCA1	-	Mus	18930951	pharmaceutical	0	0	antibiotic
Acetaminophen	ABCA1	-	Homo	21420995	pharmaceutical	0	0	painkiller
MRK 003	ABCA1	+	Homo	21169257	pharmaceutical	0	0	drug candidate
N-Methyl-3,4-methylenedioxyamphetamine	ABCA1	-	Mus	20188158	pharmaceutical	0	0	recreational drug
Topotecan	ABCA1	+	Rattus	25729387	pharmaceutical	0	0	chemotherapeutic agent that is a topoisomerase inhibitor
bisphenol A	ABCA1	+	Rattus	18180321	industrial	0	0	monomer of polycarbonate plastic
Doxorubicin	ABCA1	+	Mus	15033991	pharmaceutical	0	0	chemotherapy medicine
Cyclosporine	ABCA1	-	Mus	19770486	pharmaceutical	0	0	immune suppressant
Chloroprene	ABCA1	+	Mus	23125180	industrial	0	0	production of neoprene
propiconazole	ABCA1	-	Rattus	28970091	agricultural	0	0	demethylation inhibiting fungicide
Lindane	ABCA1	+	Homo	24356939	agricultural	pharmaceutical	pollutant	agricultural insecticide and as a pharmaceutical treatment for lice and scabies
Fenretinide	ABCA1	+	Mus	28973697	pharmaceutical	0	0	treatment of cancer
Dexamethasone	ABCA1	+	Rattus	20032058	pharmaceutical	0	0	It is used in the treatment of many conditions, including rheumatic problems, a number of skin diseases, severe allergies, asthma, chronic obstructive lung disease, croup, brain swelling, and along with antibiotics in tuberculosis.
Silicon Dioxide	ABCA1	-	Homo	25351596	industrial	0	0	multiple industrial applications
Oxygen	ABCA1	+	Homo	26516004	environment	0	0	air component
Particulate Matter	ABCA1	+	Homo	22178795	pollutant	0	0	Air contaminants
nickel chloride	ABCA1	+	Homo	17312168	industrial	0	0	most important source of nickel
Benzo(a)pyrene	ABCA1	-	Homo	20106945	pollutant	0	0	product of incomplete combustion of organic material
Silicon Dioxide	ABCA1	+	Homo	23806026	industrial	0	0	multiple industrial applications
Heptachlor Epoxide	ABCA1	-	Mus	25270620	agricultural	0	0	insecticide
Nanotubes, Carbon	ABCA1	-	Mus	25554681	industrial	0	0	multiple industrial applications
Tetrachlorodibenzodioxin	ABCA1	-	Mus	28213091	pollutant	0	0	product of incomplete combustion of organic material
incobotulinumtoxinA	ABCA1	+	Homo	29522793	pharmaceutical	pollutant	0	botulinum toxin used to treat chronic sialorrhea, cervical dystonia, muscle stiffness an other.
Nanotubes, Carbon	ABCA1	-	Mus	25554681	industrial	0	0	multiple industrial applications
propionaldehyde	ABCA1	+	Homo	26079696	industrial	0	0	intermediate in chemical industry
Phenobarbital	ABCA1	-	Mus	25270620	pharmaceutical	0	0	treatment of epilepsy
Copper Sulfate	ABCA1	-	Homo	19549813	agricultural	0	0	fungicide and herbicide, niche uses
Benzo(a)pyrene	ABCA1	+	Mus	21569818	pollutant	0	0	product of incomplete combustion of organic material
Plant Oils	ABCA1	-	Homo	23370395	food component	0	0	food
Silicon Dioxide	ABCA1	-	Mus	19073995	industrial	0	0	multiple industrial applications
Acetazolamide	ABCA1	+	Mus	19274763	pharmaceutical	0	0	is a medication used to treat glaucoma, epilepsy, altitude sickness, periodic paralysis, idiopathic intracranial hypertension, and heart failure.
4-hydroxy-2-nonenal	ABCA1	-	Mus	19191707	food component	endobiotic	0	produced by lipid peroxidation in cells, in response to oxidative stress, may be components of food
Benzo(a)pyrene	ABCA1	-	Homo	21632981	pollutant	0	0	product of incomplete combustion of organic material
Cadmium Chloride	ABCA1	-	Mus	24982889	industrial	0	0	multiple industrial applications
Valproic Acid	ABCA1	+	Homo	27188386	pharmaceutical	0	0	treatment of epilepsy, bipolar disorder and migraine headaches
methylmercuric chloride	ABCA1	-	Homo	28001369	pollutant	0	0	naturally occuring or results from mining and other activities
Glafenine	ABCA1	+	Rattus	24136188	pharmaceutical	0	0	nonsteroidal anti-inflammatory drug
Testosterone	ABCA1	-	Mus	21669218	pharmaceutical	endobiotic	0	naturally occuring male hormone
Air Pollutants	ABCA1	-	Homo	21757418	pollutant	0	0	air pollutants
bis(tri-n-butyltin)oxide	ABCA1	+	Mus	25270620	agricultural	industrial	pollutant	Tributyltin oxide (TBTO) is an organotin compound chiefly used as a biocide (fungicide and molluscicide), especially a wood preservative
Benzo(a)pyrene	ABCA1	-	Homo	26238291	pollutant	0	0	product of incomplete combustion of organic material
obeticholic acid	ABCA1	-	Homo	27939613	pharmaceutical	0	0	It is used as a drug to treat primary biliary cholangitis
trimellitic anhydride	ABCA1	-	Mus	19042947	industrial	0	0	plasticizer
Carbamazepine	ABCA1	1	Homo	25979313	pharmaceutical	0	0	reatment of epilepsy and neuropathic pain
Triiodothyronine	ABCA1	+	Mus	25172293	pharmaceutical	endobiotic	0	thyroid hormone
Tacrolimus	ABCA1	+	Rattus	21865292	pharmaceutical	0	0	is an immunosuppressive drug used mainly after allogeneic organ transplant to lower the risk of organ rejection
Simvastatin	ABCA1	-	Rattus	25055962	pharmaceutical	0	0	used to decrease elevated lipid
oxaliplatin	ABCA1	+	Rattus	25729387	pharmaceutical	0	0	treatment of colorectal cancer
4,4'-hexafluorisopropylidene diphenol	ABCA1	+	Rattus	27567155	industrial	0	0	rubber plasticizer
Cuprizone	ABCA1	+	Rattus	26577399	research	0	0	demyelination agent
bisphenol A	ABCA1	+	Rattus	25181051	industrial	0	0	monomer of polycarbonate plastic
vorinostat	ABCA1	-	Homo	27188386	pharmaceutical	0	0	inhibit histone deacetylases (HDAC)
bis(tri-n-butyltin)oxide	ABCA1	+	Homo	24356939	agricultural	industrial	pollutant	Tributyltin oxide (TBTO) is an organotin compound chiefly used as a biocide (fungicide and molluscicide), especially a wood preservative
Tetrachlorodibenzodioxin	ABCA1	-	Rattus	26232522	pollutant	0	0	product of incomplete combustion of organic material
Phenobarbital	ABCA1	1	Mus	23091169	pharmaceutical	0	0	treatment of epilepsy
Benzo(a)pyrene	ABCA1	-	Mus	19770486	pollutant	0	0	product of incomplete combustion of organic material
Methylmercury Compounds	ABCA1	1	Homo	23920476	pollutant	0	0	It is the major source of organic mercury for all humans. It is a bioaccumulative environmental toxicant
Tetrachloroethylene	ABCA1	+	Mus	28973375	industrial	0	0	solvent
pyrachlostrobin	ABCA1	+	Mus	27029645	agricultural	0	0	fungicide
nimesulide	ABCA1	-	Rattus	24136188	pharmaceutical	0	0	nonsteroidal anti-inflammatory drug
perfluorooctane sulfonic acid	ABCA1	-	Homo	27153767	industrial	pollutant	0	multiple uses as fluorosurfactant
Methotrexate	ABCA1	+	Homo	24657277	pharmaceutical	0	0	treat cancer
Valproic Acid	ABCA1	-	Homo	23179753	pharmaceutical	0	0	treatment of epilepsy, bipolar disorder and migraine headaches
tributyltin	ABCA1	+	Homo	24356939	pollutant	0	0	anti-fouling paint
Cuprizone	ABCA1	+	Rattus	27523638	research	0	0	demyelination agent
Tetrachlorodibenzodioxin	ABCA1	1	Mus	21570461	pollutant	0	0	product of incomplete combustion of organic material
Cyclosporine	ABCA1	+	Rattus	21865292	pharmaceutical	0	0	immune suppressant
Tetrachlorodibenzodioxin	ABCA1	-	Rattus	21215274	pollutant	0	0	product of incomplete combustion of organic material
Cyclosporine	ABCA1	-	Homo	25562108	pharmaceutical	0	0	immune suppressant
flusilazole	ABCA1	-	Rattus	22664269	agricultural	0	0	organosilicon fungicide
Tetrachlorodibenzodioxin	ABCA1	1	Mus	26377647	pollutant	0	0	product of incomplete combustion of organic material
pantogab	ABCA1	+	Mus	17379144	pharmaceutical	0	0	drug for neurological, psychological and psychiatric conditions
Zinc	ABCA1	+	Homo	22171008	industrial	0	0	multiple industrial applications
(+)-JQ1 compound	ABCA1	-	Homo	26752646	research	0	0	BET bromodomain inhibitor
Methylcholanthrene	ABCA1	-	Mus	20713471	pollutant	research	0	produced by burning organic compounds at very high temperatures, model carcinogen
difenoconazole	ABCA1	-	Rattus	28263823	agricultural	0	0	fungicide used to treat seeds
Silicon Dioxide	ABCA1	+	Mus	23221170	industrial	0	0	multiple industrial applications
Quercetin	ABCA1	-	Homo	21632981	food component	0	0	food additive
Sirolimus	ABCA1	+	Rattus	21865292	pharmaceutical	research	0	prevention of organ transplant rejection and for the treatment of lymphangioleiomyomatosis
Ketamine	ABCA1	+	Rattus	20080153	pharmaceutical	0	0	sedative for anestheisa
Mercury	ABCA1	1	Homo	23920476	industrial	0	0	multiple applications
2,4-dinitrotoluene	ABCA1	1	Rattus	21346803	industrial	0	0	precursor to toluene diisocyanate
beta-hexachlorocyclohexane	ABCA1	-	Mus	25270620	pollutant	0	0	byproduct of the production of the insecticide lindane
Buspirone	ABCA1	+	Rattus	24136188	pharmaceutical	0	0	anxiolytic drug
titanium dioxide	ABCA1	-	Mus	27760801	food component	cosmetics	industrial	pigments, sunscreen and other
Cyclosporine	ABCA1	-	Homo	20106945	pharmaceutical	0	0	immune suppressant
Tretinoin	ABCA1	+	Homo	23724009	pharmaceutical	0	0	treatment of acne and acute promyelocytic leukemia
NSC305787	ABCA1	+	Homo	27137931	pharmaceutical	0	0	candidate drug
(+)-JQ1 compound	ABCA10	-	Homo	26752646	research	0	0	BET bromodomain inhibitor
Oxygen	ABCA10	+	Homo	26516004	environment	0	0	air component
sodium arsenite	ABCA10	1	Homo	29319823	agricultural	industrial	0	primarily used as a pesticide, but has other uses such as hide preservative, antiseptic, dyeing, and soaps
Antirheumatic Agents	ABCA11P	+	Homo	24449571	pharmaceutical	0	0	antirheumatic agents
tris(1,3-dichloro-2-propyl)phosphate	ABCA11P	+	Homo	26179874	industrial	0	0	Flame retardant
ICG 001	ABCA11P	-	Homo	26191083	research	0	0	target Wnt-b signalling
dicrotophos	ABCA11P	-	Homo	28302478	agricultural	0	0	insecticide
Formaldehyde	ABCA11P	-	Homo	20655997	industrial	research	cosmetics	multiple applications
1,1,1-trichloroethane	ABCA12	+	Mus	25270620	industrial	0	0	solvent
Acetaminophen	ABCA12	-	Homo	29067470	pharmaceutical	0	0	painkiller
mono-(2-ethylhexyl)phthalate	ABCA12	+	Mus	22401849	pollutant	0	0	metabolite of di(2-ehtylhexyl)phthalate (DEHP), - industrial plasticeser
Sodium Dodecyl Sulfate	ABCA12	+	Homo	25377654	food component	industrial	0	SDS is a common component of many domestic cleaning, personal hygiene and cosmetic, pharmaceutical, and food products, as well as of industrial and commercial cleaning and product formulations
Benzo(a)pyrene	ABCA12	+	Homo	21632981	pollutant	0	0	product of incomplete combustion of organic material
Cyclosporine	ABCA12	+	Homo	20106945	pharmaceutical	0	0	immune suppressant
Formaldehyde	ABCA12	+	Homo	23649840	industrial	research	cosmetics	multiple applications
Estradiol	ABCA12	-	Homo	21185374	pharmaceutical	endobiotic	0	female reproductive hoormone
Quercetin	ABCA12	+	Homo	21632981	food component	0	0	food additive
Aflatoxin B1	ABCA12	+	Homo	22100608	pollutant	0	0	fungal toxin
Tetrachlorodibenzodioxin	ABCA12	-	Homo	19619570	pollutant	0	0	product of incomplete combustion of organic material
Demecolcine	ABCA12	+	Homo	23649840	pharmaceutical	research	0	used in chemotherapy
bisphenol A	ABCA12	-	Homo	22576693	industrial	0	0	monomer of polycarbonate plastic
zoledronic acid	ABCA12	+	Homo	24714768	pharmaceutical	0	0	bone deseases treatment
jinfukang	ABCA12	-	Homo	27392435	pharmaceutical	0	0	Chinese herbal medicine with potential immunopotentiation activity
Lucanthone	ABCA12	+	Homo	21148553	pharmaceutical	0	0	Lucanthone is a drug used in chemotherapy. It is a prodrug and is converted to the active metabolite hycanthone
bisphenol A	ABCA12	-	Rattus	25181051	industrial	0	0	monomer of polycarbonate plastic
butyraldehyde	ABCA12	-	Homo	26079696	industrial	0	0	intermediate in chemical industry
Benzo(a)pyrene	ABCA12	+	Homo	22316170	pollutant	0	0	product of incomplete combustion of organic material
benzo(k)fluoranthene	ABCA12	-	Mus	26377693	pollutant	0	0	product of incomplete combustion of organic material
arsenite	ABCA12	+	Homo	23974009	industrial	pollutant	0	Some species of bacteria obtain their energy by oxidizing various fuels while reducing arsenates to form arsenites
Tetrachlorodibenzodioxin	ABCA12	-	Homo	20106945	pollutant	0	0	product of incomplete combustion of organic material
Tretinoin	ABCA12	-	Homo	23724009	pharmaceutical	0	0	treatment of acne and acute promyelocytic leukemia
Estradiol	ABCA12	-	Homo	19619570	pharmaceutical	endobiotic	0	female reproductive hoormone
Testosterone	ABCA12	-	Homo	21592394	pharmaceutical	endobiotic	0	naturally occuring male hormone
Ethyl Methanesulfonate	ABCA12	+	Homo	23649840	research	0	0	mutagen
Tetrachlorodibenzodioxin	ABCA12	+	Homo	23152189	pollutant	0	0	product of incomplete combustion of organic material
Potassium Dichromate	ABCA12	-	Mus	23608068	industrial	0	0	used as cleaning agent, as cenment component and in photography
Cisplatin	ABCA12	+	Homo	27392435	pharmaceutical	0	0	chemotherapy medication
Atrazine	ABCA12	+	Homo	22378314	agricultural	0	0	herbicide
Air Pollutants	ABCA12	-	Homo	21757418	pollutant	0	0	air pollutants
Calcitriol	ABCA12	-	Homo	21592394	pharmaceutical	0	0	vitamin D3
Benzo(a)pyrene	ABCA12	+	Homo	20106945	pollutant	0	0	product of incomplete combustion of organic material
Methyl Methanesulfonate	ABCA12	+	Homo	23649840	pharmaceutical	0	0	cancer terapy, alkylating agent
Benzalkonium Compounds	ABCA12	+	Homo	25377654	industrial	pharmaceutical	0	biocide surfactants, preservative in eye drops
Vincristine	ABCA12	+	Homo	23649840	pharmaceutical	0	0	chemotherapy
Aflatoxin B1	ABCA12	1	Homo	20106945	pollutant	0	0	fungal toxin
Valproic Acid	ABCA13	+	Homo	23179753	pharmaceutical	0	0	treatment of epilepsy, bipolar disorder and migraine headaches
Phenylmercuric Acetate	ABCA13	+	Homo	26272509	agricultural	industrial	0	antifungal activity in agriculture and in leather processing
Vancomycin	ABCA13	+	Mus	18930951	pharmaceutical	0	0	antibiotic
Benzo(a)pyrene	ABCA13	-	Homo	22316170	pollutant	0	0	product of incomplete combustion of organic material
Potassium Dichromate	ABCA13	-	Mus	23608068	industrial	0	0	used as cleaning agent, as cenment component and in photography
Nickel	ABCA13	-	Homo	24768652	industrial	0	0	multiple industrial applications
Valproic Acid	ABCA13	+	Homo	24383497	pharmaceutical	0	0	treatment of epilepsy, bipolar disorder and migraine headaches
Dichloroacetic Acid	ABCA13	+	Mus	28962523	pharmaceutical	cosmetics	0	used for cosmetic treatments (such as chemical peels and tattoo removal) and as topical medication for the chemoablation of warts, including genital warts
Valproic Acid	ABCA13	+	Homo	26272509	pharmaceutical	0	0	treatment of epilepsy, bipolar disorder and migraine headaches
titanium dioxide	ABCA13	+	Mus	23557971	food component	cosmetics	industrial	pigments, sunscreen and other
trichostatin A	ABCA13	+	Homo	24935251	pharmaceutical	research	0	inhibits the class I and II mammalian histone deacetylase (HDAC)
vinylidene chloride	ABCA13	-	Mus	26682919	industrial	0	0	coating to other plastic films to increase their barrier properties
Valproic Acid	ABCA13	+	Homo	28001369	pharmaceutical	0	0	treatment of epilepsy, bipolar disorder and migraine headaches
Cisplatin	ABCA13	+	Homo	27392435	pharmaceutical	0	0	chemotherapy medication
NSC 689534	ABCA13	+	Homo	20971185	pharmaceutical	0	0	candidate anticancer drug
Sodium Fluoride	ABCA14	-	Mus	27862939	food component	industrial	agricultural	added to drinking water to maintain dental health, used as cleaning agent, in chemical synthesis and metallurgy and as insecticide
Potassium Dichromate	ABCA14	-	Mus	23608068	industrial	0	0	used as cleaning agent, as cenment component and in photography
Asbestos, Crocidolite	ABCA14	+	Mus	19446018	industrial	0	0	was commonly used to insulate steam engines, and it was also used in some spray-on coatings, pipe insulation, plastics and cement products.
bisphenol A	ABCA15	-	Rattus	25181051	industrial	0	0	monomer of polycarbonate plastic
bisphenol A	ABCA16	-	Rattus	25181051	industrial	0	0	monomer of polycarbonate plastic
Cuprizone	ABCA16	-	Rattus	26577399	research	0	0	demyelination agent
bisphenol A	ABCA17	1	Rattus	25181051	industrial	0	0	monomer of polycarbonate plastic
1,3-butadiene	ABCA17	-	Mus	29038090	industrial	0	0	monomer in the production of synthetic rubber
[truncated: 639,518+ more rows]

## Sheet: Table S1
Table S1. GSEA enrichment of Hallmark, KEGG and Reactome datasets with genes sensitive to chemical exposures.
COLLECTION OF GENE SETS	GENE SET NAME	GENE SET SIZE	ENRICHMENT SCORE	NORMALIZED ENRICHMENT SCORE	NOM p-val	FDR q-val
HALLMARK	TNFA SIGNALING VIA NFKB	198	0.882881	3.47735	0	0
HALLMARK	APOPTOSIS	161	0.866075	3.41528	0	0
HALLMARK	MTORC1 SIGNALING	200	0.837696	3.32005	0	0
HALLMARK	HYPOXIA	197	0.847522	3.29807	0	0
HALLMARK	EPITHELIAL MESENCHYMAL TRANSITION	198	0.833704	3.29282	0	0
HALLMARK	P53 PATHWAY	200	0.824836	3.26531	0	0
HALLMARK	XENOBIOTIC METABOLISM	200	0.834438	3.26078	0	0
HALLMARK	E2F TARGETS	200	0.80404	3.20631	0	0
HALLMARK	G2M CHECKPOINT	198	0.794107	3.13987	0	0
HALLMARK	UV RESPONSE UP	158	0.804093	3.13382	0	0
HALLMARK	FATTY ACID METABOLISM	158	0.806911	3.13065	0	0
HALLMARK	CHOLESTEROL HOMEOSTASIS	74	0.878061	3.11827	0	0
HALLMARK	UV RESPONSE DN	141	0.806721	3.1154	0	0
HALLMARK	ESTROGEN RESPONSE EARLY	198	0.790087	3.11211	0	0
HALLMARK	INTERFERON GAMMA RESPONSE	199	0.783601	3.08645	0	0
HALLMARK	ESTROGEN RESPONSE LATE	198	0.780884	3.08145	0	0
HALLMARK	GLYCOLYSIS	198	0.783157	3.07528	0	0
HALLMARK	INFLAMMATORY RESPONSE	200	0.78275	3.05066	0	0
HALLMARK	ADIPOGENESIS	199	0.77789	3.04992	0	0
HALLMARK	IL2 STAT5 SIGNALING	200	0.773132	3.02999	0	0
HALLMARK	KRAS SIGNALING UP	200	0.762296	3.02142	0	0
HALLMARK	COMPLEMENT	199	0.766431	3.01893	0	0
HALLMARK	COAGULATION	138	0.777258	3.00765	0	0
HALLMARK	BILE ACID METABOLISM	112	0.804075	3.00658	0	0
HALLMARK	ANDROGEN RESPONSE	99	0.795351	2.99174	0	0
HALLMARK	IL6 JAK STAT3 SIGNALING	86	0.819999	2.97052	0	0
HALLMARK	PEROXISOME	104	0.793063	2.96894	0	0
HALLMARK	ALLOGRAFT REJECTION	200	0.739064	2.94927	0	0
HALLMARK	INTERFERON ALPHA RESPONSE	96	0.789254	2.94671	0	0
HALLMARK	MYOGENESIS	200	0.742298	2.92848	0	0
HALLMARK	UNFOLDED PROTEIN RESPONSE	112	0.77435	2.91149	0	0
HALLMARK	MYC TARGETS V1	199	0.735355	2.88167	0	0
HALLMARK	PI3K AKT MTOR SIGNALING	105	0.755529	2.85511	0	0
HALLMARK	REACTIVE OXYGEN SPECIES PATHWAY	49	0.842619	2.83995	0	0
HALLMARK	MITOTIC SPINDLE	198	0.712263	2.8053	0	0
HALLMARK	HEME METABOLISM	198	0.706848	2.78843	0	0
HALLMARK	APICAL JUNCTION	200	0.69673	2.71495	0	0
HALLMARK	ANGIOGENESIS	36	0.858186	2.70938	0	0
HALLMARK	OXIDATIVE PHOSPHORYLATION	200	0.68515	2.69906	0	0
HALLMARK	TGF BETA SIGNALING	54	0.786524	2.6607	0	0
HALLMARK	MYC TARGETS V2	58	0.757084	2.58669	0	0
HALLMARK	DNA REPAIR	149	0.632538	2.46143	0	0
HALLMARK	WNT BETA CATENIN SIGNALING	42	0.732759	2.40347	0	0
HALLMARK	PROTEIN SECRETION	96	0.644215	2.39268	0	0
HALLMARK	APICAL SURFACE	44	0.717378	2.38043	0	0
HALLMARK	NOTCH SIGNALING	32	0.75879	2.35176	0	0
HALLMARK	HEDGEHOG SIGNALING	36	0.750122	2.31176	0	0
HALLMARK	SPERMATOGENESIS	135	0.567314	2.15636	0	0
HALLMARK	KRAS SIGNALING DN	200	0.539129	2.12198	0	0
HALLMARK	PANCREAS BETA CELLS	39	0.578207	1.85216	0.00125156	0.000320956
KEGG	TASTE TRANSDUCTION	50	-0.200996	-0.936118	0.596386	0.560772
KEGG	P53 SIGNALING PATHWAY	68	0.876217	3.0887	0	0
KEGG	CELL CYCLE	124	0.802539	3.08488	0	0
KEGG	PATHWAYS IN CANCER	325	0.766676	3.07627	0	0
KEGG	PPAR SIGNALING PATHWAY	69	0.843334	2.99201	0	0
KEGG	FOCAL ADHESION	199	0.753855	2.96595	0	0
KEGG	GLUTATHIONE METABOLISM	50	0.866996	2.94915	0	0
KEGG	PROSTATE CANCER	89	0.792057	2.90526	0	0
KEGG	MAPK SIGNALING PATHWAY	267	0.724973	2.90404	0	0
KEGG	SMALL CELL LUNG CANCER	84	0.792802	2.89771	0	0
KEGG	ECM RECEPTOR INTERACTION	84	0.778626	2.85326	0	0
KEGG	PEROXISOME	78	0.791514	2.85095	0	0
KEGG	COMPLEMENT AND COAGULATION CASCADES	69	0.801354	2.84104	0	0
KEGG	METABOLISM OF XENOBIOTICS BY CYTOCHROME P450	70	0.805113	2.81198	0	0
KEGG	PANCREATIC CANCER	70	0.789039	2.78118	0	0
KEGG	DRUG METABOLISM CYTOCHROME P450	72	0.783351	2.78093	0	0
KEGG	MELANOMA	71	0.783067	2.77985	0	0
KEGG	GLIOMA	65	0.777256	2.75712	0	0
KEGG	ADIPOCYTOKINE SIGNALING PATHWAY	66	0.785381	2.75308	0	0
KEGG	FATTY ACID METABOLISM	42	0.835456	2.75305	0	0
KEGG	CHRONIC MYELOID LEUKEMIA	73	0.775713	2.74811	0	0
KEGG	NOD LIKE RECEPTOR SIGNALING PATHWAY	62	0.785728	2.73998	0	0
KEGG	ARGININE AND PROLINE METABOLISM	54	0.794335	2.73961	0	0
KEGG	COLORECTAL CANCER	62	0.78915	2.73558	0	0
KEGG	ERBB SIGNALING PATHWAY	87	0.748599	2.73115	0	0
KEGG	CHEMOKINE SIGNALING PATHWAY	186	0.690974	2.72466	0	0
KEGG	BLADDER CANCER	42	0.831169	2.72007	0	0
KEGG	NEUROTROPHIN SIGNALING PATHWAY	126	0.71644	2.71774	0	0
KEGG	GLYCOLYSIS GLUCONEOGENESIS	61	0.784359	2.71281	0	0
KEGG	TOLL LIKE RECEPTOR SIGNALING PATHWAY	101	0.723812	2.71168	0	0
KEGG	APOPTOSIS	87	0.746681	2.7087	0	0
KEGG	CYTOKINE CYTOKINE RECEPTOR INTERACTION	261	0.685902	2.70536	0	0
KEGG	VALINE LEUCINE AND ISOLEUCINE DEGRADATION	43	0.814414	2.70515	0	0
KEGG	TRYPTOPHAN METABOLISM	40	0.827823	2.69205	0	0
KEGG	AXON GUIDANCE	129	0.6921	2.68942	0	0
KEGG	TGF BETA SIGNALING PATHWAY	85	0.732744	2.68634	0	0
KEGG	RENAL CELL CARCINOMA	70	0.75275	2.67876	0	0
KEGG	LEISHMANIA INFECTION	72	0.747794	2.67533	0	0
KEGG	NON SMALL CELL LUNG CANCER	54	0.781941	2.66424	0	0
KEGG	PROGESTERONE MEDIATED OOCYTE MATURATION	85	0.729003	2.66305	0	0
KEGG	ADHERENS JUNCTION	73	0.739464	2.64869	0	0
KEGG	PRION DISEASES	35	0.843527	2.64825	0	0
KEGG	GAP JUNCTION	90	0.708887	2.64554	0	0
KEGG	INSULIN SIGNALING PATHWAY	136	0.692475	2.63924	0	0
KEGG	WNT SIGNALING PATHWAY	150	0.684647	2.63846	0	0
KEGG	T CELL RECEPTOR SIGNALING PATHWAY	108	0.705452	2.63584	0	0
KEGG	REGULATION OF ACTIN CYTOSKELETON	213	0.664703	2.6292	0	0
KEGG	PATHOGENIC ESCHERICHIA COLI INFECTION	56	0.760531	2.62628	0	0
KEGG	HYPERTROPHIC CARDIOMYOPATHY HCM	83	0.728057	2.62344	0	0
KEGG	ACUTE MYELOID LEUKEMIA	57	0.755281	2.62087	0	0
KEGG	B CELL RECEPTOR SIGNALING PATHWAY	75	0.735342	2.62014	0	0
KEGG	DILATED CARDIOMYOPATHY	90	0.71501	2.61504	0	0
KEGG	BUTANOATE METABOLISM	34	0.815717	2.59739	0	0
KEGG	HEMATOPOIETIC CELL LINEAGE	87	0.706502	2.5866	0	0
KEGG	OOCYTE MEIOSIS	112	0.689574	2.58614	0	0
KEGG	ENDOMETRIAL CANCER	52	0.76047	2.57898	0	0
KEGG	ENDOCYTOSIS	180	0.657484	2.57867	0	0
KEGG	LEUKOCYTE TRANSENDOTHELIAL MIGRATION	116	0.691194	2.56115	0	0
KEGG	TIGHT JUNCTION	132	0.656058	2.55408	0	0
KEGG	EPITHELIAL CELL SIGNALING IN HELICOBACTER PYLORI INFECTION	68	0.734341	2.55233	0	0
KEGG	GLYCINE SERINE AND THREONINE METABOLISM	31	0.827631	2.5492	0	0
KEGG	VEGF SIGNALING PATHWAY	76	0.70938	2.53793	0	0
KEGG	GNRH SIGNALING PATHWAY	101	0.675777	2.52537	0	0
KEGG	AMYOTROPHIC LATERAL SCLEROSIS ALS	53	0.746946	2.52447	0	0
KEGG	FC GAMMA R MEDIATED PHAGOCYTOSIS	96	0.678339	2.51971	0	0
KEGG	AMINO SUGAR AND NUCLEOTIDE SUGAR METABOLISM	43	0.756564	2.51573	0	0
KEGG	ARACHIDONIC ACID METABOLISM	58	0.729958	2.51175	0	0
KEGG	ARRHYTHMOGENIC RIGHT VENTRICULAR CARDIOMYOPATHY ARVC	74	0.696023	2.51166	0	0
KEGG	FRUCTOSE AND MANNOSE METABOLISM	33	0.807341	2.50848	0	0
KEGG	PURINE METABOLISM	156	0.648991	2.50309	0	0
KEGG	ALZHEIMERS DISEASE	158	0.641359	2.4959	0	0
KEGG	PYRUVATE METABOLISM	40	0.76859	2.49009	0	0
KEGG	STEROID HORMONE BIOSYNTHESIS	55	0.719636	2.48068	0	0
KEGG	THYROID CANCER	29	0.818369	2.48024	0	0
KEGG	PROTEASOME	45	0.755215	2.4777	0	0
KEGG	PROPANOATE METABOLISM	31	0.799751	2.47611	0	0
KEGG	DNA REPLICATION	36	0.782665	2.47348	0	0
KEGG	PYRIMIDINE METABOLISM	98	0.664643	2.46735	0	0
KEGG	NITROGEN METABOLISM	23	0.826379	2.45891	0	0
KEGG	FC EPSILON RI SIGNALING PATHWAY	79	0.677461	2.45204	0	0
KEGG	VIRAL MYOCARDITIS	70	0.692797	2.4479	0	0
KEGG	ALANINE ASPARTATE AND GLUTAMATE METABOLISM	32	0.781874	2.44672	0	0
KEGG	CELL ADHESION MOLECULES CAMS	133	0.643685	2.44492	0	0
KEGG	LONG TERM POTENTIATION	70	0.673579	2.43926	0	0
KEGG	GLYCEROLIPID METABOLISM	49	0.734851	2.43152	0	0
KEGG	VASCULAR SMOOTH MUSCLE CONTRACTION	115	0.640879	2.42514	0	0
KEGG	BIOSYNTHESIS OF UNSATURATED FATTY ACIDS	22	0.839995	2.41049	0	0
KEGG	TYPE II DIABETES MELLITUS	47	0.722646	2.4067	0	0
KEGG	JAK STAT SIGNALING PATHWAY	154	0.626162	2.4051	0	0
KEGG	LYSINE DEGRADATION	44	0.727482	2.39922	0	0
KEGG	MELANOGENESIS	101	0.652541	2.3982	0	0
KEGG	MTOR SIGNALING PATHWAY	52	0.698791	2.39205	0	0
KEGG	PRIMARY BILE ACID BIOSYNTHESIS	16	0.878324	2.38783	0	0
KEGG	ALDOSTERONE REGULATED SODIUM REABSORPTION	42	0.73595	2.38483	0	0
KEGG	LONG TERM DEPRESSION	70	0.670636	2.38288	0	0
KEGG	BETA ALANINE METABOLISM	22	0.818968	2.37803	0	0
KEGG	NUCLEOTIDE EXCISION REPAIR	44	0.717612	2.3741	0	0
KEGG	HISTIDINE METABOLISM	29	0.770198	2.35813	0	0
KEGG	TERPENOID BACKBONE BIOSYNTHESIS	15	0.90037	2.35739	0	0
KEGG	TYROSINE METABOLISM	42	0.719947	2.35355	0	0
KEGG	CALCIUM SIGNALING PATHWAY	177	0.604609	2.34997	0	0
KEGG	LYSOSOME	121	0.62576	2.34739	0	0
KEGG	STEROID BIOSYNTHESIS	17	0.860071	2.33361	0	0
KEGG	CYSTEINE AND METHIONINE METABOLISM	34	0.751748	2.32191	0	0
KEGG	CITRATE CYCLE TCA CYCLE	30	0.747569	2.31792	0	0
KEGG	PROXIMAL TUBULE BICARBONATE RECLAMATION	23	0.796446	2.29778	0	0
KEGG	AMINOACYL TRNA BIOSYNTHESIS	41	0.703287	2.29438	0	0
KEGG	UBIQUITIN MEDIATED PROTEOLYSIS	134	0.595444	2.28098	0	0
KEGG	PORPHYRIN AND CHLOROPHYLL METABOLISM	41	0.705363	2.27768	0	0
KEGG	GLYCEROPHOSPHOLIPID METABOLISM	77	0.625584	2.27489	0	0
KEGG	BASAL CELL CARCINOMA	55	0.648623	2.26272	0	0
KEGG	ABC TRANSPORTERS	44	0.697922	2.26124	0	0
KEGG	PHENYLALANINE METABOLISM	18	0.817471	2.24209	0	0
KEGG	PARKINSONS DISEASE	115	0.587824	2.23947	0	0
KEGG	RETINOL METABOLISM	64	0.642142	2.23831	0	0
KEGG	HUNTINGTONS DISEASE	173	0.579167	2.23781	0	0
KEGG	CYTOSOLIC DNA SENSING PATHWAY	53	0.658657	2.23048	0	0
KEGG	VIBRIO CHOLERAE INFECTION	54	0.6484	2.19408	0	0
KEGG	PENTOSE PHOSPHATE PATHWAY	25	0.732728	2.1925	0	0
KEGG	PHOSPHATIDYLINOSITOL SIGNALING SYSTEM	76	0.611665	2.18987	0	9.65841e-06
KEGG	TYPE I DIABETES MELLITUS	43	0.6672	2.18666	0	9.57792e-06
KEGG	MISMATCH REPAIR	23	0.764768	2.1774	0	9.49877e-06
KEGG	SPLICEOSOME	126	0.565942	2.16442	0	9.42091e-06
KEGG	SPHINGOLIPID METABOLISM	39	0.677967	2.15972	0	9.34432e-06
KEGG	RIG I LIKE RECEPTOR SIGNALING PATHWAY	70	0.604034	2.13979	0	1.86599e-05
KEGG	HOMOLOGOUS RECOMBINATION	28	0.714027	2.13502	0	1.85106e-05
KEGG	NATURAL KILLER CELL MEDIATED CYTOTOXICITY	135	0.55877	2.1338	0	1.83637e-05
KEGG	ONE CARBON POOL BY FOLATE	17	0.785939	2.13112	0	1.82191e-05
KEGG	BASE EXCISION REPAIR	34	0.662434	2.12458	0	1.80768e-05
KEGG	GALACTOSE METABOLISM	25	0.713155	2.11935	0.00132626	1.79366e-05
KEGG	ANTIGEN PROCESSING AND PRESENTATION	86	0.581196	2.10564	0	1.77986e-05
KEGG	DRUG METABOLISM OTHER ENZYMES	51	0.6216	2.09997	0	1.76628e-05
KEGG	STARCH AND SUCROSE METABOLISM	51	0.620252	2.099	0	1.7529e-05
KEGG	VASOPRESSIN REGULATED WATER REABSORPTION	43	0.62464	2.06473	0	6.25001e-05
KEGG	INTESTINAL IMMUNE NETWORK FOR IGA PRODUCTION	47	0.620367	2.06443	0	6.20337e-05
KEGG	PANTOTHENATE AND COA BIOSYNTHESIS	16	0.770924	2.06026	0.0014881	6.15742e-05
KEGG	INOSITOL PHOSPHATE METABOLISM	54	0.595177	2.04179	0	0.00013161
KEGG	SELENOAMINO ACID METABOLISM	26	0.686402	2.03642	0	0.000130649
KEGG	NICOTINATE AND NICOTINAMIDE METABOLISM	24	0.698791	2.03423	0	0.00013814
KEGG	SYSTEMIC LUPUS ERYTHEMATOSUS	134	0.532063	2.0296	0	0.000145415
KEGG	GLYOXYLATE AND DICARBOXYLATE METABOLISM	16	0.754961	2.02819	0	0.000144377
KEGG	ETHER LIPID METABOLISM	33	0.64867	2.01581	0	0.000168572
KEGG	OXIDATIVE PHOSPHORYLATION	118	0.523834	1.99206	0	0.000267127
KEGG	ASCORBATE AND ALDARATE METABOLISM	25	0.666852	1.99028	0.00136986	0.000265259
KEGG	PRIMARY IMMUNODEFICIENCY	35	0.620435	1.96456	0	0.000372517
KEGG	CARDIAC MUSCLE CONTRACTION	74	0.543616	1.95136	0	0.000460919
KEGG	LINOLEIC ACID METABOLISM	29	0.638176	1.94897	0	0.00048271
KEGG	ALLOGRAFT REJECTION	37	0.601977	1.93966	0.00128535	0.000577839
KEGG	RIBOSOME	86	0.537815	1.93712	0	0.000622568
KEGG	NOTCH SIGNALING PATHWAY	47	0.586455	1.93524	0.00119617	0.000618389
KEGG	GRAFT VERSUS HOST DISEASE	41	0.584064	1.92534	0.00127551	0.000740403
KEGG	PENTOSE AND GLUCURONATE INTERCONVERSIONS	27	0.636816	1.92186	0	0.000752078
KEGG	HEDGEHOG SIGNALING PATHWAY	56	0.556722	1.91932	0	0.000755051
KEGG	MATURITY ONSET DIABETES OF THE YOUNG	25	0.641313	1.89241	0.00428571	0.00109349
KEGG	RNA DEGRADATION	57	0.546338	1.86822	0.00232019	0.00144963
KEGG	PROTEIN EXPORT	23	0.629051	1.84785	0	0.00200421
KEGG	ALPHA LINOLENIC ACID METABOLISM	19	0.655476	1.84456	0.00301205	0.00207624
KEGG	DORSO VENTRAL AXIS FORMATION	23	0.633673	1.83654	0.00550964	0.00222775
KEGG	RENIN ANGIOTENSIN SYSTEM	16	0.670188	1.80631	0.00753012	0.00309901
KEGG	GLYCOSPHINGOLIPID BIOSYNTHESIS GANGLIO SERIES	15	0.64479	1.72286	0.0170543	0.00755769
KEGG	SNARE INTERACTIONS IN VESICULAR TRANSPORT	38	0.505336	1.60196	0.0265823	0.0213218
KEGG	RIBOFLAVIN METABOLISM	16	0.590467	1.59014	0.0330827	0.0233163
KEGG	N GLYCAN BIOSYNTHESIS	46	0.464547	1.54711	0.0291616	0.0321288
KEGG	GLYCOSAMINOGLYCAN BIOSYNTHESIS KERATAN SULFATE	15	0.593251	1.53912	0.0522273	0.0340923
KEGG	GLYCOSAMINOGLYCAN BIOSYNTHESIS CHONDROITIN SULFATE	22	0.531238	1.52299	0.0622348	0.0380962
KEGG	OTHER GLYCAN DEGRADATION	16	0.561277	1.52099	0.0742942	0.0384021
KEGG	ASTHMA	30	0.477747	1.5043	0.0745672	0.0431373
KEGG	GLYCOSAMINOGLYCAN DEGRADATION	21	0.519936	1.45964	0.0872675	0.0578763
KEGG	O GLYCAN BIOSYNTHESIS	30	0.466963	1.45444	0.087969	0.059411
KEGG	GLYCOSAMINOGLYCAN BIOSYNTHESIS HEPARAN SULFATE	26	0.462571	1.38216	0.109687	0.0925313
KEGG	NEUROACTIVE LIGAND RECEPTOR INTERACTION	272	0.312694	1.24419	0.0951417	0.193538
KEGG	AUTOIMMUNE THYROID DISEASE	51	0.353673	1.18973	0.248499	0.246585
KEGG	OLFACTORY TRANSDUCTION	32	0.381613	1.17411	0.298684	0.262028
KEGG	GLYCOSPHINGOLIPID BIOSYNTHESIS LACTO AND NEOLACTO SERIES	26	0.384225	1.14531	0.309958	0.293384
KEGG	GLYCOSYLPHOSPHATIDYLINOSITOL GPI ANCHOR BIOSYNTHESIS	25	0.350963	1.04549	0.418033	0.418019
KEGG	RNA POLYMERASE	29	0.314925	0.972324	0.5	0.519167
KEGG	BASAL TRANSCRIPTION FACTORS	35	0.233002	0.730526	0.792142	0.837011
KEGG	REGULATION OF AUTOPHAGY	34	0.181241	0.568574	0.959583	0.965718
REACTOME	BETA DEFENSINS	26	-0.514672	-2.00284	0.0035461	0.00677316
REACTOME	CLASS C 3 METABOTROPIC GLUTAMATE PHEROMONE RECEPTORS	37	-0.426994	-1.80832	0.00970874	0.0223
REACTOME	DEFENSINS	36	-0.42343	-1.7768	0.00456621	0.0191486
REACTOME	KERATINIZATION	198	-0.221442	-1.36186	0.0357143	0.208179
REACTOME	CD22 MEDIATED BCR REGULATION	17	-0.398811	-1.35393	0.127273	0.173656
REACTOME	FERTILIZATION	26	-0.312295	-1.23036	0.196581	0.258677
REACTOME	FCGR ACTIVATION	23	-0.257009	-0.94055	0.529221	0.699365
REACTOME	DEFECTIVE GALNT3 CAUSES FAMILIAL HYPERPHOSPHATEMIC TUMORAL CALCINOSIS HFTC	15	-0.198224	-0.647985	0.898204	1
REACTOME	DEFECTIVE C1GALT1C1 CAUSES TN POLYAGGLUTINATION SYNDROME TNPS	16	-0.175412	-0.568703	0.96875	0.98211
REACTOME	INTERLEUKIN 4 AND INTERLEUKIN 13 SIGNALING	110	0.843619	3.15974	0	0
REACTOME	RESPONSE TO ELEVATED PLATELET CYTOSOLIC CA2PLUS	132	0.791264	3.04399	0	0
REACTOME	FATTY ACID METABOLISM	174	0.784244	3.04203	0	0
REACTOME	S PHASE	161	0.774059	3.03204	0	0
REACTOME	MITOTIC G1 G1 S PHASES	149	0.786779	3.00574	0	0
REACTOME	METABOLISM OF STEROIDS	149	0.773781	3.00545	0	0
REACTOME	REGULATION OF LIPID METABOLISM BY PEROXISOME PROLIFERATOR ACTIVATED RECEPTOR ALPHA PPARALPHA	119	0.793151	2.99877	0	0
REACTOME	PROGRAMMED CELL DEATH	178	0.759842	2.97572	0	0
REACTOME	DNA REPLICATION	127	0.767387	2.96471	0	0
REACTOME	CELLULAR RESPONSES TO STRESS	439	0.727287	2.95245	0	0
REACTOME	REGULATION OF INSULIN LIKE GROWTH FACTOR IGF TRANSPORT AND UPTAKE BY INSULIN LIKE GROWTH FACTOR BINDING PROTEINS IGFBPS	123	0.766736	2.93556	0	0
REACTOME	EXTRACELLULAR MATRIX ORGANIZATION	301	0.726698	2.92546	0	0
REACTOME	TRANSCRIPTIONAL REGULATION BY RUNX2	119	0.763456	2.90305	0	0
REACTOME	PLATELET ACTIVATION SIGNALING AND AGGREGATION	259	0.728623	2.88982	0	0
REACTOME	FOXO MEDIATED TRANSCRIPTION	66	0.817991	2.88189	0	0
REACTOME	BIOLOGICAL OXIDATIONS	219	0.729493	2.87621	0	0
REACTOME	MAPK FAMILY SIGNALING CASCADES	296	0.718077	2.87371	0	0
REACTOME	SIGNALING BY NUCLEAR RECEPTORS	261	0.716711	2.87333	0	0
REACTOME	G2 M CHECKPOINTS	168	0.736662	2.87158	0	0
REACTOME	CYCLIN A:CDK2 ASSOCIATED EVENTS AT S PHASE ENTRY	85	0.790333	2.87076	0	0
REACTOME	CELL CYCLE CHECKPOINTS	291	0.725059	2.87019	0	0
REACTOME	PHASE I FUNCTIONALIZATION OF COMPOUNDS	103	0.763098	2.8539	0	0
REACTOME	DNA REPLICATION PRE INITIATION	85	0.771367	2.84646	0	0
REACTOME	INTERLEUKIN 10 SIGNALING	46	0.854022	2.84279	0	0
REACTOME	PI3K AKT SIGNALING IN CANCER	102	0.750917	2.84267	0	0
REACTOME	NON INTEGRIN MEMBRANE ECM INTERACTIONS	59	0.815992	2.83987	0	0
REACTOME	TRANSCRIPTIONAL REGULATION BY RUNX3	95	0.774305	2.83292	0	0
REACTOME	INTEGRIN CELL SURFACE INTERACTIONS	85	0.768127	2.83146	0	0
REACTOME	G1 S DNA DAMAGE CHECKPOINTS	68	0.780199	2.81846	0	0
REACTOME	TRANSCRIPTIONAL REGULATION BY TP53	358	0.695634	2.81097	0	0
REACTOME	CELLULAR SENESCENCE	193	0.708897	2.80445	0	0
REACTOME	MITOTIC G2 G2 M PHASES	199	0.710197	2.80137	0	0
REACTOME	REGULATION OF CHOLESTEROL BIOSYNTHESIS BY SREBP SREBF	55	0.819823	2.79544	0	0
REACTOME	MAPK6 MAPK4 SIGNALING	93	0.753198	2.79342	0	0
REACTOME	METABOLISM OF AMINO ACIDS AND DERIVATIVES	370	0.692534	2.79148	0	0
REACTOME	ESR MEDIATED SIGNALING	218	0.700578	2.78991	0	0
REACTOME	SWITCHING OF ORIGINS TO A POST REPLICATIVE STATE	90	0.758706	2.78848	0	0
REACTOME	OTHER INTERLEUKIN SIGNALING	288	0.695564	2.78793	0	0
REACTOME	DISEASES OF SIGNAL TRANSDUCTION	386	0.687962	2.78554	0	0
REACTOME	TP53 REGULATES TRANSCRIPTION OF CELL CYCLE GENES	48	0.83201	2.78208	0	0
REACTOME	INTERLEUKIN 1 SIGNALING	102	0.748615	2.78138	0	0
REACTOME	TOLL LIKE RECEPTOR CASCADES	153	0.720542	2.77954	0	0
REACTOME	SCF SKP2 MEDIATED DEGRADATION OF P27 P21	60	0.788688	2.77394	0	0
REACTOME	PHASE II CONJUGATION OF COMPOUNDS	109	0.729391	2.77365	0	0
REACTOME	SIGNALING BY RECEPTOR TYROSINE KINASES	468	0.688123	2.77271	0	0
REACTOME	ORC1 REMOVAL FROM CHROMATIN	71	0.771682	2.7698	0	0
REACTOME	DEGRADATION OF THE EXTRACELLULAR MATRIX	140	0.721364	2.7692	0	0
REACTOME	EXTRA NUCLEAR ESTROGEN SIGNALING	74	0.77029	2.76761	0	0
REACTOME	INTRACELLULAR SIGNALING BY SECOND MESSENGERS	302	0.693394	2.76523	0	0
REACTOME	REGULATION OF MITOTIC CELL CYCLE	86	0.75894	2.75777	0	0
REACTOME	ACTIVATION OF GENE EXPRESSION BY SREBF SREBP	42	0.839366	2.757	0	0
REACTOME	CLEC7A DECTIN 1 SIGNALING	100	0.739075	2.7516	0	0
REACTOME	NEUTROPHIL DEGRANULATION	474	0.677789	2.74833	0	0
REACTOME	TRIF TICAM1 MEDIATED TLR4 SIGNALING	97	0.734555	2.74833	0	0
REACTOME	THE ROLE OF GTSE1 IN G2 M PROGRESSION AFTER G2 CHECKPOINT	78	0.773483	2.74442	0	0
REACTOME	METABOLISM OF VITAMINS AND COFACTORS	187	0.704293	2.74422	0	0
REACTOME	MITOTIC METAPHASE AND ANAPHASE	201	0.701846	2.73797	0	0
REACTOME	DEGRADATION OF BETA CATENIN BY THE DESTRUCTION COMPLEX	83	0.744153	2.73721	0	0
REACTOME	GLUTATHIONE CONJUGATION	36	0.857506	2.733	0	0
REACTOME	INTERLEUKIN 1 FAMILY SIGNALING	139	0.703629	2.72959	0	0
REACTOME	TOLL LIKE RECEPTOR TLR1:TLR2 CASCADE	97	0.72713	2.7264	0	0
REACTOME	TOLL LIKE RECEPTOR 4 TLR4 CASCADE	127	0.72123	2.72398	0	0
REACTOME	ACTIVATION OF APC C AND APC C:CDC20 MEDIATED DEGRADATION OF MITOTIC PROTEINS	76	0.758265	2.72198	0	0
REACTOME	ECM PROTEOGLYCANS	76	0.762127	2.72168	0	0
REACTOME	CIRCADIAN CLOCK	69	0.765024	2.70955	0	0
REACTOME	ASSEMBLY OF THE PRE REPLICATIVE COMPLEX	68	0.774135	2.70736	0	0
REACTOME	PLASMA LIPOPROTEIN ASSEMBLY REMODELING AND CLEARANCE	71	0.75123	2.70701	0	0
REACTOME	DOWNSTREAM SIGNALING EVENTS OF B CELL RECEPTOR BCR	81	0.745649	2.70699	0	0
REACTOME	SIGNALING BY VEGF	105	0.731145	2.70221	0	0
REACTOME	RESOLUTION OF SISTER CHROMATID COHESION	125	0.707398	2.70082	0	0
REACTOME	UNFOLDED PROTEIN RESPONSE UPR	91	0.744229	2.69965	0	0
REACTOME	SIGNALING BY TGF BETA RECEPTOR COMPLEX	73	0.749735	2.69911	0	0
REACTOME	MITOTIC PROMETAPHASE	198	0.679507	2.6983	0	0
REACTOME	CHOLESTEROL BIOSYNTHESIS	25	0.916084	2.69673	0	0
REACTOME	INTRINSIC PATHWAY FOR APOPTOSIS	51	0.791707	2.69615	0	0
REACTOME	PROTEIN LOCALIZATION	163	0.695283	2.68635	0	0
REACTOME	RHO GTPASE EFFECTORS	321	0.668098	2.68616	0	0
REACTOME	RHO GTPASES ACTIVATE FORMINS	139	0.696435	2.68274	0	0
REACTOME	PEROXISOMAL PROTEIN IMPORT	62	0.777676	2.68252	0	0
REACTOME	NEGATIVE REGULATION OF THE PI3K AKT NETWORK	110	0.707039	2.68214	0	0
REACTOME	CELLULAR RESPONSE TO HYPOXIA	75	0.751699	2.68185	0	0
REACTOME	M PHASE	391	0.660729	2.68113	0	0
REACTOME	SENESCENCE ASSOCIATED SECRETORY PHENOTYPE SASP	108	0.713945	2.67974	0	0
REACTOME	METABOLISM OF POLYAMINES	59	0.765745	2.67903	0	0
REACTOME	ANTIGEN PROCESSING CROSS PRESENTATION	98	0.731657	2.67809	0	0
REACTOME	REGULATION OF MRNA STABILITY BY PROTEINS THAT BIND AU RICH ELEMENTS	87	0.731437	2.67763	0	0
REACTOME	COLLAGEN FORMATION	90	0.728801	2.67524	0	0
REACTOME	UB SPECIFIC PROCESSING PROTEASES	199	0.677404	2.67305	0	0
REACTOME	ASSEMBLY OF COLLAGEN FIBRILS AND OTHER MULTIMERIC STRUCTURES	61	0.776486	2.67024	0	0
REACTOME	ABC TRANSPORTER DISORDERS	77	0.73513	2.67023	0	0
REACTOME	HSP90 CHAPERONE CYCLE FOR STEROID HORMONE RECEPTORS SHR	56	0.780976	2.66827	0	0
REACTOME	COLLAGEN DEGRADATION	64	0.753637	2.66603	0	0
REACTOME	REGULATION OF RUNX2 EXPRESSION AND ACTIVITY	73	0.744116	2.66472	0	0
REACTOME	BETA CATENIN INDEPENDENT WNT SIGNALING	143	0.697368	2.66098	0	0
REACTOME	TOLL LIKE RECEPTOR 9 TLR9 CASCADE	95	0.719937	2.66057	0	0
REACTOME	PCP CE PATHWAY	92	0.717896	2.6585	0	0
REACTOME	PTEN REGULATION	138	0.683909	2.65753	0	0
REACTOME	TP53 REGULATES TRANSCRIPTION OF CELL DEATH GENES	44	0.820498	2.65688	0	0
REACTOME	METABOLISM OF NUCLEOTIDES	99	0.715589	2.65559	0	0
REACTOME	METABOLISM OF CARBOHYDRATES	290	0.661675	2.65471	0	0
REACTOME	ASYMMETRIC LOCALIZATION OF PCP PROTEINS	64	0.758644	2.65434	0	0
REACTOME	CHEMOKINE RECEPTORS BIND CHEMOKINES	48	0.790036	2.65331	0	0
REACTOME	ARACHIDONIC ACID METABOLISM	59	0.770587	2.65268	0	0
REACTOME	MYD88 CASCADE INITIATED ON PLASMA MEMBRANE	84	0.726328	2.65214	0	0
REACTOME	APC C:CDH1 MEDIATED DEGRADATION OF CDC20 AND OTHER APC C:CDH1 TARGETED PROTEINS IN LATE MITOSIS EARLY G1	72	0.750431	2.65196	0	0
REACTOME	SIGNALING BY NOTCH4	82	0.729574	2.65143	0	0
REACTOME	HSF1 DEPENDENT TRANSACTIVATION	38	0.811587	2.6499	0	0
REACTOME	CELLULAR RESPONSE TO HEAT STRESS	101	0.709731	2.64849	0	0
REACTOME	CONSTITUTIVE SIGNALING BY ABERRANT PI3K IN CANCER	75	0.73611	2.64401	0	0
REACTOME	SIGNALING BY TGF BETA FAMILY MEMBERS	102	0.711835	2.64112	0	0
REACTOME	DISEASES OF METABOLISM	101	0.707059	2.63962	0	0
REACTOME	STABILIZATION OF P53	57	0.762827	2.63895	0	0
REACTOME	AUF1 HNRNP D0 BINDS AND DESTABILIZES MRNA	55	0.768292	2.63754	0	0
REACTOME	DEUBIQUITINATION	276	0.65462	2.6372	0	0
REACTOME	SIGNALING BY NOTCH	243	0.664761	2.63553	0	0
REACTOME	TRANSCRIPTIONAL REGULATION OF WHITE ADIPOCYTE DIFFERENTIATION	84	0.738239	2.63486	0	0
REACTOME	GLUCOSE METABOLISM	91	0.70844	2.63273	0	0
REACTOME	REGULATION OF PTEN STABILITY AND ACTIVITY	69	0.729984	2.62959	0	0
REACTOME	SIGNALING BY RHO GTPASES	449	0.647532	2.62503	0	0
REACTOME	DISORDERS OF TRANSMEMBRANE TRANSPORTERS	177	0.663825	2.62326	0	0
REACTOME	SEMAPHORIN INTERACTIONS	64	0.753627	2.62237	0	0
REACTOME	SYNDECAN INTERACTIONS	27	0.862097	2.61551	0	0
REACTOME	APOPTOTIC EXECUTION PHASE	52	0.767808	2.6133	0	0
REACTOME	ESTROGEN DEPENDENT GENE EXPRESSION	148	0.679927	2.61005	0	0
REACTOME	DETOXIFICATION OF REACTIVE OXYGEN SPECIES	37	0.803052	2.60919	0	0
REACTOME	ABC FAMILY PROTEINS MEDIATED TRANSPORT	103	0.701827	2.60884	0	0
REACTOME	MITOTIC SPINDLE CHECKPOINT	110	0.692963	2.60743	0	0
REACTOME	TNFR2 NON CANONICAL NF KB PATHWAY	99	0.705983	2.60471	0	0
REACTOME	DEATH RECEPTOR SIGNALLING	141	0.679826	2.60244	0	0
REACTOME	NEGATIVE REGULATION OF NOTCH4 SIGNALING	54	0.757604	2.6018	0	0
REACTOME	C TYPE LECTIN RECEPTORS CLRS	139	0.675923	2.60142	0	0
REACTOME	METABOLISM OF FAT SOLUBLE VITAMINS	48	0.776273	2.60001	0	0
REACTOME	ACTIVATION OF NF KAPPAB IN B CELLS	67	0.74268	2.59804	0	0
REACTOME	NUCLEOTIDE BINDING DOMAIN LEUCINE RICH REPEAT CONTAINING RECEPTOR NLR SIGNALING PATHWAYS	54	0.765744	2.59687	0	0
REACTOME	SLC MEDIATED TRANSMEMBRANE TRANSPORT	250	0.647322	2.59601	0	0
REACTOME	TRANSCRIPTIONAL REGULATION BY RUNX1	237	0.653507	2.59461	0	0
REACTOME	ELASTIC FIBRE FORMATION	45	0.77126	2.59424	0	0
REACTOME	SIGNALING BY MET	79	0.726825	2.59355	0	0
REACTOME	CDK MEDIATED PHOSPHORYLATION AND REMOVAL OF CDC6	72	0.744215	2.59226	0	0
REACTOME	DNA DAMAGE TELOMERE STRESS INDUCED SENESCENCE	79	0.707565	2.58966	0	0
REACTOME	REGULATION OF RUNX3 EXPRESSION AND ACTIVITY	55	0.767331	2.58746	0	0
REACTOME	ACTIVATION OF THE PRE REPLICATIVE COMPLEX	33	0.806812	2.58595	0	0
REACTOME	TP53 REGULATES METABOLIC GENES	81	0.719242	2.58553	0	0
REACTOME	SIGNALING BY RETINOIC ACID	43	0.784475	2.58519	0	0
REACTOME	ATF4 ACTIVATES GENES IN RESPONSE TO ENDOPLASMIC RETICULUM STRESS	26	0.856061	2.58384	0	0
REACTOME	TCF DEPENDENT SIGNALING IN RESPONSE TO WNT	232	0.646719	2.58192	0	0
REACTOME	SIGNALING BY WNT	324	0.6361	2.57982	0	0
REACTOME	DECTIN 1 MEDIATED NONCANONICAL NF KB SIGNALING	62	0.740807	2.57868	0	0
REACTOME	PERK REGULATES GENE EXPRESSION	31	0.831099	2.57437	0	0
REACTOME	HOST INTERACTIONS OF HIV FACTORS	131	0.666338	2.57412	0	0
REACTOME	NUCLEAR RECEPTOR TRANSCRIPTION PATHWAY	53	0.749345	2.57138	0	0
REACTOME	CYTOCHROME P450 ARRANGED BY SUBSTRATE TYPE	65	0.723397	2.56208	0	0
REACTOME	TRANSCRIPTIONAL REGULATION OF GRANULOPOIESIS	88	0.699505	2.56069	0	0
REACTOME	INTERFERON SIGNALING	200	0.647189	2.56065	0	0
REACTOME	DEGRADATION OF AXIN	55	0.737112	2.5549	0	0
REACTOME	G1 S SPECIFIC TRANSCRIPTION	29	0.831042	2.55378	0	0
REACTOME	SIGNALING BY RAS MUTANTS	58	0.730899	2.55164	0	0
REACTOME	REGULATION OF TP53 ACTIVITY	160	0.655769	2.54988	0	0
REACTOME	REGULATION OF HSF1 MEDIATED HEAT SHOCK RESPONSE	82	0.704926	2.54952	0	0
REACTOME	SUMOYLATION	187	0.655758	2.54944	0	0
REACTOME	G1 PHASE	44	0.769898	2.54842	0	0
REACTOME	MET PROMOTES CELL MOTILITY	41	0.784756	2.54816	0	0
REACTOME	BINDING AND UPTAKE OF LIGANDS BY SCAVENGER RECEPTORS	53	0.733317	2.54812	0	0
REACTOME	HEDGEHOG LIGAND BIOGENESIS	65	0.727987	2.5463	0	0
REACTOME	TRANSCRIPTIONAL ACTIVITY OF SMAD2 SMAD3:SMAD4 HETEROTRIMER	44	0.769202	2.54327	0	0
REACTOME	METABOLISM OF WATER SOLUBLE VITAMINS AND COFACTORS	121	0.669152	2.54184	0	0
REACTOME	PLASMA LIPOPROTEIN REMODELING	32	0.813301	2.53646	0	0
REACTOME	CHROMOSOME MAINTENANCE	108	0.668828	2.53616	0	0
REACTOME	INTERLEUKIN 12 FAMILY SIGNALING	57	0.736686	2.53408	0	0
REACTOME	SIGNALING BY THE B CELL RECEPTOR BCR	122	0.659816	2.53303	0	0
REACTOME	VIF MEDIATED DEGRADATION OF APOBEC3G	54	0.734521	2.53117	0	0
REACTOME	FC EPSILON RECEPTOR FCERI SIGNALING	142	0.659992	2.53116	0	0
REACTOME	MITOCHONDRIAL FATTY ACID BETA OXIDATION	36	0.789459	2.53071	0	0
REACTOME	ACTIVATION OF ATR IN RESPONSE TO REPLICATION STRESS	37	0.794519	2.52982	0	0
REACTOME	ONCOGENIC MAPK SIGNALING	81	0.698256	2.5292	0	0
REACTOME	FBXL7 DOWN REGULATES AURKA DURING MITOTIC ENTRY AND IN EARLY MITOSIS	55	0.739874	2.52772	0	0
REACTOME	L1CAM INTERACTIONS	120	0.670574	2.527	0	0
REACTOME	MET ACTIVATES PTK2 SIGNALING	30	0.837132	2.52687	0	0
REACTOME	SIGNALING BY MODERATE KINASE ACTIVITY BRAF MUTANTS	45	0.759671	2.52378	0	0
REACTOME	REGULATION OF RAS BY GAPS	68	0.718331	2.52268	0	0
REACTOME	SIGNALING BY PDGF	58	0.739386	2.52131	0	0
REACTOME	CELL SURFACE INTERACTIONS AT THE VASCULAR WALL	149	0.64776	2.52037	0	0
REACTOME	GLUCONEOGENESIS	33	0.813447	2.51772	0	0
REACTOME	OXIDATIVE STRESS INDUCED SENESCENCE	124	0.662474	2.51756	0	0
REACTOME	TRANSCRIPTIONAL REGULATION BY MECP2	63	0.713363	2.51643	0	0
REACTOME	REGULATION OF TP53 ACTIVITY THROUGH PHOSPHORYLATION	92	0.684447	2.51565	0	0
REACTOME	SIGNALING BY HEDGEHOG	150	0.647639	2.51465	0	0
REACTOME	INTERLEUKIN 12 SIGNALING	47	0.752094	2.51274	0	0
REACTOME	INTEGRATION OF ENERGY METABOLISM	107	0.673954	2.51072	0	0
REACTOME	REGULATION OF PLK1 ACTIVITY AT G2 M TRANSITION	87	0.686557	2.50987	0	0
REACTOME	SIGNALING BY NON RECEPTOR TYROSINE KINASES	54	0.736428	2.50834	0	0
REACTOME	G2 M DNA DAMAGE CHECKPOINT	95	0.681164	2.50764	0	0
REACTOME	PYRUVATE METABOLISM AND CITRIC ACID TCA CYCLE	55	0.727637	2.50739	0	0
REACTOME	REGULATION OF APOPTOSIS	53	0.726519	2.50209	0	0
REACTOME	DEGRADATION OF DVL	57	0.732564	2.50197	0	0
REACTOME	DEFECTIVE CFTR CAUSES CYSTIC FIBROSIS	61	0.724994	2.50136	0	0
REACTOME	METABOLIC DISORDERS OF BIOLOGICAL OXIDATION ENZYMES	36	0.795808	2.50055	0	0
REACTOME	DOWNSTREAM TCR SIGNALING	96	0.668231	2.50017	0	0
REACTOME	SIGNALING BY NTRK1 TRKA	78	0.688408	2.49804	0	0
REACTOME	CELL CELL COMMUNICATION	130	0.656401	2.49748	0	0
REACTOME	SIGNALING BY NTRKS	99	0.679626	2.49664	0	0
REACTOME	SIGNALING BY BRAF AND RAF FUSIONS	65	0.716597	2.49632	0	0
REACTOME	PEROXISOMAL LIPID METABOLISM	28	0.818825	2.49444	0	0
REACTOME	HEDGEHOG OFF STATE	113	0.667352	2.49433	0	0
REACTOME	DNA STRAND ELONGATION	32	0.811152	2.49371	0	0
REACTOME	INTERFERON GAMMA SIGNALING	92	0.674734	2.49129	0	0
REACTOME	INTERCONVERSION OF NUCLEOTIDE DI AND TRIPHOSPHATES	29	0.83054	2.49118	0	0
REACTOME	SYNTHESIS OF BILE ACIDS AND BILE SALTS	33	0.788436	2.48876	0	0
REACTOME	SIGNALING BY ERBB4	58	0.722876	2.48866	0	0
REACTOME	ATTENUATION PHASE	28	0.835845	2.48695	0	0
REACTOME	TCR SIGNALING	117	0.65771	2.48651	0	0
REACTOME	RUNX1 REGULATES TRANSCRIPTION OF GENES INVOLVED IN DIFFERENTIATION OF HSCS	128	0.65332	2.48616	0	0
REACTOME	TRANSPORT OF INORGANIC CATIONS ANIONS AND AMINO ACIDS OLIGOPEPTIDES	106	0.666474	2.48448	0	0
REACTOME	UCH PROTEINASES	102	0.665889	2.48418	0	0
REACTOME	INTERLEUKIN 17 SIGNALING	71	0.695764	2.48284	0	0
REACTOME	LAMININ INTERACTIONS	30	0.807008	2.48167	0	0
REACTOME	COLLAGEN BIOSYNTHESIS AND MODIFYING ENZYMES	67	0.69092	2.47965	0	0
REACTOME	G0 AND EARLY G1	27	0.841411	2.47829	0	0
REACTOME	RAF INDEPENDENT MAPK1 3 ACTIVATION	23	0.842506	2.47751	0	0
REACTOME	UPTAKE AND ACTIONS OF BACTERIAL TOXINS	29	0.807982	2.47599	0	0
REACTOME	HEDGEHOG ON STATE	86	0.679835	2.47432	0	0
REACTOME	CELL JUNCTION ORGANIZATION	92	0.679117	2.47261	0	0
REACTOME	SYNTHESIS OF BILE ACIDS AND BILE SALTS VIA 7ALPHA HYDROXYCHOLESTEROL	24	0.842614	2.47251	0	0
REACTOME	HOMOLOGY DIRECTED REPAIR	137	0.63844	2.47185	0	0
REACTOME	SIGNALING BY ROBO RECEPTORS	217	0.623431	2.4709	0	0
REACTOME	BILE ACID AND BILE SALT METABOLISM	42	0.783229	2.4694	0	0
REACTOME	AMINO ACID TRANSPORT ACROSS THE PLASMA MEMBRANE	33	0.788572	2.46902	0	0
REACTOME	GLYCOLYSIS	72	0.689561	2.46829	0	0
REACTOME	HSF1 ACTIVATION	31	0.807597	2.46815	0	0
REACTOME	DEGRADATION OF GLI1 BY THE PROTEASOME	60	0.709893	2.4651	0	0
REACTOME	GENE AND PROTEIN EXPRESSION BY JAK STAT SIGNALING AFTER INTERLEUKIN 12 STIMULATION	38	0.767817	2.46407	0	0
REACTOME	CROSS PRESENTATION OF SOLUBLE EXOGENOUS ANTIGENS ENDOSOMES	49	0.744817	2.46292	0	0
REACTOME	SIGNALING BY SCF KIT	43	0.742179	2.46038	0	0
REACTOME	APOPTOTIC CLEAVAGE OF CELLULAR PROTEINS	38	0.775647	2.45832	0	0
REACTOME	MOLECULES ASSOCIATED WITH ELASTIC FIBRES	38	0.767754	2.45533	0	0
REACTOME	TRANSCRIPTIONAL REGULATION BY THE AP 2 TFAP2 FAMILY OF TRANSCRIPTION FACTORS	38	0.773196	2.45496	0	0
REACTOME	ONCOGENE INDUCED SENESCENCE	35	0.770413	2.45477	0	0
REACTOME	IRE1ALPHA ACTIVATES CHAPERONES	50	0.725687	2.45305	0	0
REACTOME	G PROTEIN MEDIATED EVENTS	53	0.697708	2.45042	0	0
REACTOME	NEGATIVE REGULATION OF MAPK PATHWAY	40	0.758228	2.44928	0	0
REACTOME	EPH EPHRIN SIGNALING	92	0.663345	2.44896	0	0
REACTOME	FATTY ACYL COA BIOSYNTHESIS	36	0.758451	2.44855	0	0
REACTOME	P75 NTR RECEPTOR MEDIATED SIGNALLING	97	0.662725	2.44713	0	0
REACTOME	IRON UPTAKE AND TRANSPORT	58	0.709275	2.44645	0	0
REACTOME	ACTIVATION OF BH3 ONLY PROTEINS	30	0.800738	2.44413	0	0
REACTOME	SIGNALING BY EGFR	49	0.72461	2.44377	0	0
REACTOME	INTERFERON ALPHA BETA SIGNALING	68	0.701417	2.44361	0	0
REACTOME	FORMATION OF FIBRIN CLOT CLOTTING CASCADE	39	0.757981	2.44198	0	0
REACTOME	INFECTIOUS DISEASE	380	0.598263	2.44054	0	0
REACTOME	CLASS I MHC MEDIATED ANTIGEN PROCESSING PRESENTATION	364	0.602153	2.43992	0	0
REACTOME	HDR THROUGH HOMOLOGOUS RECOMBINATION HRR	67	0.688457	2.43848	0	0
REACTOME	TRIGLYCERIDE METABOLISM	38	0.751962	2.43566	0	0
REACTOME	ACTIVATION OF NMDA RECEPTORS AND POSTSYNAPTIC EVENTS	92	0.658121	2.43502	0	0
REACTOME	FOXO MEDIATED TRANSCRIPTION OF OXIDATIVE STRESS METABOLIC AND NEURONAL GENES	30	0.795654	2.43396	0	0
REACTOME	NEURODEGENERATIVE DISEASES	22	0.839479	2.43165	0	0
REACTOME	SIGNALING BY ERBB2	49	0.734314	2.43137	0	0
REACTOME	DNA DOUBLE STRAND BREAK REPAIR	165	0.622137	2.43106	0	0
REACTOME	PLASMA LIPOPROTEIN CLEARANCE	33	0.767125	2.42946	0	0
REACTOME	DNA DAMAGE BYPASS	48	0.726602	2.42498	0	0
REACTOME	THE CITRIC ACID TCA CYCLE AND RESPIRATORY ELECTRON TRANSPORT	161	0.623482	2.42471	0	0
REACTOME	AURKA ACTIVATION BY TPX2	72	0.685118	2.42438	0	0
REACTOME	ANTIVIRAL MECHANISM BY IFN STIMULATED GENES	81	0.665549	2.4228	0	0
REACTOME	REGULATION OF TP53 EXPRESSION AND DEGRADATION	37	0.75039	2.42273	0	0
REACTOME	CLATHRIN MEDIATED ENDOCYTOSIS	144	0.626967	2.42247	0	0
REACTOME	OPIOID SIGNALLING	87	0.667322	2.41917	0	0
REACTOME	SMAD2 SMAD3:SMAD4 HETEROTRIMER REGULATES TRANSCRIPTION	32	0.774871	2.41762	0	0
REACTOME	COLLAGEN CHAIN TRIMERIZATION	44	0.725996	2.41663	0	0
REACTOME	MAP2K AND MAPK ACTIVATION	40	0.729418	2.41531	0	0
REACTOME	PLATELET HOMEOSTASIS	85	0.653084	2.41236	0	0
REACTOME	RHO GTPASES ACTIVATE IQGAPS	31	0.781716	2.41181	0	0
REACTOME	TRANSLOCATION OF SLC2A4 GLUT4 TO THE PLASMA MEMBRANE	71	0.682504	2.41143	0	0
REACTOME	SCAVENGING BY CLASS A RECEPTORS	19	0.866428	2.40923	0	0
REACTOME	DEPOLYMERISATION OF THE NUCLEAR LAMINA	15	0.906693	2.40857	0	0
REACTOME	TRANSPORT OF BILE SALTS AND ORGANIC ACIDS METAL IONS AND AMINE COMPOUNDS	86	0.668011	2.40248	0	0
REACTOME	ENDOGENOUS STEROLS	27	0.796016	2.40195	0	0
REACTOME	NCAM SIGNALING FOR NEURITE OUT GROWTH	63	0.678335	2.40164	0	0
REACTOME	GLYCEROPHOSPHOLIPID BIOSYNTHESIS	123	0.635165	2.40069	0	0
REACTOME	DEACTIVATION OF THE BETA CATENIN TRANSACTIVATING COMPLEX	42	0.721179	2.40057	0	0
REACTOME	SMOOTH MUSCLE CONTRACTION	38	0.750676	2.39541	0	0
REACTOME	TELOMERE MAINTENANCE	81	0.66047	2.39427	0	0
REACTOME	MUSCLE CONTRACTION	206	0.61216	2.39204	0	0
REACTOME	HOMOLOGOUS DNA PAIRING AND STRAND EXCHANGE	42	0.737161	2.3909	0	0
REACTOME	ESTROGEN DEPENDENT NUCLEAR EVENTS DOWNSTREAM OF ESR MEMBRANE SIGNALING	24	0.82634	2.39019	0	0
REACTOME	CA2PLUS PATHWAY	59	0.684503	2.38824	0	0
REACTOME	CASPASE ACTIVATION VIA EXTRINSIC APOPTOTIC SIGNALLING PATHWAY	26	0.789874	2.38784	0	0
REACTOME	GLYCOSAMINOGLYCAN METABOLISM	124	0.630961	2.38757	0	0
REACTOME	BASE EXCISION REPAIR	90	0.637374	2.38694	0	0
REACTOME	BMAL1:CLOCK NPAS2 ACTIVATES CIRCADIAN GENE EXPRESSION	27	0.794354	2.37467	0	0
REACTOME	TGF BETA RECEPTOR SIGNALING ACTIVATES SMADS	32	0.762433	2.37451	0	0
REACTOME	PHOSPHORYLATION OF THE APC C	19	0.855881	2.37147	0	0
REACTOME	INTERLEUKIN 6 FAMILY SIGNALING	24	0.804504	2.36658	0	0
REACTOME	TRANSLESION SYNTHESIS BY Y FAMILY DNA POLYMERASES BYPASSES LESIONS ON DNA TEMPLATE	39	0.73182	2.36549	0	0
REACTOME	REGULATION OF TLR BY ENDOGENOUS LIGAND	19	0.847594	2.3645	0	0
REACTOME	MAPK TARGETS NUCLEAR EVENTS MEDIATED BY MAP KINASES	31	0.759996	2.36408	0	0
REACTOME	SIGNALING BY NOTCH1	73	0.655826	2.3619	0	0
REACTOME	INTERLEUKIN 3 INTERLEUKIN 5 AND GM CSF SIGNALING	48	0.702761	2.35771	0	0
REACTOME	BASIGIN INTERACTIONS	25	0.802158	2.3569	0	0
REACTOME	ION HOMEOSTASIS	54	0.702559	2.35678	0	0
REACTOME	MITOCHONDRIAL BIOGENESIS	89	0.643643	2.35597	0	0
REACTOME	TRANSCRIPTIONAL ACTIVATION OF MITOCHONDRIAL BIOGENESIS	55	0.690555	2.3548	0	0
REACTOME	DUAL INCISION IN GG NER	41	0.717524	2.35425	0	0
REACTOME	MITOTIC PROPHASE	141	0.607563	2.34914	0	0
REACTOME	EXTENSION OF TELOMERES	30	0.7679	2.34859	0	0
REACTOME	REGULATION OF EXPRESSION OF SLITS AND ROBOS	171	0.605682	2.34795	0	0
REACTOME	SIGNALING BY WNT IN CANCER	34	0.742278	2.34625	0	0
REACTOME	STRIATED MUSCLE CONTRACTION	36	0.732208	2.34492	0	0
REACTOME	SIGNALING BY EGFR IN CANCER	24	0.78733	2.34437	0	0
REACTOME	TP53 REGULATES TRANSCRIPTION OF GENES INVOLVED IN G2 CELL CYCLE ARREST	18	0.869297	2.34093	0	0
REACTOME	RECOGNITION OF DNA DAMAGE BY PCNA CONTAINING REPLICATION COMPLEX	30	0.755594	2.34008	0	0
REACTOME	SIGNALING BY NOTCH3	49	0.682431	2.33884	0	0
REACTOME	CARGO RECOGNITION FOR CLATHRIN MEDIATED ENDOCYTOSIS	105	0.627115	2.33595	0	0
REACTOME	TERMINATION OF TRANSLESION DNA SYNTHESIS	32	0.745437	2.33564	0	0
REACTOME	PROCESSING OF DNA DOUBLE STRAND BREAK ENDS	97	0.626855	2.33533	0	0
REACTOME	APC C:CDC20 MEDIATED DEGRADATION OF CYCLIN B	23	0.7838	2.33533	0	0
REACTOME	CELL DEATH SIGNALLING VIA NRAGE NRIF AND NADE	76	0.64653	2.32649	0	0
REACTOME	OVARIAN TUMOR DOMAIN PROTEASES	38	0.704125	2.32559	0	0
REACTOME	NUCLEAR SIGNALING BY ERBB4	32	0.747019	2.3254	0	0
REACTOME	RHO GTPASE CYCLE	138	0.602858	2.32455	0	0
REACTOME	INFLAMMASOMES	20	0.826002	2.32375	0	0
REACTOME	TRAF6 MEDIATED NF KB ACTIVATION	24	0.797858	2.32286	0	0
REACTOME	REGULATION OF INSULIN SECRETION	77	0.64749	2.32284	0	0
REACTOME	DNA REPAIR	329	0.582916	2.3218	0	0
REACTOME	TELOMERE C STRAND LAGGING STRAND SYNTHESIS	24	0.794342	2.3216	0	0
REACTOME	RUNX2 REGULATES BONE DEVELOPMENT	30	0.752883	2.32109	0	0
REACTOME	AMYLOID FIBER FORMATION	107	0.616258	2.31976	0	0
REACTOME	INSERTION OF TAIL ANCHORED PROTEINS INTO THE ENDOPLASMIC RETICULUM MEMBRANE	22	0.793361	2.31924	0	0
REACTOME	SIGNALING BY TYPE 1 INSULIN LIKE GROWTH FACTOR 1 RECEPTOR IGF1R	54	0.666645	2.31676	0	0
REACTOME	FORMATION OF SENESCENCE ASSOCIATED HETEROCHROMATIN FOCI SAHF	17	0.843733	2.31655	0	0
REACTOME	CYTOSOLIC TRNA AMINOACYLATION	24	0.794256	2.31652	0	0
REACTOME	FOXO MEDIATED TRANSCRIPTION OF CELL CYCLE GENES	17	0.860503	2.31478	0	0
REACTOME	BIOSYNTHESIS OF SPECIALIZED PRORESOLVING MEDIATORS SPMS	19	0.833232	2.31341	0	0
REACTOME	NOD1 2 SIGNALING PATHWAY	35	0.727635	2.31311	0	0
REACTOME	TRANSMISSION ACROSS CHEMICAL SYNAPSES	266	0.581792	2.31198	0	0
REACTOME	CONSTITUTIVE SIGNALING BY AKT1 E17K IN CANCER	26	0.794464	2.31134	0	0
REACTOME	NEGATIVE REGULATORS OF DDX58 IFIH1 SIGNALING	34	0.729063	2.31111	0	0
REACTOME	SELENOAMINO ACID METABOLISM	117	0.624873	2.31092	0	0
REACTOME	PHOSPHOLIPID METABOLISM	206	0.586442	2.31056	0	0
REACTOME	TRIGLYCERIDE CATABOLISM	24	0.788433	2.3088	0	0
REACTOME	RESOLUTION OF AP SITES VIA THE MULTIPLE NUCLEOTIDE PATCH REPLACEMENT PATHWAY	25	0.782631	2.30734	0	0
REACTOME	RESOLUTION OF D LOOP STRUCTURES THROUGH SYNTHESIS DEPENDENT STRAND ANNEALING SDSA	26	0.788361	2.30646	0	0
REACTOME	TAK1 ACTIVATES NFKB BY PHOSPHORYLATION AND ACTIVATION OF IKKS COMPLEX	32	0.743702	2.30541	0	0
REACTOME	SIGNALING BY FGFR1 IN DISEASE	38	0.710075	2.30463	0	0
REACTOME	DOWNREGULATION OF TGF BETA RECEPTOR SIGNALING	26	0.773304	2.30386	0	0
REACTOME	PLATELET AGGREGATION PLUG FORMATION	39	0.70364	2.30244	0	0
REACTOME	EPHB MEDIATED FORWARD SIGNALING	42	0.715215	2.30205	0	0
REACTOME	TRNA AMINOACYLATION	42	0.708885	2.30044	0	0
REACTOME	DISEASES ASSOCIATED WITH GLYCOSAMINOGLYCAN METABOLISM	41	0.704539	2.30043	0	0
REACTOME	FACTORS INVOLVED IN MEGAKARYOCYTE DEVELOPMENT AND PLATELET PRODUCTION	165	0.58774	2.29775	0	0
REACTOME	PCNA DEPENDENT LONG PATCH BASE EXCISION REPAIR	21	0.804085	2.2975	0	0
REACTOME	CELL CELL JUNCTION ORGANIZATION	65	0.651736	2.2966	0	0
REACTOME	POLO LIKE KINASE MEDIATED EVENTS	16	0.866475	2.29564	0	0
REACTOME	NEUROTRANSMITTER RELEASE CYCLE	51	0.678395	2.2922	0	0
REACTOME	PREFOLDIN MEDIATED TRANSFER OF SUBSTRATE TO CCT TRIC	28	0.756847	2.29127	0	0
REACTOME	RECRUITMENT OF NUMA TO MITOTIC CENTROSOMES	94	0.6327	2.29077	0	0
REACTOME	LAGGING STRAND SYNTHESIS	20	0.811084	2.29033	0	0
REACTOME	PROTEIN FOLDING	101	0.614835	2.28936	0	0
REACTOME	EGFR DOWNREGULATION	31	0.729755	2.28583	0	3.4684e-06
REACTOME	DAG AND IP3 SIGNALING	40	0.706822	2.2831	0	3.45871e-06
REACTOME	CYCLIN A B1 B2 ASSOCIATED EVENTS DURING G2 M TRANSITION	25	0.780041	2.28267	0	3.44908e-06
REACTOME	VEGFR2 MEDIATED CELL PROLIFERATION	19	0.796419	2.28261	0	3.4395e-06
REACTOME	HDR THROUGH SINGLE STRAND ANNEALING SSA	37	0.709973	2.28072	0	3.42997e-06
REACTOME	NUCLEAR ENVELOPE BREAKDOWN	53	0.671587	2.28059	0	3.4205e-06
REACTOME	TRANSCRIPTIONAL REGULATION BY E2F6	34	0.72395	2.27821	0	6.8401e-06
REACTOME	ASSEMBLY OF ACTIVE LPL AND LIPC LIPASE COMPLEXES	19	0.822079	2.27731	0	6.82131e-06
REACTOME	DOWNSTREAM SIGNAL TRANSDUCTION	29	0.744218	2.27645	0	6.80262e-06
REACTOME	FCERI MEDIATED NF KB ACTIVATION	92	0.614788	2.27629	0	6.78403e-06
REACTOME	RESOLUTION OF ABASIC SITES AP SITES	38	0.721131	2.27414	0	6.76555e-06
REACTOME	PYRUVATE METABOLISM	31	0.749312	2.27368	0	6.74716e-06
REACTOME	NUCLEOSOME ASSEMBLY	73	0.63429	2.27344	0	6.72888e-06
REACTOME	RESOLUTION OF D LOOP STRUCTURES	34	0.712089	2.27301	0	6.71069e-06
REACTOME	E2F MEDIATED REGULATION OF DNA REPLICATION	22	0.780633	2.27147	0	1.00924e-05
REACTOME	SULFUR AMINO ACID METABOLISM	27	0.761361	2.27137	0	1.00653e-05
REACTOME	BRANCHED CHAIN AMINO ACID CATABOLISM	19	0.815174	2.27012	0	1.00383e-05
REACTOME	GROWTH HORMONE RECEPTOR SIGNALING	24	0.784604	2.26995	0	1.00115e-05
REACTOME	SUMOYLATION OF INTRACELLULAR RECEPTORS	30	0.744312	2.26919	0	9.98477e-06
REACTOME	RAF ACTIVATION	30	0.753535	2.2688	0	9.95822e-06
REACTOME	INTEGRIN SIGNALING	27	0.749807	2.26832	0	9.9318e-06
REACTOME	SIGNAL TRANSDUCTION BY L1	21	0.801545	2.26404	0	9.90553e-06
REACTOME	NOTCH1 INTRACELLULAR DOMAIN REGULATES TRANSCRIPTION	47	0.690361	2.26376	0	9.87939e-06
REACTOME	ANTIGEN PRESENTATION: FOLDING ASSEMBLY AND PEPTIDE LOADING OF CLASS I MHC	25	0.762666	2.26274	0	9.85339e-06
REACTOME	GLOBAL GENOME NUCLEOTIDE EXCISION REPAIR GG NER	84	0.6184	2.26253	0	9.82753e-06
REACTOME	PRE NOTCH EXPRESSION AND PROCESSING	117	0.594025	2.26196	0	9.80181e-06
REACTOME	NEDDYLATION	233	0.570926	2.26188	0	9.77621e-06
REACTOME	INTERLEUKIN 7 SIGNALING	34	0.717512	2.26146	0	9.75075e-06
REACTOME	DDX58 IFIH1 MEDIATED INDUCTION OF INTERFERON ALPHA BETA	77	0.62961	2.26062	0	9.72543e-06
REACTOME	G ALPHA I SIGNALLING EVENTS	397	0.560615	2.26004	0	9.70023e-06
REACTOME	TP53 REGULATES TRANSCRIPTION OF GENES INVOLVED IN CYTOCHROME C RELEASE	20	0.804379	2.2581	0	9.67517e-06
REACTOME	GOLGI ASSOCIATED VESICLE BIOGENESIS	56	0.654722	2.25797	0	9.65023e-06
REACTOME	SIGNALING BY FGFR3	40	0.694348	2.25437	0	9.62542e-06
REACTOME	ANTIGEN PROCESSING: UBIQUITINATION PROTEASOME DEGRADATION	303	0.558653	2.25127	0	9.60074e-06
REACTOME	SLC TRANSPORTER DISORDERS	100	0.599134	2.25115	0	9.57619e-06
REACTOME	KINESINS	59	0.648249	2.25019	0	9.55176e-06
REACTOME	SIGNALING BY FGFR IN DISEASE	63	0.637421	2.24984	0	9.52746e-06
REACTOME	SHC1 EVENTS IN ERBB2 SIGNALING	22	0.783012	2.24977	0	9.50327e-06
REACTOME	ACTIVATION OF HOX GENES DURING DIFFERENTIATION	120	0.58439	2.24927	0	9.47922e-06
REACTOME	HIV INFECTION	233	0.563313	2.24909	0	9.45528e-06
REACTOME	ORGANELLE BIOGENESIS AND MAINTENANCE	290	0.566036	2.24909	0	9.43146e-06
REACTOME	CENTROSOME MATURATION	81	0.621934	2.24783	0	9.40776e-06
REACTOME	TRANSCRIPTION OF E2F TARGETS UNDER NEGATIVE CONTROL BY DREAM COMPLEX	19	0.827724	2.24758	0	9.38418e-06
REACTOME	SYNTHESIS OF VERY LONG CHAIN FATTY ACYL COAS	24	0.767924	2.24618	0	9.36072e-06
REACTOME	REGULATION OF PTEN GENE TRANSCRIPTION	60	0.643542	2.24414	0	9.33738e-06
REACTOME	CD28 CO STIMULATION	33	0.715715	2.24332	0	9.31415e-06
REACTOME	MHC CLASS II ANTIGEN PRESENTATION	123	0.596567	2.24266	0	9.29104e-06
REACTOME	SIGNALING BY ERYTHROPOIETIN	25	0.752396	2.24262	0	9.26804e-06
REACTOME	COPI DEPENDENT GOLGI TO ER RETROGRADE TRAFFIC	98	0.600599	2.23859	0	9.24516e-06
REACTOME	GPVI MEDIATED ACTIVATION CASCADE	35	0.711407	2.23824	0	9.22239e-06
REACTOME	REGULATION OF PYRUVATE DEHYDROGENASE PDH COMPLEX	16	0.826691	2.23771	0	9.19973e-06
REACTOME	VEGFR2 MEDIATED VASCULAR PERMEABILITY	27	0.736752	2.2373	0	9.17718e-06
REACTOME	ACTIVATION OF MATRIX METALLOPROTEINASES	33	0.699892	2.23609	0	9.15474e-06
REACTOME	MEIOSIS	116	0.584944	2.23383	0	9.13242e-06
REACTOME	VISUAL PHOTOTRANSDUCTION	99	0.608403	2.23326	0	9.11019e-06
REACTOME	ASPARAGINE N LINKED GLYCOSYLATION	303	0.55922	2.23212	0	9.08808e-06
REACTOME	GOLGI TO ER RETROGRADE TRANSPORT	132	0.591473	2.23145	0	9.06608e-06
REACTOME	NUCLEAR EVENTS KINASE AND TRANSCRIPTION FACTOR ACTIVATION	25	0.748365	2.23099	0	9.04418e-06
REACTOME	ADHERENS JUNCTIONS INTERACTIONS	33	0.714541	2.22946	0	9.02238e-06
REACTOME	ION TRANSPORT BY P TYPE ATPASES	55	0.646508	2.22938	0	9.0007e-06
REACTOME	DISEASES OF IMMUNE SYSTEM	24	0.770524	2.22913	0	8.97911e-06
REACTOME	TNF SIGNALING	43	0.679736	2.22863	0	8.95763e-06
REACTOME	SIGNALING BY FGFR	87	0.601801	2.22703	0	8.93625e-06
REACTOME	AUTOPHAGY	109	0.593546	2.22613	0	8.91498e-06
REACTOME	DEFECTIVE B4GALT7 CAUSES EDS PROGEROID TYPE	20	0.783019	2.22384	0	8.8938e-06
REACTOME	COOPERATION OF PREFOLDIN AND TRIC CCT IN ACTIN AND TUBULIN FOLDING	33	0.712565	2.2228	0	8.87273e-06
REACTOME	THE NLRP3 INFLAMMASOME	15	0.843372	2.22211	0	8.85175e-06
REACTOME	DOWNREGULATION OF ERBB2 SIGNALING	28	0.752357	2.22135	0	8.83087e-06
REACTOME	DUAL INCISION IN TC NER	65	0.634923	2.22066	0	8.81009e-06
REACTOME	SYNTHESIS OF BILE ACIDS AND BILE SALTS VIA 27 HYDROXYCHOLESTEROL	15	0.851733	2.21947	0	8.78941e-06
REACTOME	SIGNALING BY INSULIN RECEPTOR	78	0.616404	2.21883	0	8.76883e-06
REACTOME	TP53 REGULATES TRANSCRIPTION OF ADDITIONAL CELL CYCLE GENES WHOSE EXACT ROLE IN THE P53 PATHWAY REMAIN UNCERTAIN	20	0.775691	2.21778	0	8.74834e-06
REACTOME	NCAM1 INTERACTIONS	42	0.680914	2.21651	0	1.16067e-05
REACTOME	SIGNALING BY FGFR1	50	0.658082	2.216	0	1.15797e-05
REACTOME	CA DEPENDENT EVENTS	36	0.694897	2.21317	0	1.44295e-05
REACTOME	INFLUENZA INFECTION	155	0.568599	2.21231	0	1.43961e-05
REACTOME	TRANSCRIPTION OF E2F TARGETS UNDER NEGATIVE CONTROL BY P107 RBL1 AND P130 RBL2 IN COMPLEX WITH HDAC1	16	0.827158	2.21154	0	1.43629e-05
REACTOME	COMMON PATHWAY OF FIBRIN CLOT FORMATION	22	0.772636	2.21149	0	1.43298e-05
REACTOME	CONDENSATION OF PROPHASE CHROMOSOMES	72	0.61819	2.21077	0	1.42968e-05
REACTOME	RA BIOSYNTHESIS PATHWAY	22	0.766098	2.21053	0	1.4264e-05
REACTOME	FCGAMMA RECEPTOR FCGR DEPENDENT PHAGOCYTOSIS	97	0.599843	2.21021	0	1.42314e-05
REACTOME	FOXO MEDIATED TRANSCRIPTION OF CELL DEATH GENES	16	0.82652	2.20973	0	1.41989e-05
REACTOME	RET SIGNALING	41	0.669446	2.20892	0	1.41666e-05
REACTOME	TRANSLATION	292	0.55177	2.20871	0	1.41344e-05
REACTOME	SIGNALING BY NOTCH1 IN CANCER	58	0.647067	2.20864	0	1.41023e-05
REACTOME	SPHINGOLIPID METABOLISM	88	0.599435	2.20833	0	1.40704e-05
REACTOME	REGULATION OF MECP2 EXPRESSION AND ACTIVITY	32	0.697968	2.20802	0	1.40386e-05
REACTOME	RHO GTPASES ACTIVATE ROCKS	19	0.779599	2.20778	0	1.4007e-05
REACTOME	CHONDROITIN SULFATE DERMATAN SULFATE METABOLISM	50	0.65391	2.20354	0	1.39756e-05
REACTOME	GAP FILLING DNA REPAIR SYNTHESIS AND LIGATION IN GG NER	25	0.747654	2.20334	0	1.39442e-05
REACTOME	SYNTHESIS OF PROSTAGLANDINS PG AND THROMBOXANES TX	15	0.8263	2.20333	0	1.3913e-05
REACTOME	RHO GTPASES ACTIVATE PKNS	92	0.60221	2.20266	0	1.3882e-05
REACTOME	FGFR1 MUTANT RECEPTOR ACTIVATION	31	0.714279	2.20196	0	1.3851e-05
REACTOME	EPH EPHRIN MEDIATED REPULSION OF CELLS	51	0.641327	2.2016	0	1.38203e-05
REACTOME	EPHA MEDIATED GROWTH CONE COLLAPSE	29	0.720443	2.1958	0	1.65173e-05
REACTOME	SIGNALING BY FGFR4	41	0.670132	2.19567	0	1.64807e-05
REACTOME	METABOLISM OF STEROID HORMONES	34	0.693318	2.19152	0	1.91285e-05
REACTOME	PLASMA LIPOPROTEIN ASSEMBLY	19	0.776371	2.19071	0	1.90864e-05
REACTOME	INTERLEUKIN 2 FAMILY SIGNALING	44	0.675036	2.18945	0	1.90445e-05
REACTOME	INHIBITION OF THE PROTEOLYTIC ACTIVITY OF APC C REQUIRED FOR THE ONSET OF ANAPHASE BY MITOTIC SPINDLE CHECKPOINT COMPONENTS	20	0.774977	2.18901	0	1.90027e-05
REACTOME	INSULIN RECEPTOR SIGNALLING CASCADE	54	0.637348	2.18873	0	1.89611e-05
REACTOME	FORMATION OF INCISION COMPLEX IN GG NER	43	0.653128	2.18866	0	1.89197e-05
REACTOME	FORMATION OF TUBULIN FOLDING INTERMEDIATES BY CCT TRIC	26	0.719075	2.18821	0	1.88785e-05
REACTOME	DISEASES OF GLYCOSYLATION	142	0.571649	2.18816	0	1.88375e-05
REACTOME	RUNX2 REGULATES OSTEOBLAST DIFFERENTIATION	23	0.757626	2.18311	0	2.14007e-05
REACTOME	ANCHORING OF THE BASAL BODY TO THE PLASMA MEMBRANE	97	0.595363	2.18198	0	2.13544e-05
REACTOME	TRANS GOLGI NETWORK VESICLE BUDDING	72	0.607296	2.17954	0	2.13083e-05
REACTOME	REGULATED NECROSIS	20	0.757986	2.17832	0	2.12624e-05
REACTOME	COMPLEMENT CASCADE	68	0.611943	2.17814	0	2.12166e-05
REACTOME	SEMA4D IN SEMAPHORIN SIGNALING	24	0.747328	2.17802	0	2.11711e-05
REACTOME	TRANSCRIPTION COUPLED NUCLEOTIDE EXCISION REPAIR TC NER	78	0.602233	2.17794	0	2.11258e-05
REACTOME	SIGNALING BY NTRK2 TRKB	25	0.739444	2.17745	0	2.37368e-05
REACTOME	TRANSCRIPTIONAL REGULATION OF PLURIPOTENT STEM CELLS	31	0.718859	2.17705	0	2.36862e-05
REACTOME	CD28 DEPENDENT PI3K AKT SIGNALING	22	0.757639	2.17358	0	2.36358e-05
REACTOME	TRANSLESION SYNTHESIS BY POLH	19	0.767149	2.1717	0	2.61806e-05
REACTOME	NETRIN 1 SIGNALING	50	0.639834	2.17122	0	2.61251e-05
REACTOME	DAP12 SIGNALING	29	0.710457	2.17017	0	2.60699e-05
REACTOME	A TETRASACCHARIDE LINKER SEQUENCE IS REQUIRED FOR GAG SYNTHESIS	26	0.741083	2.16934	0	2.60149e-05
REACTOME	METAL ION SLC TRANSPORTERS	26	0.723695	2.16835	0	2.85167e-05
REACTOME	PROTEIN UBIQUITINATION	79	0.60632	2.16739	0	2.84568e-05
REACTOME	G ALPHA Z SIGNALLING EVENTS	47	0.640412	2.16539	0	2.83971e-05
REACTOME	NUCLEOTIDE EXCISION REPAIR	110	0.580491	2.16535	0	2.83377e-05
REACTOME	MEIOTIC RECOMBINATION	85	0.593621	2.16407	0	2.82786e-05
REACTOME	CHAPERONE MEDIATED AUTOPHAGY	16	0.808817	2.16303	0	3.32763e-05
REACTOME	CTLA4 INHIBITORY SIGNALING	21	0.759164	2.15981	0	3.83057e-05
REACTOME	PI3K EVENTS IN ERBB2 SIGNALING	16	0.811849	2.15667	0	4.07851e-05
REACTOME	GAB1 SIGNALOSOME	17	0.77348	2.15427	0	4.07007e-05
REACTOME	NUCLEOTIDE SALVAGE	23	0.754085	2.15421	0	4.06166e-05
REACTOME	PROCESSIVE SYNTHESIS ON THE LAGGING STRAND	15	0.81661	2.15392	0	4.31197e-05
REACTOME	COSTIMULATION BY THE CD28 FAMILY	68	0.615111	2.1521	0	4.55922e-05
REACTOME	TNFR1 INDUCED NFKAPPAB SIGNALING PATHWAY	30	0.707088	2.15129	0	4.80511e-05
REACTOME	VITAMIN B5 PANTOTHENATE METABOLISM	17	0.776843	2.15001	0.00151976	5.30508e-05
REACTOME	APC CDC20 MEDIATED DEGRADATION OF NEK2A	25	0.731762	2.14972	0	5.29423e-05
REACTOME	DISEASES OF CARBOHYDRATE METABOLISM	34	0.692698	2.14866	0	5.54084e-05
REACTOME	TP53 REGULATES TRANSCRIPTION OF DNA REPAIR GENES	64	0.602899	2.14792	0	5.78407e-05
REACTOME	FORMATION OF THE BETA CATENIN:TCF TRANSACTIVATING COMPLEX	90	0.597154	2.14597	0	6.02268e-05
REACTOME	RECYCLING PATHWAY OF L1	48	0.634942	2.14563	0	6.01046e-05
REACTOME	NEUROTRANSMITTER RECEPTORS AND POSTSYNAPTIC SIGNAL TRANSMISSION	201	0.545656	2.14309	0	5.99829e-05
REACTOME	CROSSLINKING OF COLLAGEN FIBRILS	18	0.777156	2.14145	0	5.98618e-05
REACTOME	PEPTIDE LIGAND BINDING RECEPTORS	188	0.551411	2.14072	0	5.97411e-05
REACTOME	EUKARYOTIC TRANSLATION INITIATION	119	0.56506	2.14053	0	5.96209e-05
REACTOME	RHO GTPASES ACTIVATE PAKS	21	0.76472	2.13945	0	5.95011e-05
REACTOME	RHO GTPASES ACTIVATE CIT	19	0.790561	2.13744	0	6.4447e-05
REACTOME	ACTIVATION OF AMPK DOWNSTREAM OF NMDARS	28	0.714068	2.13668	0	6.43181e-05
REACTOME	SYNTHESIS OF SUBSTRATES IN N GLYCAN BIOSYTHESIS	62	0.618798	2.13634	0	6.41898e-05
REACTOME	CASPASE ACTIVATION VIA DEATH RECEPTORS IN THE PRESENCE OF LIGAND	16	0.8001	2.13587	0	6.40619e-05
REACTOME	CITRIC ACID CYCLE TCA CYCLE	22	0.74665	2.13532	0	6.8788e-05
REACTOME	G ALPHA 12 13 SIGNALLING EVENTS	79	0.58916	2.13518	0	6.86515e-05
REACTOME	ERBB2 REGULATES CELL MOTILITY	15	0.816519	2.13445	0	6.85156e-05
REACTOME	EFFECTS OF PIP2 HYDROLYSIS	27	0.715871	2.13376	0	6.83802e-05
REACTOME	NRAGE SIGNALS DEATH THROUGH JNK	59	0.616369	2.13165	0	6.82453e-05
REACTOME	GLYCOGEN METABOLISM	27	0.699906	2.13102	0.00134953	7.05107e-05
REACTOME	INTERLEUKIN RECEPTOR SHC SIGNALING	27	0.697735	2.12997	0	7.03722e-05
REACTOME	ER TO GOLGI ANTEROGRADE TRANSPORT	154	0.546372	2.12995	0	7.02342e-05
REACTOME	CYTOSOLIC SENSORS OF PATHOGEN ASSOCIATED DNA	63	0.607197	2.12979	0	7.00967e-05
REACTOME	REGULATION OF RUNX1 EXPRESSION AND ACTIVITY	17	0.793066	2.12828	0	7.4744e-05
REACTOME	DOWNREGULATION OF SMAD2 3:SMAD4 TRANSCRIPTIONAL ACTIVITY	23	0.729353	2.12544	0	7.93975e-05
REACTOME	SIGNALING BY HIPPO	20	0.742897	2.12504	0	7.9243e-05
REACTOME	SUMOYLATION OF DNA REPLICATION PROTEINS	46	0.642054	2.12405	0	7.90891e-05
REACTOME	EPIGENETIC REGULATION OF GENE EXPRESSION	146	0.551695	2.12357	0	7.89359e-05
REACTOME	ACTIVATION OF THE MRNA UPON BINDING OF THE CAP BINDING COMPLEX AND EIFS AND SUBSEQUENT BINDING TO 43S	60	0.601849	2.12203	0	8.11626e-05
REACTOME	G ALPHA Q SIGNALLING EVENTS	216	0.535208	2.12188	0	8.10059e-05
REACTOME	TRANSPORT TO THE GOLGI AND SUBSEQUENT MODIFICATION	185	0.550183	2.12008	0	8.08499e-05
REACTOME	SIGNALING BY LIGAND RESPONSIVE EGFR VARIANTS IN CANCER	18	0.771098	2.11954	0	8.06944e-05
REACTOME	METABOLISM OF PORPHYRINS	16	0.794687	2.11892	0.00151057	8.05395e-05
REACTOME	GLYOXYLATE METABOLISM AND GLYCINE DEGRADATION	31	0.703763	2.11794	0	8.03852e-05
REACTOME	SIGNALING BY NTRK3 TRKC	17	0.758062	2.11732	0.0015015	8.02315e-05
REACTOME	METABOLISM OF COFACTORS	19	0.762898	2.11648	0	8.24322e-05
REACTOME	NUCLEOBASE BIOSYNTHESIS	15	0.794815	2.11597	0	8.22752e-05
REACTOME	RESPIRATORY ELECTRON TRANSPORT	90	0.578863	2.11531	0	8.21187e-05
REACTOME	CELL EXTRACELLULAR MATRIX INTERACTIONS	18	0.75599	2.11524	0	8.19629e-05
REACTOME	TFAP2 AP 2 FAMILY REGULATES TRANSCRIPTION OF GROWTH FACTORS AND THEIR RECEPTORS	15	0.793516	2.1151	0	8.18077e-05
REACTOME	RHO GTPASES ACTIVATE NADPH OXIDASES	24	0.722065	2.11412	0	8.39876e-05
REACTOME	REGULATION OF TNFR1 SIGNALING	33	0.682325	2.11392	0	8.38291e-05
REACTOME	SIGNALING BY FGFR2	73	0.585719	2.11169	0	8.60247e-05
REACTOME	CARGO CONCENTRATION IN THE ER	33	0.665672	2.11148	0	8.5863e-05
REACTOME	POST CHAPERONIN TUBULIN FOLDING PATHWAY	23	0.718751	2.11128	0	8.57019e-05
REACTOME	SIGNALLING TO ERKS	32	0.682829	2.11102	0	8.55414e-05
REACTOME	TRANSPORT OF CONNEXONS TO THE PLASMA MEMBRANE	20	0.756774	2.10887	0	8.7672e-05
REACTOME	HS GAG BIOSYNTHESIS	31	0.683785	2.1086	0	8.75084e-05
REACTOME	DNA DOUBLE STRAND BREAK RESPONSE	77	0.583344	2.1076	0	8.9601e-05
REACTOME	ACTIVATION OF BAD AND TRANSLOCATION TO MITOCHONDRIA	15	0.797737	2.10717	0	9.1727e-05
REACTOME	INTRA GOLGI AND RETROGRADE GOLGI TO ER TRAFFIC	201	0.542089	2.10716	0	9.15568e-05
REACTOME	SEMA4D INDUCED CELL MIGRATION AND GROWTH CONE COLLAPSE	20	0.743699	2.10709	0	9.13873e-05
REACTOME	COPI INDEPENDENT GOLGI TO ER RETROGRADE TRAFFIC	52	0.619996	2.10679	0	9.35162e-05
REACTOME	RESPIRATORY ELECTRON TRANSPORT ATP SYNTHESIS BY CHEMIOSMOTIC COUPLING AND HEAT PRODUCTION BY UNCOUPLING PROTEINS	110	0.561328	2.10443	0	9.55671e-05
REACTOME	CREB1 PHOSPHORYLATION THROUGH NMDA RECEPTOR MEDIATED ACTIVATION OF RAS SIGNALING	28	0.694166	2.10195	0	0.000102137
REACTOME	APOPTOTIC FACTOR MEDIATED RESPONSE	16	0.796417	2.10192	0	0.00010195
REACTOME	P75NTR SIGNALS VIA NF KB	16	0.785985	2.10084	0	0.000101763
REACTOME	REGULATION OF KIT SIGNALING	16	0.772649	2.0984	0	0.00010601
REACTOME	SYNTHESIS OF PC	28	0.690418	2.09556	0	0.000114789
REACTOME	NOTCH3 INTRACELLULAR DOMAIN REGULATES TRANSCRIPTION	25	0.714211	2.09424	0	0.000119171
REACTOME	NEURONAL SYSTEM	406	0.518521	2.09325	0	0.000121212
REACTOME	COPII MEDIATED VESICLE TRANSPORT	68	0.593671	2.09313	0	0.000120992
REACTOME	IRS MEDIATED SIGNALLING	48	0.633463	2.09038	0	0.000129851
REACTOME	MITOCHONDRIAL PROTEIN IMPORT	65	0.59204	2.08995	0	0.000129616
REACTOME	E3 UBIQUITIN LIGASES UBIQUITINATE TARGET PROTEINS	59	0.597752	2.08988	0	0.000129382
REACTOME	MRNA SPLICING	187	0.528643	2.08748	0	0.000135758
REACTOME	OTHER SEMAPHORIN INTERACTIONS	19	0.750074	2.08659	0	0.000139931
REACTOME	ASSOCIATION OF TRIC CCT WITH TARGET PROTEINS DURING BIOSYNTHESIS	39	0.650532	2.08639	0	0.00013968
REACTOME	ACTIVATION OF IRF3 IRF7 MEDIATED BY TBK1 IKK EPSILON	17	0.761321	2.08189	0	0.000141687
REACTOME	RORA ACTIVATES GENE EXPRESSION	18	0.75072	2.08157	0	0.000143691
REACTOME	METABOLISM OF FOLATE AND PTERINES	17	0.776195	2.08129	0	0.00014566
REACTOME	NICOTINAMIDE SALVAGING	19	0.748503	2.08108	0.00145773	0.0001454
REACTOME	REGULATION OF SIGNALING BY CBL	22	0.725889	2.08005	0	0.000145141
REACTOME	CRMPS IN SEMA3A SIGNALING	16	0.786852	2.07988	0	0.000144883
REACTOME	NUCLEOBASE CATABOLISM	36	0.654933	2.07913	0	0.000144626
REACTOME	XENOBIOTICS	24	0.707737	2.07542	0.00137552	0.000150904
REACTOME	ASSEMBLY AND CELL SURFACE PRESENTATION OF NMDA RECEPTORS	42	0.629266	2.07471	0	0.000152823
REACTOME	NICOTINATE METABOLISM	31	0.675415	2.0737	0	0.000154732
REACTOME	CILIUM ASSEMBLY	201	0.52406	2.07293	0	0.000156563
REACTOME	MEIOTIC SYNAPSIS	78	0.566194	2.07223	0	0.000158426
REACTOME	RIP MEDIATED NFKB ACTIVATION VIA ZBP1	17	0.763663	2.07066	0	0.000171167
REACTOME	GASTRIN CREB SIGNALLING PATHWAY VIA PKC AND MAPK	18	0.765942	2.07059	0	0.000170866
REACTOME	DARPP 32 EVENTS	23	0.71317	2.06519	0	0.000181299
REACTOME	HEPARAN SULFATE HEPARIN HS GAG METABOLISM	55	0.614696	2.06401	0	0.000185314
REACTOME	GLUTAMATE NEUROTRANSMITTER RELEASE CYCLE	24	0.709065	2.06308	0	0.000187138
REACTOME	DOWNSTREAM SIGNALING OF ACTIVATED FGFR1	31	0.668992	2.0629	0	0.000186812
REACTOME	PLATELET CALCIUM HOMEOSTASIS	28	0.692571	2.06229	0	0.000188646
REACTOME	SIGNALLING TO RAS	20	0.717606	2.06212	0.00140056	0.000188318
REACTOME	PEPTIDE HORMONE METABOLISM	89	0.561103	2.06058	0	0.000192283
REACTOME	PLATELET SENSITIZATION BY LDL	17	0.751882	2.05978	0.00292398	0.00019834
REACTOME	GABA SYNTHESIS RELEASE REUPTAKE AND DEGRADATION	19	0.751322	2.05975	0	0.000197997
REACTOME	MITOPHAGY	29	0.676497	2.05867	0	0.000199811
REACTOME	SEMA3A PAK DEPENDENT AXON REPULSION	16	0.800581	2.05768	0	0.000199467
REACTOME	RHO GTPASES ACTIVATE WASPS AND WAVES	36	0.64454	2.05728	0	0.000199124
REACTOME	ACTIVATED TAK1 MEDIATES P38 MAPK ACTIVATION	23	0.721125	2.0564	0	0.000205011
REACTOME	ANCHORING FIBRIL FORMATION	15	0.78237	2.05505	0.00155039	0.000208897
REACTOME	NEGATIVE REGULATION OF FGFR3 SIGNALING	29	0.66208	2.05478	0	0.000210657
REACTOME	MISMATCH REPAIR	15	0.780986	2.05328	0.00153139	0.000218854
REACTOME	IL 6 TYPE CYTOKINE RECEPTOR LIGAND INTERACTIONS	17	0.756366	2.0521	0	0.000222675
REACTOME	DOWNSTREAM SIGNALING OF ACTIVATED FGFR3	25	0.69705	2.05077	0	0.000222297
REACTOME	CHROMATIN ORGANIZATION	271	0.517008	2.05048	0	0.000223973
REACTOME	GAP JUNCTION TRAFFICKING AND REGULATION	50	0.60827	2.04851	0	0.000229816
REACTOME	RECYCLING OF BILE ACIDS AND SALTS	16	0.77257	2.04673	0	0.000235582
REACTOME	N GLYCAN TRIMMING IN THE ER AND CALNEXIN CALRETICULIN CYCLE	35	0.650771	2.04498	0.00129702	0.000235184
REACTOME	RUNX1 REGULATES GENES INVOLVED IN MEGAKARYOCYTE DIFFERENTIATION AND PLATELET FUNCTION	96	0.550932	2.04358	0	0.000240992
REACTOME	BIOSYNTHESIS OF THE N GLYCAN PRECURSOR DOLICHOL LIPID LINKED OLIGOSACCHARIDE LLO AND TRANSFER TO A NASCENT PROTEIN	77	0.561533	2.04316	0	0.000240586
REACTOME	SPHINGOLIPID DE NOVO BIOSYNTHESIS	44	0.626986	2.0395	0	0.000256816
REACTOME	INTRINSIC PATHWAY OF FIBRIN CLOT FORMATION	22	0.704642	2.03911	0	0.000256385
REACTOME	CALNEXIN CALRETICULIN CYCLE	26	0.6858	2.03861	0	0.000255956
REACTOME	NONSENSE MEDIATED DECAY NMD INDEPENDENT OF THE EXON JUNCTION COMPLEX EJC	95	0.54303	2.03658	0	0.000269887
REACTOME	SRP DEPENDENT COTRANSLATIONAL PROTEIN TARGETING TO MEMBRANE	112	0.544818	2.03384	0	0.000277497
REACTOME	LDL CLEARANCE	19	0.732862	2.0334	0	0.000277034
REACTOME	SIGNALING BY CYTOSOLIC FGFR1 FUSION MUTANTS	18	0.754717	2.03339	0	0.000276573
REACTOME	ZBP1 DAI MEDIATED INDUCTION OF TYPE I IFNS	21	0.717235	2.03324	0	0.000276114
REACTOME	TIE2 SIGNALING	18	0.738332	2.03145	0	0.000275656
REACTOME	IKK COMPLEX RECRUITMENT MEDIATED BY RIP1	23	0.69964	2.03115	0	0.0002752
REACTOME	COOPERATION OF PDCL PHLP1 AND TRIC CCT IN G PROTEIN BETA FOLDING	41	0.62315	2.02465	0	0.000303055
REACTOME	SYNTHESIS OF ACTIVE UBIQUITIN: ROLES OF E1 AND E2 ENZYMES	30	0.659743	2.02243	0	0.000310693
REACTOME	LISTERIA MONOCYTOGENES ENTRY INTO HOST CELLS	20	0.713044	2.01886	0.00148148	0.000320277
REACTOME	PLATELET ADHESION TO EXPOSED COLLAGEN	15	0.769066	2.01829	0	0.000325782
REACTOME	CARDIAC CONDUCTION	138	0.5282	2.01769	0	0.000335356
REACTOME	SPRY REGULATION OF FGF SIGNALING	16	0.736313	2.01335	0.00152439	0.000373387
REACTOME	COPI MEDIATED ANTEROGRADE TRANSPORT	101	0.537513	2.01302	0	0.000374827
REACTOME	NUCLEAR PORE COMPLEX NPC DISASSEMBLY	36	0.633072	2.01186	0.00128866	0.000380255
REACTOME	CD209 DC SIGN SIGNALING	21	0.710624	2.01067	0	0.00038368
REACTOME	P130CAS LINKAGE TO MAPK SIGNALING FOR INTEGRINS	15	0.756931	2.00998	0	0.00038703
REACTOME	MTOR SIGNALLING	39	0.61569	2.00784	0	0.000392441
REACTOME	METABOLISM OF ANGIOTENSINOGEN TO ANGIOTENSINS	17	0.736463	2.00389	0	0.000405888
REACTOME	HYALURONAN METABOLISM	17	0.731124	2.00303	0.00146843	0.000411284
REACTOME	DISASSEMBLY OF THE DESTRUCTION COMPLEX AND RECRUITMENT OF AXIN TO THE MEMBRANE	31	0.649474	2.00207	0	0.000416601
REACTOME	ION CHANNEL TRANSPORT	183	0.5099	2.00201	0	0.000415928
REACTOME	THROMBIN SIGNALLING THROUGH PROTEINASE ACTIVATED RECEPTORS PARS	31	0.646738	2.00096	0	0.000427103
REACTOME	BETA CATENIN PHOSPHORYLATION CASCADE	17	0.735281	1.9998	0	0.000434306
REACTOME	SYNTHESIS OF PIPS AT THE PLASMA MEMBRANE	53	0.579207	1.9974	0	0.000459332
REACTOME	SIALIC ACID METABOLISM	33	0.634976	1.99539	0	0.000464555
REACTOME	NOTCH4 INTRACELLULAR DOMAIN REGULATES TRANSCRIPTION	20	0.70927	1.99337	0.00149254	0.000483479
REACTOME	JNK C JUN KINASES PHOSPHORYLATION AND ACTIVATION MEDIATED BY ACTIVATED HUMAN TAK1	22	0.698491	1.99318	0.00140056	0.000488654
REACTOME	INTERACTION BETWEEN L1 AND ANKYRINS	31	0.639331	1.99127	0.00137931	0.000503704
REACTOME	AFLATOXIN ACTIVATION AND DETOXIFICATION	19	0.724829	1.991	0	0.000506903
REACTOME	NONSENSE MEDIATED DECAY NMD	115	0.52205	1.99064	0	0.000510049
REACTOME	TRANSLESION SYNTHESIS BY POLK	17	0.743633	1.99023	0	0.000511162
REACTOME	GRB2 EVENTS IN ERBB2 SIGNALING	16	0.757125	1.98543	0	0.000547306
REACTOME	WNT5A DEPENDENT INTERNALIZATION OF FZD4	15	0.750207	1.98369	0	0.000560087
REACTOME	HS GAG DEGRADATION	22	0.689137	1.98212	0.00143062	0.00056503
REACTOME	SUMOYLATION OF DNA DAMAGE RESPONSE AND REPAIR PROTEINS	77	0.544167	1.98173	0	0.000568107
REACTOME	GLUTAMATE BINDING ACTIVATION OF AMPA RECEPTORS AND SYNAPTIC PLASTICITY	31	0.642756	1.97989	0.00130719	0.000576949
REACTOME	PROCESSING OF CAPPED INTRON CONTAINING PRE MRNA	240	0.497943	1.97891	0	0.000581871
REACTOME	TGF BETA RECEPTOR SIGNALING IN EMT EPITHELIAL TO MESENCHYMAL TRANSITION	16	0.744785	1.97884	0	0.000582918
REACTOME	PRE NOTCH PROCESSING IN GOLGI	18	0.715358	1.97663	0	0.000609168
REACTOME	POSITIVE EPIGENETIC REGULATION OF RRNA EXPRESSION	104	0.532643	1.97486	0	0.000629347
REACTOME	DNA METHYLATION	63	0.558465	1.97348	0.00116279	0.00063997
REACTOME	NEPHRIN FAMILY INTERACTIONS	23	0.668378	1.97316	0.00276625	0.000640897
REACTOME	REGULATION OF BETA CELL DEVELOPMENT	42	0.604818	1.97272	0	0.000647572
REACTOME	METABOLISM OF NITRIC OXIDE: ENOS ACTIVATION AND REGULATION	15	0.753629	1.97253	0.00152905	0.000646563
REACTOME	THE ROLE OF NEF IN HIV 1 REPLICATION AND DISEASE PATHOGENESIS	28	0.642708	1.97223	0.00132275	0.000647463
REACTOME	DISEASES ASSOCIATED WITH GLYCOSYLATION PRECURSOR BIOSYNTHESIS	18	0.697949	1.96935	0.0013947	0.000665639
REACTOME	INOSITOL PHOSPHATE METABOLISM	48	0.591101	1.96787	0	0.000679796
REACTOME	GAP JUNCTION ASSEMBLY	37	0.611714	1.9678	0.00126904	0.000678743
REACTOME	DOWNSTREAM SIGNALING OF ACTIVATED FGFR4	27	0.66503	1.96636	0	0.000698677
REACTOME	PINK PARKIN MEDIATED MITOPHAGY	22	0.689702	1.96603	0	0.000701367
REACTOME	PROTEIN METHYLATION	17	0.724955	1.96521	0	0.000704034
REACTOME	GRB2:SOS PROVIDES LINKAGE TO MAPK SIGNALING FOR INTEGRINS	15	0.762026	1.96365	0.00154321	0.000725788
REACTOME	NEGATIVE REGULATION OF FGFR4 SIGNALING	31	0.630658	1.96093	0.00134048	0.000754849
REACTOME	MYOGENESIS	29	0.648499	1.96061	0	0.000755571
REACTOME	GLYCOGEN STORAGE DISEASES	16	0.733196	1.95947	0.0015083	0.000767664
REACTOME	PI 3K CASCADE:FGFR3	18	0.720318	1.95714	0	0.000796784
REACTOME	TICAM1 RIP1 MEDIATED IKK COMPLEX RECRUITMENT	19	0.686716	1.9551	0	0.000810639
REACTOME	PHOSPHORYLATION SITE MUTANTS OF CTNNB1 ARE NOT TARGETED TO THE PROTEASOME BY THE DESTRUCTION COMPLEX	15	0.746146	1.95381	0.00156006	0.000824234
REACTOME	TRANSFERRIN ENDOCYTOSIS AND RECYCLING	31	0.637872	1.94439	0	0.000925912
REACTOME	PROTEIN PROTEIN INTERACTIONS AT SYNAPSES	87	0.529222	1.9434	0	0.000932107
REACTOME	LONG TERM POTENTIATION	23	0.669485	1.943	0	0.000934451
REACTOME	NEGATIVE REGULATION OF MET ACTIVITY	21	0.690524	1.94079	0.00140056	0.000959015
REACTOME	REGULATION OF TP53 ACTIVITY THROUGH METHYLATION	19	0.694115	1.93607	0	0.00102453
REACTOME	TNFS BIND THEIR PHYSIOLOGICAL RECEPTORS	28	0.640617	1.93553	0	0.00103417
REACTOME	GLYCOGEN SYNTHESIS	16	0.737661	1.93472	0	0.00104006
REACTOME	RRNA PROCESSING IN THE NUCLEUS AND CYTOSOL	192	0.490091	1.93243	0	0.00107942
REACTOME	CONVERSION FROM APC C:CDC20 TO APC C:CDH1 IN LATE ANAPHASE	19	0.695605	1.93198	0.00293686	0.00109088
REACTOME	REPRODUCTION	142	0.499084	1.93133	0	0.00109661
REACTOME	DOWNSTREAM SIGNALING OF ACTIVATED FGFR2	30	0.629236	1.93097	0.00130719	0.00110609
REACTOME	TRAF6 MEDIATED INDUCTION OF TAK1 COMPLEX WITHIN TLR4 COMPLEX	16	0.716271	1.92844	0.00152207	0.00115084
REACTOME	RAS ACTIVATION UPON CA2PLUS INFLUX THROUGH NMDA RECEPTOR	20	0.671534	1.92785	0.00441826	0.00116566
REACTOME	TNF RECEPTOR SUPERFAMILY TNFSF MEMBERS MEDIATING NON CANONICAL NF KB PATHWAY	16	0.722145	1.9264	0.00896861	0.00119161
REACTOME	TRANSPORT OF VITAMINS NUCLEOSIDES AND RELATED MOLECULES	44	0.582661	1.92531	0	0.00120091
REACTOME	NEGATIVE REGULATION OF TCF DEPENDENT SIGNALING BY WNT LIGAND ANTAGONISTS	15	0.72496	1.92515	0.00298063	0.00120278
REACTOME	NOTCH3 ACTIVATION AND TRANSMISSION OF SIGNAL TO THE NUCLEUS	25	0.657591	1.9233	0.00137174	0.00124339
REACTOME	RRNA PROCESSING	202	0.486911	1.91927	0	0.00131302
REACTOME	GLUCAGON LIKE PEPTIDE 1 GLP1 REGULATES INSULIN SECRETION	41	0.589368	1.91532	0.00252525	0.00138189
REACTOME	EPHRIN SIGNALING	19	0.688838	1.91503	0.00146628	0.0013817
REACTOME	CHONDROITIN SULFATE BIOSYNTHESIS	20	0.683073	1.91458	0.00276625	0.00139243
REACTOME	FCERI MEDIATED MAPK ACTIVATION	43	0.581914	1.91314	0	0.0014211
REACTOME	ACTIVATED NOTCH1 TRANSMITS SIGNAL TO THE NUCLEUS	31	0.635759	1.91216	0	0.00143728
REACTOME	KERATAN SULFATE KERATIN METABOLISM	34	0.610498	1.91089	0.00127877	0.00145499
REACTOME	PI 3K CASCADE:FGFR1	21	0.675787	1.91084	0.00290276	0.00145468
REACTOME	VASOPRESSIN REGULATES RENAL WATER HOMEOSTASIS VIA AQUAPORINS	42	0.591361	1.90991	0.00375469	0.00145615
REACTOME	DAP12 INTERACTIONS	40	0.590232	1.90862	0.00130039	0.00147371
REACTOME	NEGATIVE REGULATION OF FGFR1 SIGNALING	33	0.601467	1.90644	0.0025413	0.00150781
REACTOME	RNA POLYMERASE I TRANSCRIPTION	109	0.50639	1.90539	0	0.00153091
REACTOME	PRC2 METHYLATES HISTONES AND DNA	71	0.534647	1.90467	0	0.0015377
REACTOME	NONHOMOLOGOUS END JOINING NHEJ	69	0.542583	1.90415	0	0.00154449
REACTOME	MACROAUTOPHAGY	90	0.521381	1.90287	0	0.00156898
REACTOME	NEGATIVE REGULATION OF FGFR2 SIGNALING	34	0.608126	1.901	0.00388098	0.00159891
REACTOME	REGULATION OF TP53 ACTIVITY THROUGH ACETYLATION	30	0.618483	1.89754	0.00268456	0.00166278
REACTOME	GABA B RECEPTOR ACTIVATION	38	0.590795	1.89725	0.00261438	0.00166752
REACTOME	NITRIC OXIDE STIMULATES GUANYLATE CYCLASE	22	0.658997	1.89719	0.0014771	0.00166511
REACTOME	LYSOSOME VESICLE BIOGENESIS	35	0.597525	1.89693	0	0.00166799
REACTOME	REGULATION OF ACTIN DYNAMICS FOR PHAGOCYTIC CUP FORMATION	72	0.529745	1.89614	0.00113766	0.00167808
REACTOME	PI METABOLISM	84	0.52016	1.89522	0	0.00168624
REACTOME	SYNTHESIS OF IP3 AND IP4 IN THE CYTOSOL	26	0.638285	1.89475	0	0.00169259
REACTOME	MECP2 REGULATES NEURONAL RECEPTORS AND CHANNELS	18	0.684271	1.89469	0.00416089	0.00169016
REACTOME	ROS AND RNS PRODUCTION IN PHAGOCYTES	36	0.590969	1.8943	0.00128205	0.00170184
REACTOME	G PROTEIN BETA:GAMMA SIGNALLING	31	0.612195	1.89324	0	0.00172397
REACTOME	CLASS I PEROXISOMAL MEMBRANE PROTEIN IMPORT	20	0.661155	1.89289	0	0.00173202
REACTOME	RUNX1 INTERACTS WITH CO FACTORS WHOSE PRECISE EFFECT ON RUNX1 TARGETS IS NOT KNOWN	37	0.585793	1.89086	0.00253165	0.00178226
REACTOME	GAMMA CARBOXYLATION HYPUSINE FORMATION AND ARYLSULFATASE ACTIVATION	38	0.584027	1.88788	0.00257069	0.0018602
REACTOME	SIGNALING BY NOTCH2	33	0.600708	1.88674	0.0025413	0.00189615
REACTOME	GLYCOSPHINGOLIPID METABOLISM	44	0.56791	1.88548	0	0.00192473
REACTOME	MAP3K8 TPL2 DEPENDENT MAPK1 3 ACTIVATION	16	0.696273	1.885	0.0030303	0.00193765
REACTOME	RNA POLYMERASE I TRANSCRIPTION INITIATION	47	0.556525	1.88447	0.00122249	0.00194544
REACTOME	SIGNAL AMPLIFICATION	31	0.611259	1.88409	0.00376412	0.00195834
REACTOME	NOREPINEPHRINE NEUROTRANSMITTER RELEASE CYCLE	18	0.685297	1.88282	0.00441826	0.00197838
REACTOME	SYNTHESIS OF PA	39	0.585194	1.8801	0	0.00201916
REACTOME	NOTCH HLH TRANSCRIPTION PATHWAY	28	0.627132	1.87727	0.00130208	0.00209093
REACTOME	PI 3K CASCADE:FGFR4	20	0.674107	1.87553	0.00286944	0.00213648
REACTOME	SIGNALING BY BMP	28	0.617756	1.87481	0.00407056	0.00214552
REACTOME	REGULATION OF GENE EXPRESSION IN BETA CELLS	21	0.671273	1.87372	0.00144928	0.00217026
REACTOME	INTERLEUKIN 37 SIGNALING	21	0.646566	1.87186	0.00573066	0.00221911
REACTOME	SUMOYLATION OF TRANSCRIPTION COFACTORS	43	0.569594	1.87085	0	0.00223832
REACTOME	AQUAPORIN MEDIATED TRANSPORT	51	0.552419	1.87062	0.00120919	0.0022369
REACTOME	BASE EXCISION REPAIR AP SITE FORMATION	62	0.538866	1.86854	0.00118203	0.00228036
REACTOME	CLASS A 1 RHODOPSIN LIKE RECEPTORS	321	0.459302	1.86852	0	0.00227718
REACTOME	PURINE CATABOLISM	18	0.681555	1.8637	0.00291545	0.00239905
REACTOME	RAB GERANYLGERANYLATION	64	0.532106	1.86252	0	0.00242476
REACTOME	SURFACTANT METABOLISM	29	0.601462	1.86143	0.00393701	0.00246239
REACTOME	UNBLOCKING OF NMDA RECEPTORS GLUTAMATE BINDING AND ACTIVATION	21	0.646663	1.86141	0.00143472	0.00245898
REACTOME	PKA MEDIATED PHOSPHORYLATION OF CREB	19	0.667669	1.86089	0.00291971	0.00246587
REACTOME	INTRAFLAGELLAR TRANSPORT	54	0.547256	1.85992	0	0.00248778
REACTOME	SHC MEDIATED CASCADE:FGFR3	18	0.65948	1.85721	0.00149031	0.00255706
REACTOME	RMTS METHYLATE HISTONE ARGININES	77	0.508558	1.85234	0	0.00270584
REACTOME	BBSOME MEDIATED CARGO TARGETING TO CILIUM	23	0.640767	1.84973	0.00988701	0.00277674
REACTOME	ER QUALITY CONTROL COMPARTMENT ERQC	21	0.646424	1.84823	0.00416667	0.00280519
REACTOME	MICROAUTOPHAGY	28	0.605182	1.84759	0.00556328	0.00281647
REACTOME	INTERLEUKIN 20 FAMILY SIGNALING	26	0.614082	1.84668	0.00551724	0.00285493
REACTOME	NRIF SIGNALS CELL DEATH FROM THE NUCLEUS	16	0.697294	1.84627	0.00611621	0.00286285
REACTOME	GLYCOGEN BREAKDOWN GLYCOGENOLYSIS	15	0.694168	1.84502	0.0058651	0.00290799
REACTOME	ORGANIC CATION ANION ZWITTERION TRANSPORT	15	0.710624	1.84472	0.0137825	0.00290907
REACTOME	O GLYCOSYLATION OF TSR DOMAIN CONTAINING PROTEINS	39	0.578511	1.84349	0	0.00294534
REACTOME	RNA POLYMERASE I PROMOTER ESCAPE	89	0.502325	1.83903	0	0.0030637
REACTOME	ERCC6 CSB AND EHMT2 G9A POSITIVELY REGULATE RRNA EXPRESSION	74	0.511218	1.83713	0.00114416	0.00312305
REACTOME	TRISTETRAPROLIN TTP ZFP36 BINDS AND DESTABILIZES MRNA	17	0.671033	1.83712	0.00145773	0.00311881
REACTOME	INTERACTIONS OF REV WITH HOST CELLULAR PROTEINS	37	0.571406	1.83431	0.00258065	0.00320299
REACTOME	EXPORT OF VIRAL RIBONUCLEOPROTEINS FROM NUCLEUS	33	0.582487	1.83314	0.00271739	0.0032471
REACTOME	RAB GEFS EXCHANGE GTP FOR GDP ON RABS	89	0.497704	1.83216	0.00109051	0.00327267
REACTOME	INLB MEDIATED ENTRY OF LISTERIA MONOCYTOGENES INTO HOST CELL	15	0.691051	1.83155	0.00446429	0.00328321
REACTOME	NEUREXINS AND NEUROLIGINS	56	0.530643	1.82987	0.00116414	0.00334719
REACTOME	INITIAL TRIGGERING OF COMPLEMENT	33	0.594222	1.82956	0.00388601	0.00335434
REACTOME	DEPURINATION	55	0.539914	1.82929	0.00240096	0.00335987
REACTOME	RAP1 SIGNALLING	16	0.695675	1.82902	0.0102639	0.00336524
REACTOME	ABC TRANSPORTERS IN LIPID HOMEOSTASIS	18	0.657237	1.82633	0.00296736	0.0034581
REACTOME	DEFECTS IN VITAMIN AND COFACTOR METABOLISM	20	0.658177	1.82496	0.0056338	0.00350631
REACTOME	ADP SIGNALLING THROUGH P2Y PURINOCEPTOR 1	24	0.615392	1.82036	0.00282486	0.00366777
REACTOME	RNA POLYMERASE III TRANSCRIPTION TERMINATION	23	0.628832	1.81938	0	0.00370057
REACTOME	SUMOYLATION OF TRANSCRIPTION FACTORS	20	0.657227	1.81911	0.00747384	0.00370055
REACTOME	SUMOYLATION OF UBIQUITINYLATION PROTEINS	39	0.552556	1.81891	0.00250313	0.00370391
REACTOME	NOTCH2 ACTIVATION AND TRANSMISSION OF SIGNAL TO THE NUCLEUS	22	0.626061	1.81745	0.00282885	0.00375627
REACTOME	REGULATION OF FZD BY UBIQUITINATION	21	0.638547	1.8161	0.012605	0.00379549
REACTOME	NEGATIVE REGULATION OF NMDA RECEPTOR MEDIATED NEURONAL TRANSMISSION	21	0.642097	1.81255	0.00426136	0.00395069
REACTOME	NEGATIVE EPIGENETIC REGULATION OF RRNA EXPRESSION	107	0.486726	1.80993	0	0.00403029
REACTOME	RAB REGULATION OF TRAFFICKING	121	0.473771	1.80925	0	0.00405758
REACTOME	SYNAPTIC ADHESION LIKE MOLECULES	21	0.626463	1.80831	0.00858369	0.0040895
REACTOME	FRS MEDIATED FGFR3 SIGNALING	20	0.640786	1.80728	0.00564175	0.00411506
REACTOME	RNA POLYMERASE II TRANSCRIPTION TERMINATION	66	0.512186	1.80518	0.00116279	0.00421534
REACTOME	KERATAN SULFATE BIOSYNTHESIS	28	0.597763	1.79955	0.00542005	0.00445251
REACTOME	CLASS B 2 SECRETIN FAMILY RECEPTORS	93	0.487498	1.79607	0	0.00462162
REACTOME	GLUCAGON SIGNALING IN METABOLIC REGULATION	32	0.572619	1.79303	0.0104575	0.00476268
REACTOME	METALLOPROTEASE DUBS	37	0.554377	1.79032	0.0078637	0.00490621
REACTOME	HOST INTERACTIONS WITH INFLUENZA FACTORS	43	0.544108	1.78427	0.00752823	0.00523174
REACTOME	SIRT1 NEGATIVELY REGULATES RRNA EXPRESSION	66	0.502358	1.78342	0	0.0052715
REACTOME	CYTOSOLIC SULFONATION OF SMALL MOLECULES	24	0.610091	1.78304	0.00410397	0.00527585
REACTOME	ACTIVATION OF SMO	18	0.652647	1.77641	0.00753012	0.0056341
REACTOME	SIGNALING BY NOTCH1 HD DOMAIN MUTANTS IN CANCER	15	0.669042	1.77248	0.00458716	0.0058223
REACTOME	BUTYRATE RESPONSE FACTOR 1 BRF1 BINDS AND DESTABILIZES MRNA	17	0.664801	1.77126	0.00747384	0.00589012
REACTOME	NEF MEDIATES DOWN MODULATION OF CELL SURFACE RECEPTORS BY RECRUITING THEM TO CLATHRIN ADAPTERS	21	0.629346	1.76902	0.0097629	0.00603306
REACTOME	HDACS DEACETYLATE HISTONES	92	0.485645	1.76682	0	0.00616237
REACTOME	ACTIVATION OF KAINATE RECEPTORS UPON GLUTAMATE BINDING	29	0.56865	1.76567	0.0145503	0.00622947
REACTOME	ACYL CHAIN REMODELLING OF PE	24	0.603489	1.76518	0.00827586	0.00625986
REACTOME	PI 3K CASCADE:FGFR2	23	0.630571	1.75883	0.00704225	0.00669616
REACTOME	TRANSCRIPTIONAL REGULATION BY SMALL RNAS	105	0.470972	1.75872	0.00220994	0.00669549
REACTOME	FGFR2 ALTERNATIVE SPLICING	27	0.569798	1.75768	0.0124309	0.00676503
REACTOME	PROCESSING OF CAPPED INTRONLESS PRE MRNA	28	0.575713	1.75736	0.00929615	0.00677541
REACTOME	ELEVATION OF CYTOSOLIC CA2PLUS LEVELS	16	0.660614	1.75512	0.0133531	0.00691559
REACTOME	NAPLUS CL DEPENDENT NEUROTRANSMITTER TRANSPORTERS	19	0.625097	1.75355	0.00433526	0.0070286
REACTOME	ZINC TRANSPORTERS	17	0.636494	1.74936	0.0114123	0.00731041
REACTOME	DEADENYLATION DEPENDENT MRNA DECAY	55	0.511797	1.74479	0.00485437	0.00761888
REACTOME	G BETA:GAMMA SIGNALLING THROUGH PI3KGAMMA	24	0.592293	1.74299	0.0219479	0.00775865
REACTOME	IMMUNOREGULATORY INTERACTIONS BETWEEN A LYMPHOID AND A NON LYMPHOID CELL	136	0.454448	1.74244	0	0.00778807
REACTOME	SIGNALING BY FGFR2 IN DISEASE	43	0.529499	1.74223	0.0062422	0.00780018
REACTOME	CARBOXYTERMINAL POST TRANSLATIONAL MODIFICATIONS OF TUBULIN	41	0.534654	1.74169	0.00633714	0.00782016
REACTOME	PROLACTIN RECEPTOR SIGNALING	15	0.65253	1.74067	0.0109546	0.00787276
REACTOME	CELLULAR HEXOSE TRANSPORT	21	0.609528	1.73266	0.00584795	0.00852964
REACTOME	TIGHT JUNCTION INTERACTIONS	30	0.564997	1.73213	0.00935829	0.00855313
REACTOME	COMPLEX I BIOGENESIS	50	0.518953	1.73012	0.00842359	0.0087095
REACTOME	DNA DAMAGE RECOGNITION IN GG NER	38	0.537144	1.72946	0.00871731	0.00875484
REACTOME	TRAFFICKING OF GLUR2 CONTAINING AMPA RECEPTORS	17	0.64979	1.72937	0.016692	0.00875316
REACTOME	ACTIVATED PKN1 STIMULATES TRANSCRIPTION OF AR ANDROGEN RECEPTOR REGULATED GENES KLK2 AND KLK3	65	0.48742	1.72479	0.00472813	0.00910303
REACTOME	INTERACTIONS OF VPR WITH HOST CELLULAR PROTEINS	37	0.544136	1.72225	0.0142303	0.00930884
REACTOME	DOPAMINE NEUROTRANSMITTER RELEASE CYCLE	23	0.592388	1.72142	0.0168539	0.00936386
REACTOME	SIGNALING BY FGFR2 IIIA TM	19	0.603709	1.72068	0.0174927	0.00942794
REACTOME	KSRP KHSRP BINDS AND DESTABILIZES MRNA	17	0.642543	1.71934	0.00727802	0.00953995
REACTOME	THE CANONICAL RETINOID CYCLE IN RODS TWILIGHT VISION	23	0.593248	1.71462	0.0137741	0.00997287
REACTOME	HIV LIFE CYCLE	151	0.447344	1.71026	0	0.0103761
REACTOME	FRS MEDIATED FGFR4 SIGNALING	22	0.596041	1.70677	0.0195531	0.0106849
REACTOME	MTORC1 MEDIATED SIGNALLING	22	0.58337	1.70368	0.0184397	0.0110073
REACTOME	DISEASES ASSOCIATED WITH O GLYCOSYLATION OF PROTEINS	67	0.48697	1.7022	0.00815851	0.0111365
REACTOME	TRANSPORT OF MATURE TRANSCRIPT TO CYTOPLASM	83	0.46659	1.69937	0.00566251	0.0114
REACTOME	CARGO TRAFFICKING TO THE PERICILIARY MEMBRANE	51	0.497056	1.69831	0.00835322	0.0114906
REACTOME	REGULATION OF GENE EXPRESSION IN LATE STAGE BRANCHING MORPHOGENESIS PANCREATIC BUD PRECURSOR CELLS	16	0.627261	1.69589	0.0198864	0.0117462
REACTOME	SHC MEDIATED CASCADE:FGFR4	20	0.612523	1.69525	0.00835655	0.0117972
REACTOME	O LINKED GLYCOSYLATION	110	0.448552	1.69253	0	0.0120254
REACTOME	INSULIN PROCESSING	27	0.563295	1.69096	0.0158103	0.0122071
REACTOME	PKA ACTIVATION IN GLUCAGON SIGNALLING	17	0.636039	1.68971	0.0194611	0.012306
REACTOME	GPCR LIGAND BINDING	451	0.416716	1.68715	0	0.0125723
REACTOME	SIGNAL REGULATORY PROTEIN FAMILY INTERACTIONS	16	0.636275	1.68678	0.0196672	0.0125948
REACTOME	THROMBOXANE SIGNALLING THROUGH TP RECEPTOR	22	0.579357	1.68509	0.0172911	0.0127448
REACTOME	NUCLEAR IMPORT OF REV PROTEIN	34	0.548054	1.68489	0.0157895	0.0127565
REACTOME	G PROTEIN ACTIVATION	27	0.548702	1.68009	0.0188172	0.0132969
REACTOME	ADRENALINE NORADRENALINE INHIBITS INSULIN SECRETION	27	0.555818	1.67613	0.0146862	0.0137281
REACTOME	DEADENYLATION OF MRNA	24	0.559413	1.66828	0.0281294	0.0146873
REACTOME	TRANSPORT OF MATURE MRNAS DERIVED FROM INTRONLESS TRANSCRIPTS	43	0.505672	1.66313	0.019802	0.0153327
REACTOME	CGMP EFFECTS	16	0.617267	1.66278	0.019403	0.0153605
REACTOME	SUMOYLATION OF RNA BINDING PROTEINS	47	0.493458	1.66092	0.0107527	0.0155868
REACTOME	TRANSPORT OF THE SLBP DEPENDANT MATURE MRNA	36	0.522968	1.65812	0.0166667	0.015944
REACTOME	HATS ACETYLATE HISTONES	139	0.435406	1.64875	0.00106383	0.0171528
REACTOME	SUMOYLATION OF CHROMATIN ORGANIZATION PROTEINS	71	0.460734	1.64789	0.00691244	0.017243
REACTOME	DEFECTIVE TPR MAY CONFER SUSCEPTIBILITY TOWARDS THYROID PAPILLARY CARCINOMA TPC	32	0.526898	1.64665	0.0169713	0.0173663
REACTOME	GENE SILENCING BY RNA	135	0.427154	1.6464	0.00319829	0.0173706
REACTOME	FANCONI ANEMIA PATHWAY	39	0.504029	1.64422	0.0204604	0.0176724
REACTOME	STIMULI SENSING CHANNELS	106	0.442526	1.64327	0	0.0178048
REACTOME	SEROTONIN NEUROTRANSMITTER RELEASE CYCLE	18	0.586522	1.64206	0.0357143	0.0179608
REACTOME	ANTIGEN ACTIVATES B CELL RECEPTOR BCR LEADING TO GENERATION OF SECOND MESSENGERS	42	0.490746	1.63599	0.0186335	0.0188164
REACTOME	SYNTHESIS SECRETION AND DEACYLATION OF GHRELIN	19	0.590827	1.63335	0.026087	0.0192205
REACTOME	SYNTHESIS OF LEUKOTRIENES LT AND EOXINS EX	21	0.583281	1.63293	0.0241477	0.0192638
REACTOME	PHOSPHOLIPASE C MEDIATED CASCADE FGFR4	15	0.626834	1.63192	0.0252976	0.0193799
REACTOME	SHC MEDIATED CASCADE:FGFR1	21	0.573716	1.62858	0.0314286	0.0199212
REACTOME	MITOCHONDRIAL TRANSLATION	94	0.439817	1.62733	0.00652174	0.0200929
REACTOME	FRS MEDIATED FGFR1 SIGNALING	23	0.558814	1.62668	0.0314208	0.0201737
REACTOME	ROLE OF PHOSPHOLIPIDS IN PHAGOCYTOSIS	36	0.509259	1.61474	0.0191571	0.0222061
REACTOME	GABA RECEPTOR ACTIVATION	55	0.462578	1.60731	0.0188457	0.0235424
REACTOME	TBC RABGAPS	43	0.486222	1.60721	0.0289308	0.0235291
REACTOME	SHC MEDIATED CASCADE:FGFR2	23	0.56199	1.60567	0.0300958	0.0237674
REACTOME	PKMTS METHYLATE HISTONE LYSINES	69	0.457692	1.60455	0.011655	0.0239463
REACTOME	ACYL CHAIN REMODELLING OF PS	21	0.57491	1.60266	0.0367232	0.0242608
REACTOME	FRS MEDIATED FGFR2 SIGNALING	25	0.547697	1.60121	0.0305981	0.0245143
REACTOME	N GLYCAN ANTENNAE ELONGATION IN THE MEDIAL TRANS GOLGI	26	0.545405	1.59631	0.0315934	0.0254492
REACTOME	RECEPTOR TYPE TYROSINE PROTEIN PHOSPHATASES	20	0.550055	1.59612	0.035503	0.025454
REACTOME	PHOSPHOLIPASE C MEDIATED CASCADE FGFR2	18	0.566501	1.59089	0.0557185	0.0264513
REACTOME	FGFR1 LIGAND BINDING AND ACTIVATION	16	0.592628	1.58026	0.0394737	0.0286947
REACTOME	ADP SIGNALLING THROUGH P2Y PURINOCEPTOR 12	21	0.541219	1.57966	0.038835	0.0287801
REACTOME	RNA POLYMERASE I TRANSCRIPTION TERMINATION	31	0.511134	1.57477	0.0432503	0.0298239
REACTOME	ENERGY DEPENDENT REGULATION OF MTOR BY LKB1 AMPK	28	0.514667	1.57442	0.0456376	0.0298762
REACTOME	MISCELLANEOUS TRANSPORT AND BINDING EVENTS	26	0.530128	1.57122	0.0346205	0.0305944
REACTOME	RNA POLYMERASE III TRANSCRIPTION	41	0.475797	1.57094	0.0353535	0.0306222
REACTOME	ASSEMBLY OF THE HIV VIRION	16	0.587239	1.55538	0.0589102	0.0343346
REACTOME	MRNA CAPPING	29	0.504761	1.55517	0.0430108	0.0343551
REACTOME	N GLYCAN ANTENNAE ELONGATION	15	0.582788	1.55397	0.0415385	0.034649
REACTOME	NUCLEOTIDE LIKE PURINERGIC RECEPTORS	16	0.578853	1.55352	0.0541353	0.0347166
REACTOME	G BETA:GAMMA SIGNALLING THROUGH CDC42	19	0.575365	1.5515	0.0488166	0.0351978
REACTOME	METABOLISM OF NON CODING RNA	54	0.45223	1.5506	0.02442	0.035406
REACTOME	PROCESSING OF INTRONLESS PRE MRNAS	19	0.554459	1.54867	0.0549928	0.0358591
REACTOME	G PROTEIN GATED POTASSIUM CHANNELS	24	0.530853	1.54072	0.0612813	0.0378864
REACTOME	SUMOYLATION OF DNA METHYLATION PROTEINS	16	0.577824	1.53975	0.05613	0.0380807
REACTOME	PRESYNAPTIC FUNCTION OF KAINATE RECEPTORS	20	0.550594	1.53252	0.0610795	0.0400965
REACTOME	TRNA PROCESSING IN THE NUCLEUS	58	0.441106	1.53076	0.035503	0.040524
REACTOME	INWARDLY RECTIFYING KPLUS CHANNELS	30	0.498194	1.52181	0.0513834	0.043004
REACTOME	ACYL CHAIN REMODELLING OF PC	26	0.502492	1.50936	0.0617111	0.0467228
REACTOME	INSULIN RECEPTOR RECYCLING	26	0.503746	1.50918	0.0545213	0.0467201
REACTOME	REGULATION OF INNATE IMMUNE RESPONSES TO CYTOSOLIC DNA	15	0.572888	1.50682	0.0686567	0.0474145
REACTOME	MITOCHONDRIAL CALCIUM ION TRANSPORT	23	0.515285	1.50407	0.0752841	0.0482284
REACTOME	PROSTACYCLIN SIGNALLING THROUGH PROSTACYCLIN RECEPTOR	18	0.542506	1.4986	0.0644699	0.0499486
REACTOME	FORMATION OF TC NER PRE INCISION COMPLEX	53	0.44109	1.49218	0.0415184	0.0519485
REACTOME	GLUCURONIDATION	25	0.498925	1.4715	0.0818554	0.0593894
REACTOME	MRNA SPLICING MINOR PATHWAY	52	0.435406	1.47128	0.0683453	0.0594132
REACTOME	FGFR2 LIGAND BINDING AND ACTIVATION	20	0.535413	1.46779	0.0777126	0.0607326
REACTOME	SUMOYLATION OF SUMOYLATION PROTEINS	35	0.459888	1.46082	0.0633245	0.0633608
REACTOME	ACYL CHAIN REMODELLING OF PG	18	0.520683	1.4556	0.0928144	0.0653686
REACTOME	CREATION OF C4 AND C2 ACTIVATORS	25	0.489737	1.45246	0.0841121	0.066596
REACTOME	WNT LIGAND BIOGENESIS AND TRAFFICKING	26	0.482697	1.44053	0.0857143	0.0716556
REACTOME	SIGNALING BY NODAL	20	0.518105	1.43875	0.0876437	0.0724059
REACTOME	FCERI MEDIATED CAPLUS2 MOBILIZATION	42	0.446747	1.43555	0.0701754	0.0737219
REACTOME	G ALPHA S SIGNALLING EVENTS	154	0.367408	1.42339	0.0271116	0.0792066
REACTOME	RRNA MODIFICATION IN THE NUCLEUS AND CYTOSOL	60	0.410051	1.40688	0.0637786	0.0871651
REACTOME	TRNA PROCESSING	108	0.371498	1.401	0.055914	0.0900495
REACTOME	METABOLISM OF AMINE DERIVED HORMONES	18	0.496249	1.38386	0.12301	0.0990827
REACTOME	VIRAL MESSENGER RNA SYNTHESIS	44	0.430026	1.38165	0.0976514	0.100197
REACTOME	MITOCHONDRIAL TRNA AMINOACYLATION	21	0.481535	1.38064	0.140845	0.100678
REACTOME	ACETYLCHOLINE NEUROTRANSMITTER RELEASE CYCLE	17	0.500831	1.35893	0.150507	0.113408
REACTOME	BUDDING AND MATURATION OF HIV VIRION	28	0.448511	1.3584	0.129199	0.113623
REACTOME	PIWI INTERACTING RNA PIRNA BIOGENESIS	28	0.448118	1.35763	0.133423	0.113996
REACTOME	GENERATION OF SECOND MESSENGER MOLECULES	32	0.425883	1.35211	0.12069	0.117356
REACTOME	MRNA DECAY BY 3 TO 5 EXORIBONUCLEASE	16	0.500007	1.35126	0.152108	0.117773
REACTOME	REGULATION OF IFNA SIGNALING	25	0.446979	1.35108	0.132682	0.117743
REACTOME	CRISTAE FORMATION	26	0.450429	1.3494	0.139946	0.118646
REACTOME	MICRORNA MIRNA BIOGENESIS	25	0.449247	1.33872	0.140751	0.125407
REACTOME	RETROGRADE TRANSPORT AT THE TRANS GOLGI NETWORK	49	0.398542	1.33444	0.119565	0.128211
REACTOME	STING MEDIATED INDUCTION OF HOST IMMUNE RESPONSES	16	0.494232	1.31761	0.174743	0.139687
REACTOME	INCRETIN SYNTHESIS SECRETION AND INACTIVATION	23	0.458572	1.31201	0.169916	0.143732
REACTOME	POST TRANSLATIONAL MODIFICATION: SYNTHESIS OF GPI ANCHORED PROTEINS	94	0.356257	1.30949	0.113311	0.145397
REACTOME	INTRA GOLGI TRAFFIC	44	0.395559	1.29799	0.166667	0.153944
REACTOME	SYNTHESIS OF PIPS AT THE EARLY ENDOSOME MEMBRANE	16	0.488672	1.29785	0.201717	0.153867
REACTOME	PHASE 0 RAPID DEPOLARISATION	44	0.390806	1.28744	0.149936	0.16176
REACTOME	FGFR2 MUTANT RECEPTOR ACTIVATION	33	0.409688	1.27981	0.197644	0.167742
REACTOME	O LINKED GLYCOSYLATION OF MUCINS	61	0.372107	1.27831	0.152446	0.168801
REACTOME	FORMATION OF THE CORNIFIED ENVELOPE	125	0.33131	1.26848	0.132556	0.17682
REACTOME	ACYL CHAIN REMODELLING OF PI	16	0.48362	1.25851	0.196594	0.18522
REACTOME	RNA POLYMERASE III CHAIN ELONGATION	18	0.455424	1.25627	0.213139	0.186993
REACTOME	MRNA DECAY BY 5 TO 3 EXORIBONUCLEASE	15	0.445331	1.21396	0.239583	0.226623
REACTOME	SCAVENGING OF HEME FROM PLASMA	24	0.411408	1.20105	0.26556	0.239622
REACTOME	PROCESSING OF SMDT1	16	0.44422	1.19344	0.267267	0.247395
REACTOME	ENDOSOMAL SORTING COMPLEX REQUIRED FOR TRANSPORT ESCRT	31	0.385984	1.19182	0.261808	0.248895
REACTOME	RNA POLYMERASE III TRANSCRIPTION INITIATION FROM TYPE 3 PROMOTER	28	0.392777	1.18635	0.262667	0.254454
REACTOME	HDMS DEMETHYLATE HISTONES	48	0.356249	1.18046	0.272503	0.260542
REACTOME	GLUCAGON TYPE LIGAND RECEPTORS	32	0.37382	1.16026	0.296774	0.282988
REACTOME	VXPX CARGO TARGETING TO CILIUM	21	0.402976	1.13727	0.319088	0.30984
REACTOME	DIGESTION AND ABSORPTION	28	0.372714	1.12071	0.336927	0.329415
REACTOME	DISEASES ASSOCIATED WITH N GLYCOSYLATION OF PROTEINS	17	0.420932	1.11187	0.349112	0.339931
REACTOME	RNA POLYMERASE II TRANSCRIPTION PRE INITIATION AND PROMOTER OPENING	47	0.333017	1.1096	0.328467	0.342362
REACTOME	RNA POLYMERASE III TRANSCRIPTION INITIATION FROM TYPE 1 PROMOTER	28	0.356401	1.09428	0.362398	0.361606
REACTOME	TRNA MODIFICATION IN THE NUCLEUS AND CYTOSOL	43	0.337503	1.08474	0.372861	0.373517
REACTOME	ROLE OF LAT2 NTAL LAB ON CALCIUM MOBILIZATION	27	0.344291	1.04119	0.381579	0.431676
REACTOME	FORMATION OF ATP BY CHEMIOSMOTIC COUPLING	15	0.398756	1.02523	0.443939	0.453338
REACTOME	TRAF6 MEDIATED IRF7 ACTIVATION	28	0.341006	1.02402	0.43832	0.454524
REACTOME	ANTIMICROBIAL PEPTIDES	80	0.280518	1.01983	0.448703	0.459957
REACTOME	FORMATION OF THE EARLY ELONGATION COMPLEX	33	0.319985	1.00801	0.455369	0.476037
REACTOME	RNA POLYMERASE II TRANSCRIPTION ELONGATION	60	0.280749	0.998351	0.465621	0.489054
REACTOME	DECTIN 2 FAMILY	25	0.339606	0.994093	0.468579	0.494627
REACTOME	RNA POLYMERASE II TRANSCRIBES SNRNA GENES	79	0.27145	0.985743	0.506215	0.50576
REACTOME	TRP CHANNELS	28	0.318013	0.970114	0.500678	0.527382
REACTOME	SYNTHESIS OF GLYCOSYLPHOSPHATIDYLINOSITOL GPI	18	0.350871	0.966792	0.48503	0.531449
REACTOME	PD 1 SIGNALING	22	0.331123	0.956003	0.534626	0.546585
REACTOME	TERMINATION OF O GLYCAN BIOSYNTHESIS	22	0.333165	0.947772	0.522346	0.557557
REACTOME	PHASE 2 PLATEAU PHASE	27	0.315902	0.944161	0.546575	0.561987
REACTOME	RNA POLYMERASE II PRE TRANSCRIPTION EVENTS	83	0.253992	0.934989	0.574136	0.574314
REACTOME	PHOSPHORYLATION OF CD3 AND TCR ZETA CHAINS	21	0.328956	0.927277	0.539589	0.584426
REACTOME	POTASSIUM CHANNELS	97	0.241604	0.90153	0.62931	0.619939
REACTOME	THE PHOTOTRANSDUCTION CASCADE	33	0.268728	0.835066	0.655527	0.709608
REACTOME	ABORTIVE ELONGATION OF HIV 1 TRANSCRIPT IN THE ABSENCE OF TAT	23	0.281634	0.831528	0.675378	0.713394
REACTOME	EICOSANOID LIGAND BINDING RECEPTORS	15	0.31541	0.828362	0.687316	0.716841
REACTOME	FATTY ACIDS	15	0.309502	0.814242	0.682589	0.734381
REACTOME	TRANSCRIPTION OF THE HIV GENOME	72	0.226295	0.813397	0.723256	0.734627
REACTOME	DIGESTION	23	0.273823	0.80602	0.698779	0.743294
REACTOME	PHASE 4 RESTING MEMBRANE POTENTIAL	18	0.285739	0.785755	0.706629	0.768073
REACTOME	COBALAMIN CBL VITAMIN B12 TRANSPORT AND METABOLISM	19	0.283203	0.77301	0.738397	0.782773
REACTOME	FORMATION OF HIV ELONGATION COMPLEX IN THE ABSENCE OF HIV TAT	47	0.228495	0.762022	0.780723	0.795157
REACTOME	SYNTHESIS OF PIPS AT THE GOLGI MEMBRANE	18	0.270721	0.758738	0.755988	0.798187
REACTOME	VOLTAGE GATED POTASSIUM CHANNELS	43	0.223596	0.730362	0.796856	0.829632
REACTOME	TRANSLOCATION OF ZAP 70 TO IMMUNOLOGICAL SYNAPSE	18	0.237235	0.655598	0.863704	0.903498
REACTOME	BLOOD GROUP SYSTEMS BIOSYNTHESIS	21	0.227644	0.637138	0.88674	0.918358
REACTOME	AMINE LIGAND BINDING RECEPTORS	42	0.182101	0.595018	0.94335	0.94785
REACTOME	HIV ELONGATION ARREST AND RECOVERY	35	0.122675	0.38731	1	0.999119
